# Supplementary material for: Nucleophilic Functionalization of 2-R-3-Nitropyridines as a Versatile Approach to Novel Fluorescent Molecules
Source: MDPI journal article supplement (doi:10.3390/molecules27175692), 2022-09-03

# Supplementary materials.

## **Nucleophilic functionalization of 2-R-3-nitropyridines as a versatile approach to novel fluorescent molecules**

Vladislav V. Nikol'skiy,<sup>a</sup> Mikhail E. Minyaev,<sup>a</sup> Maxim A. Bastrakov<sup>a</sup> and Alexey M. Starosotnikov\*<sup>a</sup>

N.D. Zelinsky Institute of Organic Chemistry RAS, Leninsky prosp. 47, 11991 Moscow, Russia  
E-mail: alexey41@list.ru

---

## X-ray crystallographic data and refinement details.

X-ray diffraction data for **5h** were collected at 100K on a Bruker Quest D8 diffractometer equipped with a Photon-III area-detector, using graphite-monochromatized Mo K $\alpha$ -radiation and shutterless  $\phi$ - and  $\omega$ -scan technique. The intensity data were integrated by the SAINT program<sup>S3</sup> and were semi-empirically corrected for absorption and decay using SADABS.<sup>S4</sup> X-ray diffraction data for **4a**, **4i** and **5l** were collected at 100K on a four-circle Rigaku Synergy S diffractometer equipped with a HyPix6000HE area-detector, using monochromatized Cu K $\alpha$ -radiation and shutterless  $\omega$ -scan technique. The intensity data were integrated and corrected for absorption and decay by the CrysAlisPro program.<sup>S5</sup> All structures were solved by direct methods using SHELXT<sup>S6</sup> and refined by the full-matrix least-squares method on  $F^2$  using SHELXL-2018.<sup>S7</sup> Positions of all atoms were found from the electron density-difference map. Atoms were refined with individual anisotropic (non-hydrogen atoms) or isotropic (hydrogen atoms) displacement parameters. The *Mercury* program<sup>S8</sup> was used for molecular graphics.

Crystal data, data collection and structure refinement details are summarized in Table S1. The structures have been deposited at the Cambridge Crystallographic Data Center with the reference CCDC numbers 2191010-2191013; they also contain the supplementary crystallographic data. These data can be obtained free of charge from the CCDC via [http://www.ccdc.cam.ac.uk/data\\_request/cif](http://www.ccdc.cam.ac.uk/data_request/cif)

**Table S1.** Crystal data, data collection and structure refinement details for **4a**, **4i**, **5h** and **5l**.

| Identification code                 | <b>4a</b>                                                      | <b>4i</b>                                                                     | <b>5h</b>                                                         | <b>5l</b>                                                       |
|-------------------------------------|----------------------------------------------------------------|-------------------------------------------------------------------------------|-------------------------------------------------------------------|-----------------------------------------------------------------|
| Empirical formula                   | C <sub>13</sub> H <sub>8</sub> ClN <sub>3</sub> O <sub>4</sub> | C <sub>14</sub> H <sub>8</sub> ClF <sub>3</sub> N <sub>2</sub> O <sub>2</sub> | C <sub>17</sub> H <sub>17</sub> ClN <sub>2</sub> O <sub>2</sub> S | C <sub>19</sub> H <sub>23</sub> N <sub>3</sub> O <sub>2</sub> S |
| Formula weight                      | 305.67                                                         | 328.67                                                                        | 348.83                                                            | 357.46                                                          |
| Temperature (K)                     | 100.0(1)                                                       | 100.0(1)                                                                      | 100(2)                                                            | 100.0(1)                                                        |
| Wavelength (Å)                      | 1.54184                                                        | 1.54184                                                                       | 0.71073                                                           | 1.54184                                                         |
| Crystal system                      | Triclinic                                                      | Triclinic                                                                     | Monoclinic                                                        | Monoclinic                                                      |
| Space group                         | P $\bar{1}$                                                    | P $\bar{1}$                                                                   | P2 <sub>1</sub> /c                                                | P2 <sub>1</sub> /c                                              |
| Unit cell dimensions                |                                                                |                                                                               |                                                                   |                                                                 |
| a (Å)                               | 7.44202(12)                                                    | 4.86262(11)                                                                   | 9.5251(2)                                                         | 9.77416(6)                                                      |
| b (Å)                               | 12.07532(18)                                                   | 10.0223(2)                                                                    | 17.2271(3)                                                        | 17.15004(10)                                                    |
| c (Å)                               | 14.4433(3)                                                     | 13.5534(3)                                                                    | 10.0200(2)                                                        | 10.58888(5)                                                     |
| $\alpha$ (°)                        | 88.6177(14)                                                    | 80.0002(18)                                                                   | 90                                                                | 90                                                              |
| $\beta$ (°)                         | 77.0110(15)                                                    | 89.1992(18)                                                                   | 92.1044(6)                                                        | 96.7058(5)                                                      |
| $\gamma$ (°)                        | 83.0977(13)                                                    | 89.4931(19)                                                                   | 90                                                                | 90                                                              |
| Volume (Å <sup>3</sup> )            | 1255.56(4)                                                     | 650.41(2)                                                                     | 1643.07(6)                                                        | 1762.842(17)                                                    |
| Z                                   | 4                                                              | 2                                                                             | 4                                                                 | 4                                                               |
| Calcd Density (g•cm <sup>-3</sup> ) | 1.617                                                          | 1.678                                                                         | 1.410                                                             | 1.347                                                           |

|                                                                   |                                  |                                  |                                    |                                    |
|-------------------------------------------------------------------|----------------------------------|----------------------------------|------------------------------------|------------------------------------|
| $\mu$ (mm <sup>-1</sup> )                                         | 2.915                            | 3.060                            | 0.370                              | 1.774                              |
| F(000)                                                            | 624                              | 332                              | 728                                | 760                                |
| Crystal size (mm)                                                 | 0.19×0.07×0.05                   | 0.20×0.09×0.04                   | 0.32×0.16×0.06                     | 0.31×0.19×0.10                     |
| $\theta$ range (°)                                                | 3.140-79.821                     | 3.311-79.741                     | 2.140-33.150                       | 4.555-79.463                       |
| Index ranges                                                      | -8≤h≤9,<br>-15≤k≤15,<br>-18≤l≤18 | -6≤h≤4,<br>-12≤k≤12,<br>-17≤l≤17 | -14≤h≤14,<br>-26≤k≤26,<br>-15≤l≤14 | -12≤h≤12,<br>-21≤k≤21,<br>-13≤l≤12 |
| Reflections                                                       |                                  |                                  |                                    |                                    |
| Collected                                                         | 31671                            | 16837                            | 47789                              | 45369                              |
| Independent [ $R_{\text{int}}$ ]                                  | 5409 [0.0314]                    | 2786 [0.0284]                    | 6266 [0.0353]                      | 3828 [0.0263]                      |
| Observed ( $I > 2\sigma(I)$ )                                     | 5313                             | 2756                             | 5407                               | 3818                               |
| Completeness to $\theta_{\text{full}}$                            | 0.999                            | 1.000                            | 0.998                              | 1.000                              |
| $T_{\text{max}} / T_{\text{min}}$                                 | 1.0000 / 0.7049                  | 1.0000 / 0.4436                  | 0.6957 / 0.6432                    | 1.0000 / 0.7325                    |
| Data/restraints/parameters                                        | 5409 / 0 / 443                   | 2786 / 0 / 231                   | 6266 / 0 / 276                     | 3828 / 0 / 319                     |
| Goodness-of-fit on $F^2$                                          | 1.079                            | 1.075                            | 1.038                              | 1.035                              |
| $R1/wR2$ indices ( $I > 2\sigma(I)$ )                             | 0.0351 / 0.1012                  | 0.0403 / 0.1148                  | 0.0304 / 0.0781                    | 0.0302 / 0.0843                    |
| $R1/wR2$ indices (all data)                                       | 0.0355 / 0.1015                  | 0.0405 / 0.1150                  | 0.0388 / 0.0849                    | 0.0302 / 0.0843                    |
| $\Delta\rho(\bar{e})$ max / min ( $\bar{e}\cdot\text{\AA}^{-3}$ ) | 0.282 / -0.386                   | 0.541 / -0.406                   | 0.545 / -0.270                     | 0.430 / -0.249                     |
| CCDC number                                                       | 2191010                          | 2191011                          | 2191012                            | 2191013                            |

## The structure of **4a**

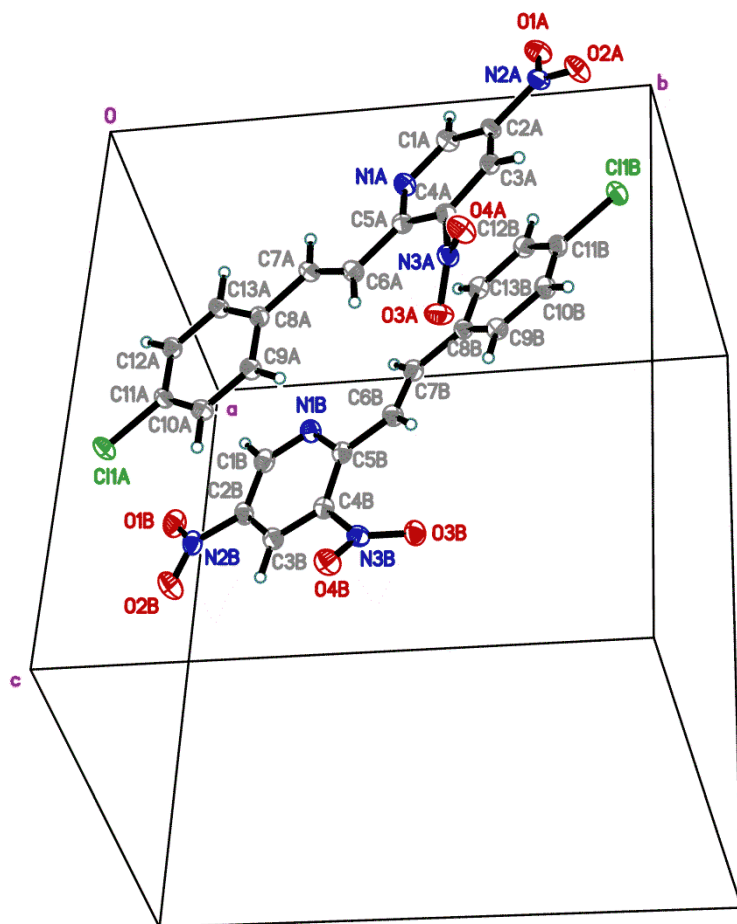

**Figure S1.** Two crystallographically non-equivalent molecules of **4a** and the unit cell.



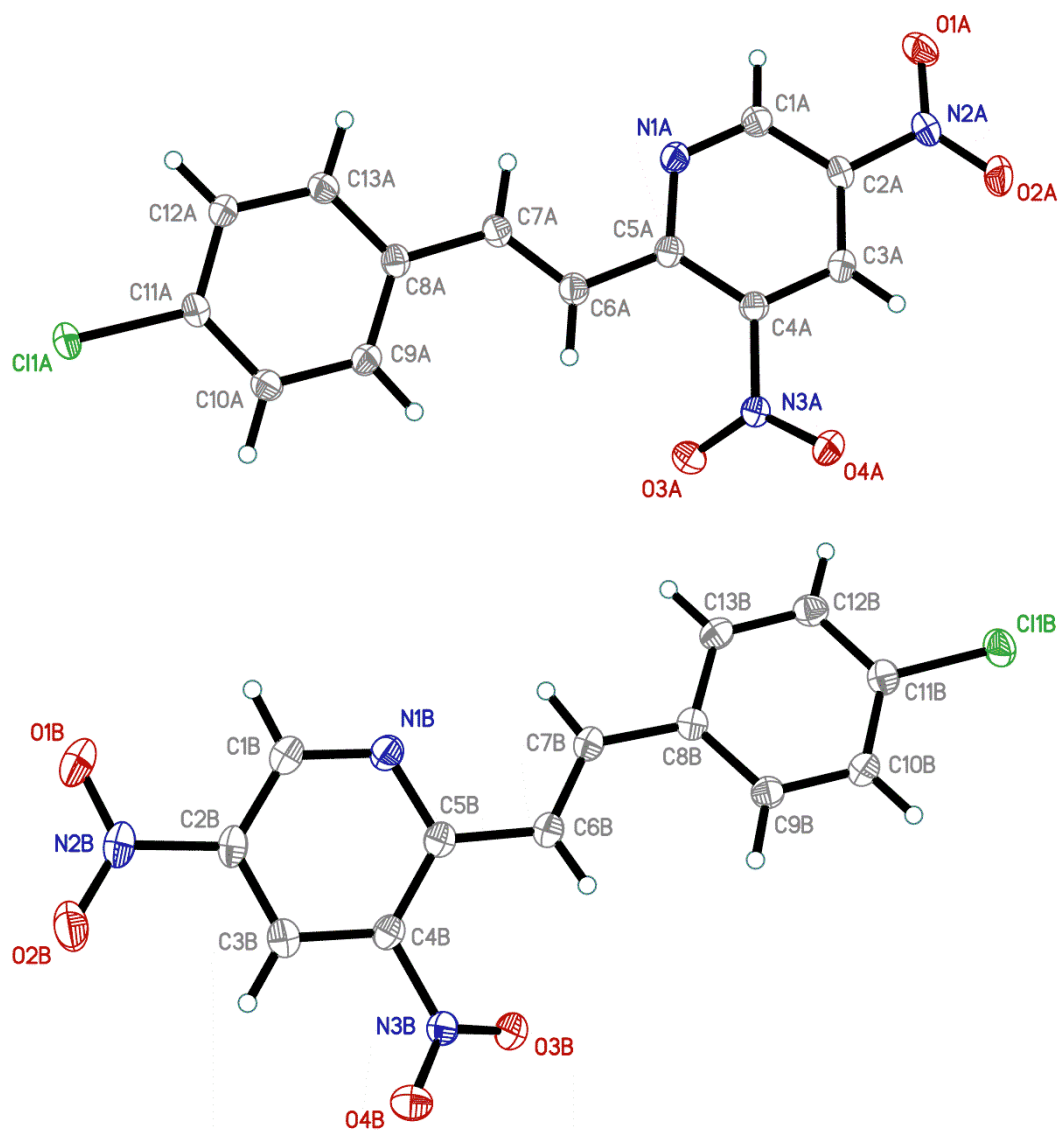

**Figure S2.** Two non-equivalent molecules of **4a**. Thermal ellipsoids are drawn at the 50% probability level.

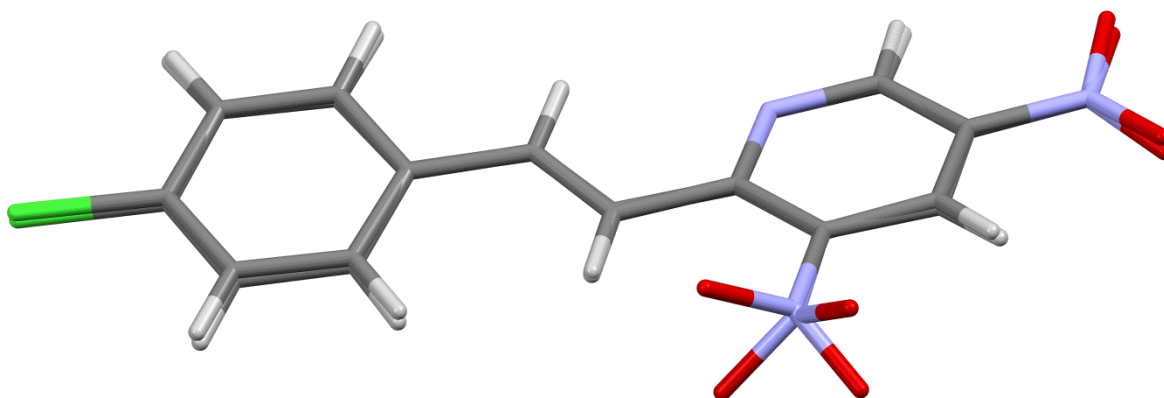

**Figure S3.** Overlay of two non-equivalent molecules of **4a**.

**Table S2.** Bond lengths (Å) in **4a**.

|           |            |           |            |           |            |
|-----------|------------|-----------|------------|-----------|------------|
| C11A-C11A | 1.7432(12) | C8A-C9A   | 1.4045(18) | C1B-C2B   | 1.395(2)   |
| O1A-N2A   | 1.2278(15) | C8A-C13A  | 1.4005(17) | C2B-C3B   | 1.3791(19) |
| O2A-N2A   | 1.2279(16) | C9A-H9A   | 0.975(18)  | C3B-H3B   | 0.968(19)  |
| O3A-N3A   | 1.2271(15) | C9A-C10A  | 1.3877(18) | C3B-C4B   | 1.3837(18) |
| O4A-N3A   | 1.2239(15) | C10A-H10A | 0.963(19)  | C4B-C5B   | 1.4064(18) |
| N1A-C1A   | 1.3229(17) | C10A-C11A | 1.3927(18) | C5B-C6B   | 1.4635(17) |
| N1A-C5A   | 1.3574(16) | C11A-C12A | 1.3886(17) | C6B-H6B   | 0.910(19)  |
| N2A-C2A   | 1.4613(16) | C12A-H12A | 0.958(19)  | C6B-C7B   | 1.3438(19) |
| N3A-C4A   | 1.4703(15) | C12A-C13A | 1.3851(18) | C7B-H7B   | 0.95(2)    |
| C1A-H1A   | 0.958(19)  | C13A-H13A | 0.974(19)  | C7B-C8B   | 1.4625(18) |
| C1A-C2A   | 1.3958(18) | C11B-C11B | 1.7392(13) | C8B-C9B   | 1.4042(18) |
| C2A-C3A   | 1.3718(18) | O1B-N2B   | 1.2289(16) | C8B-C13B  | 1.4026(18) |
| C3A-H3A   | 0.928(18)  | O2B-N2B   | 1.2252(17) | C9B-H9B   | 0.979(19)  |
| C3A-C4A   | 1.3852(17) | O3B-N3B   | 1.2267(15) | C9B-C10B  | 1.3872(18) |
| C4A-C5A   | 1.4103(17) | O4B-N3B   | 1.2262(15) | C10B-H10B | 0.922(18)  |
| C5A-C6A   | 1.4611(17) | N1B-C1B   | 1.3250(18) | C10B-C11B | 1.3947(18) |
| C6A-H6A   | 0.941(18)  | N1B-C5B   | 1.3555(17) | C11B-C12B | 1.3903(19) |
| C6A-C7A   | 1.3402(18) | N2B-C2B   | 1.4601(16) | C12B-H12B | 0.933(19)  |
| C7A-H7A   | 0.965(19)  | N3B-C4B   | 1.4710(16) | C12B-C13B | 1.3847(19) |
| C7A-C8A   | 1.4660(17) | C1B-H1B   | 0.981(19)  | C13B-H13B | 0.942(18)  |

**The structure of 4i**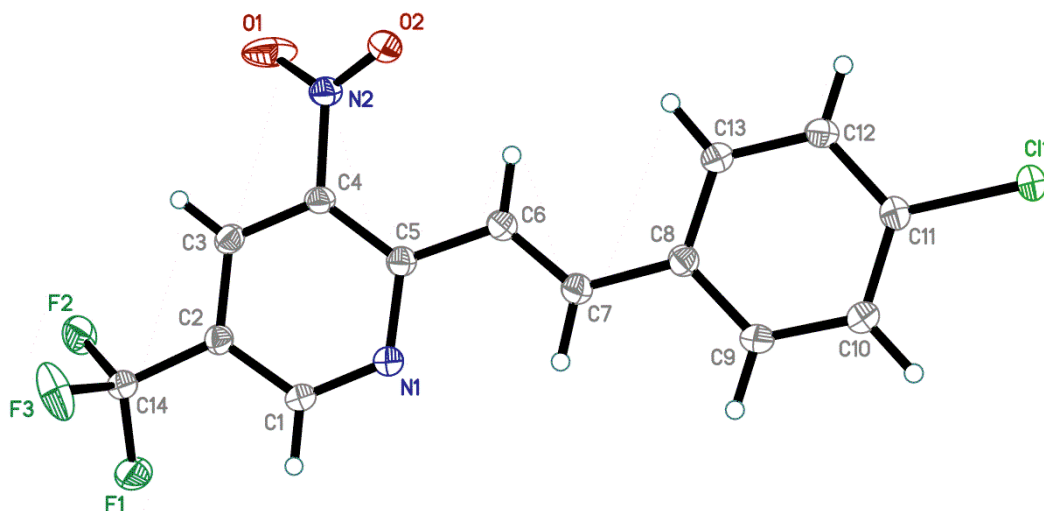**Figure S4.** The structure of **4i**. Thermal ellipsoids are drawn at the 50% probability level.**Table S3.** Bond lengths (Å) in **4i**.

|         |            |        |          |         |          |
|---------|------------|--------|----------|---------|----------|
| C11-C11 | 1.7418(16) | C2-C3  | 1.381(2) | C8-C9   | 1.398(2) |
| F1-C14  | 1.3333(18) | C2-C14 | 1.493(2) | C8-C13  | 1.407(2) |
| F2-C14  | 1.3358(18) | C3-H3  | 0.90(3)  | C9-H9   | 0.97(3)  |
| F3-C14  | 1.3346(19) | C3-C4  | 1.384(2) | C9-C10  | 1.384(2) |
| O1-N2   | 1.220(2)   | C4-C5  | 1.414(2) | C10-H10 | 0.96(2)  |
| O2-N2   | 1.219(2)   | C5-C6  | 1.461(2) | C10-C11 | 1.391(2) |

|       |            |       |          |         |          |
|-------|------------|-------|----------|---------|----------|
| N1-C1 | 1.323(2)   | C6-H6 | 0.95(2)  | C11-C12 | 1.393(2) |
| N1-C5 | 1.358(2)   | C6-C7 | 1.343(2) | C12-H12 | 0.91(2)  |
| N2-C4 | 1.4772(19) | C7-H7 | 0.98(2)  | C12-C13 | 1.384(2) |
| C1-H1 | 0.94(2)    | C7-C8 | 1.465(2) | C13-H13 | 0.95(2)  |
| C1-C2 | 1.399(2)   |       |          |         |          |

**The structure of 5h**

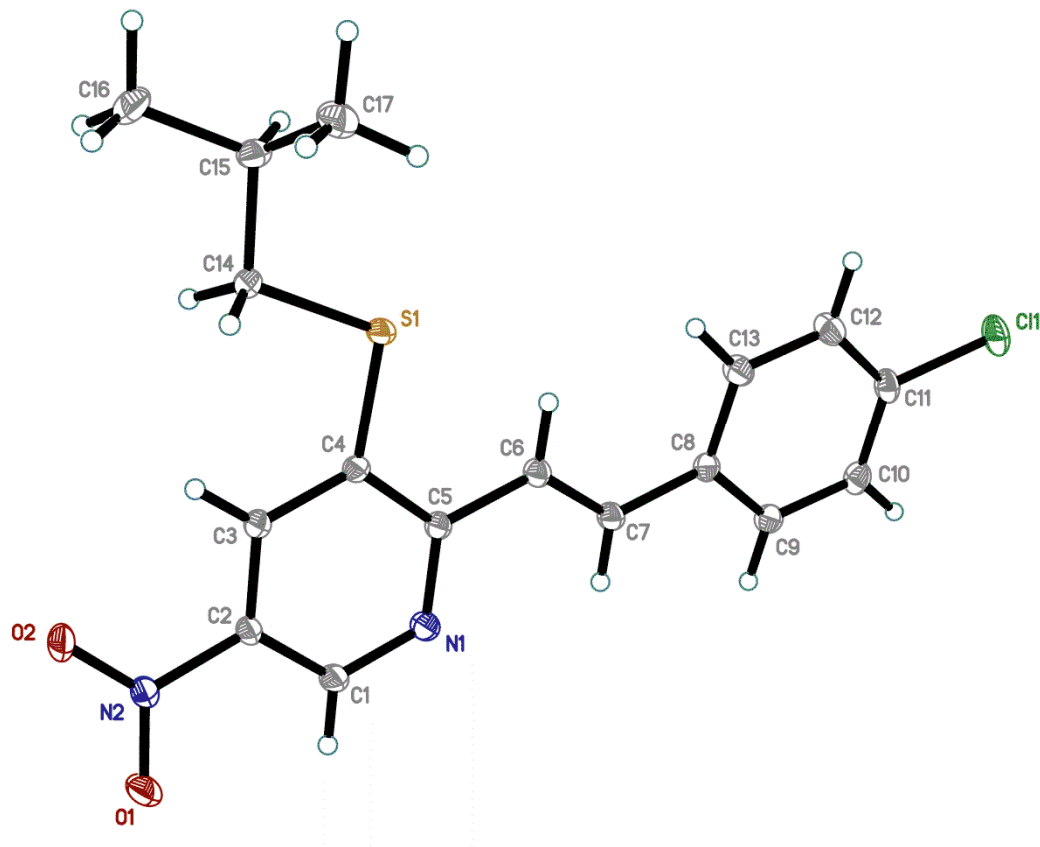

**Figure S5.** The structure of **5h**. Thermal ellipsoids are drawn at the 50% probability level.

**Table S4.** Bond lengths (Å) in **5h**.

|         |            |         |            |          |            |
|---------|------------|---------|------------|----------|------------|
| C11-C11 | 1.7395(9)  | C5-C6   | 1.4609(12) | C13-H13  | 0.959(16)  |
| S1-C4   | 1.7530(9)  | C6-C7   | 1.3446(12) | C14-C15  | 1.5336(13) |
| S1-C14  | 1.8093(9)  | C6-H6   | 0.953(14)  | C14-H14A | 0.990(13)  |
| O1-N2   | 1.2302(11) | C7-C8   | 1.4647(12) | C14-H14B | 1.008(14)  |
| O2-N2   | 1.2259(10) | C7-H7   | 0.929(15)  | C15-C17  | 1.5234(15) |
| N1-C1   | 1.3338(12) | C8-C9   | 1.4020(12) | C15-C16  | 1.5241(15) |
| N1-C5   | 1.3464(11) | C8-C13  | 1.4025(13) | C15-H15  | 0.985(15)  |
| N2-C2   | 1.4606(11) | C9-C10  | 1.3934(13) | C16-H16A | 0.969(18)  |
| C1-C2   | 1.3884(12) | C9-H9   | 0.946(14)  | C16-H16B | 0.945(19)  |
| C1-H1   | 0.909(15)  | C10-C11 | 1.3833(14) | C16-H16C | 1.07(2)    |
| C2-C3   | 1.3834(12) | C10-H10 | 0.948(15)  | C17-H17A | 0.991(16)  |
| C3-C4   | 1.3937(12) | C11-C12 | 1.3910(13) | C17-H17B | 0.967(19)  |
| C3-H3   | 0.961(14)  | C12-H12 | 0.956(16)  | C17-H17C | 1.000(17)  |

|       |            |         |            |  |
|-------|------------|---------|------------|--|
| C4-C5 | 1.4240(12) | C12-C13 | 1.3858(13) |  |
|-------|------------|---------|------------|--|

**The structure of 5l**

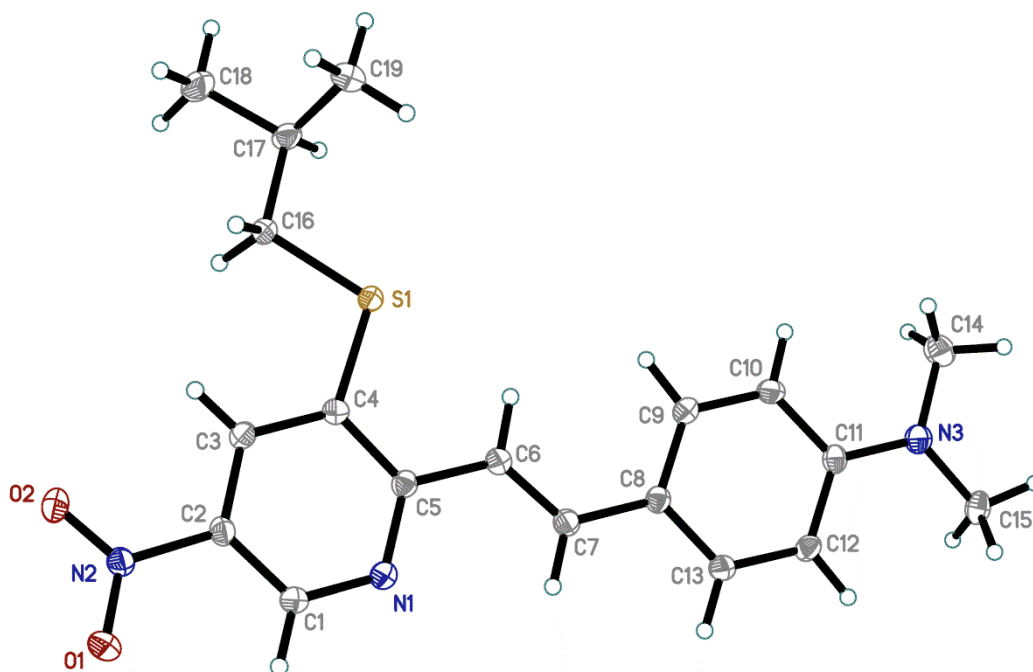

**Figure S6.** The structure of **5l**. Thermal ellipsoids are drawn at the 50% probability level.

**Table S5.** Bond lengths (Å) in **5l**.

|        |            |          |            |          |            |
|--------|------------|----------|------------|----------|------------|
| S1-C4  | 1.7579(11) | C6-H6    | 0.963(15)  | C15-H15A | 0.99(2)    |
| S1-C16 | 1.8147(10) | C6-C7    | 1.3493(15) | C15-H15B | 1.009(18)  |
| O1-N2  | 1.2306(12) | C7-H7    | 0.953(15)  | C15-H15C | 0.958(18)  |
| O2-N2  | 1.2276(12) | C7-C8    | 1.4525(14) | C16-H16A | 1.000(15)  |
| N1-C1  | 1.3347(14) | C8-C9    | 1.4047(15) | C16-H16B | 1.013(14)  |
| N1-C5  | 1.3520(14) | C8-C13   | 1.4073(14) | C16-C17  | 1.5348(14) |
| N2-C2  | 1.4577(13) | C9-H9    | 0.968(15)  | C17-H17  | 0.975(15)  |
| N3-C11 | 1.3711(13) | C9-C10   | 1.3777(15) | C17-C18  | 1.5258(16) |
| N3-C14 | 1.4476(15) | C10-H10  | 0.950(16)  | C17-C19  | 1.5277(17) |
| N3-C15 | 1.4527(14) | C10-C11  | 1.4153(15) | C18-H18A | 0.998(18)  |
| C1-H1  | 0.940(15)  | C11-C12  | 1.4109(15) | C18-H18B | 0.974(18)  |
| C1-C2  | 1.3882(14) | C12-H12  | 0.965(15)  | C18-H18C | 0.990(17)  |
| C2-C3  | 1.3878(15) | C12-C13  | 1.3862(15) | C19-H19A | 0.975(18)  |
| C3-H3  | 0.917(15)  | C13-H13  | 0.962(15)  | C19-H19B | 0.977(18)  |
| C3-C4  | 1.3877(14) | C14-H14A | 0.991(19)  | C19-H19C | 1.008(18)  |
| C4-C5  | 1.4318(14) | C14-H14B | 0.964(19)  |          |            |
| C5-C6  | 1.4511(14) | C14-H14C | 0.994(16)  |          |            |

## References

- S1. M.-C. Liu, T.-S. Lin, A. C. Sartorelli, *Synth. Commun.*, 1990, **20**, 2965.
- S2. C. D. Jones, R. William, A. Luke, W. McCoull, US Pat. 2008/0194552A1, 2008.
- S3. Bruker. APEX-III. *Bruker AXS Inc.*, Madison, Wisconsin, USA, 2019.
- S4. L. Krause, R. Herbst-Irmer, G. M. Sheldrick, D. Stalke, *J. Appl. Cryst.*, 2015, **48**, 3.
- S5. CrysAlisPro. Version 1.171.41.106a. *Rigaku Oxford Diffraction*, 2021.
- S6. G. M. Sheldrick, *Acta Cryst.*, 2015, **A71**, 3.
- S7. G. M. Sheldrick, *Acta Cryst.*, 2015, **C71**, 3.
- S8. C. F. Macrae, I. Sovago, S. J. Cottrell, P. T. A. Galek, P. McCabe, E. Pidcock, M. Platings, G. P. Shields, J. S. Stevens, M. Towler, P. A. Wood, Mercury 4.0: from visualization to analysis, design and prediction. *J. Appl. Cryst.*, 2020, **53**, 226.

## NMR spectra of synthesized compounds.

$^1\text{H}$  and  $^{13}\text{C}$  NMR spectra of compound **3b** in  $\text{CDCl}_3$

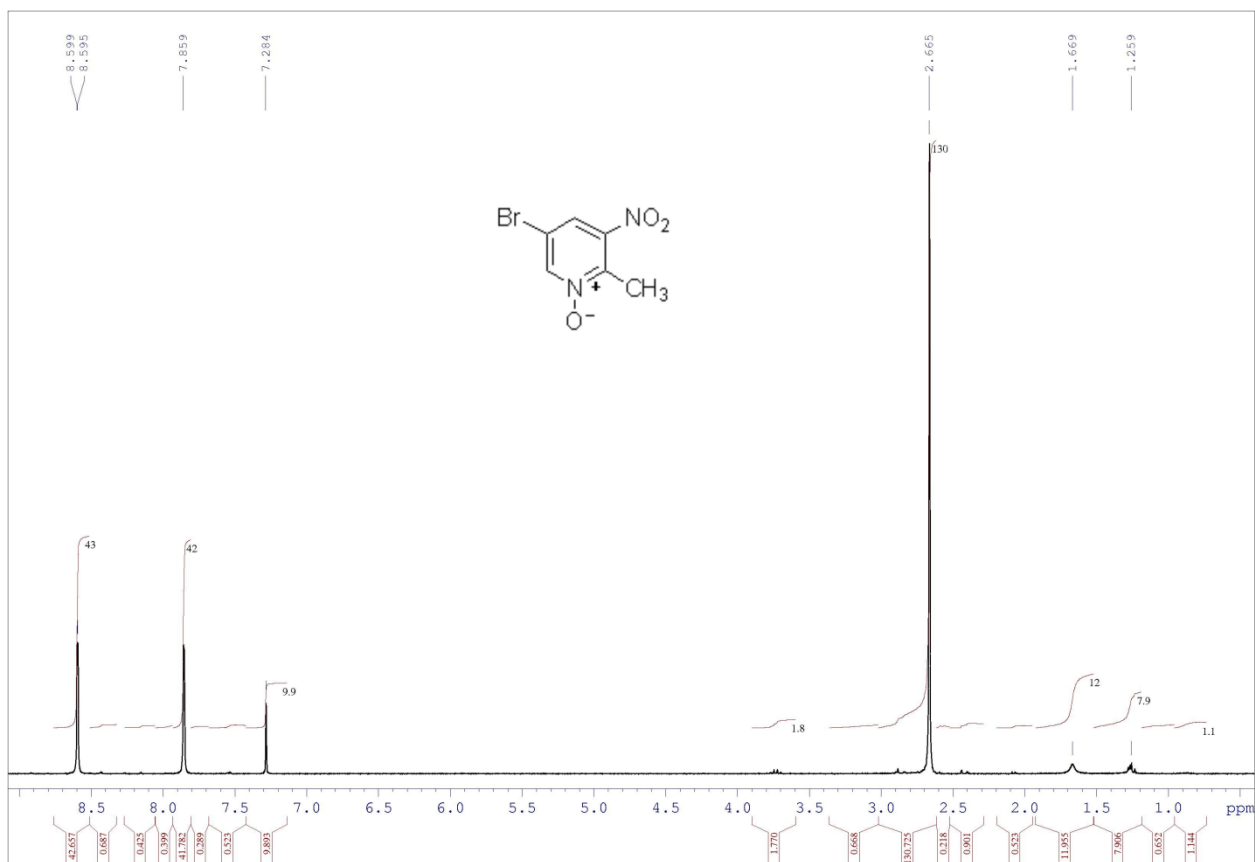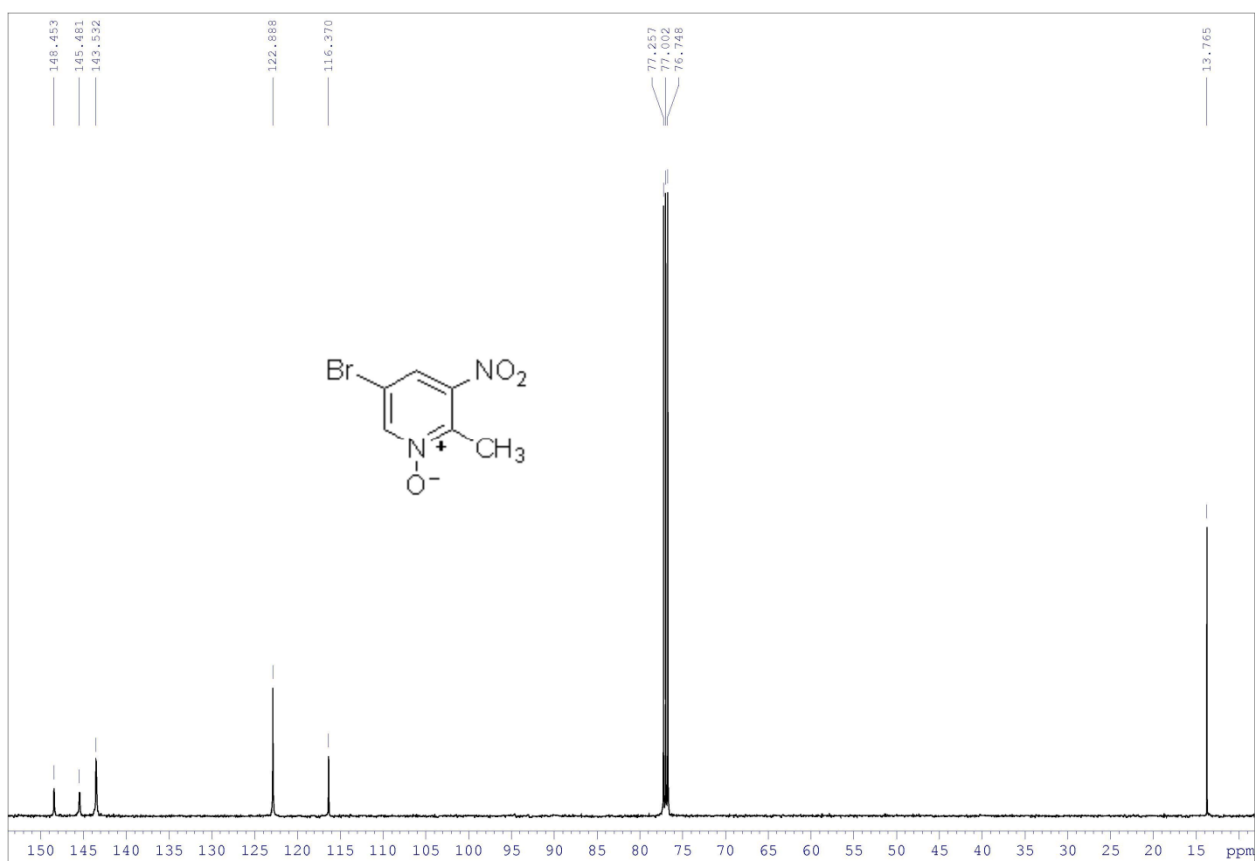

$^1\text{H}$  and  $^{13}\text{C}$  NMR spectra of compound **3c** in  $\text{CDCl}_3$

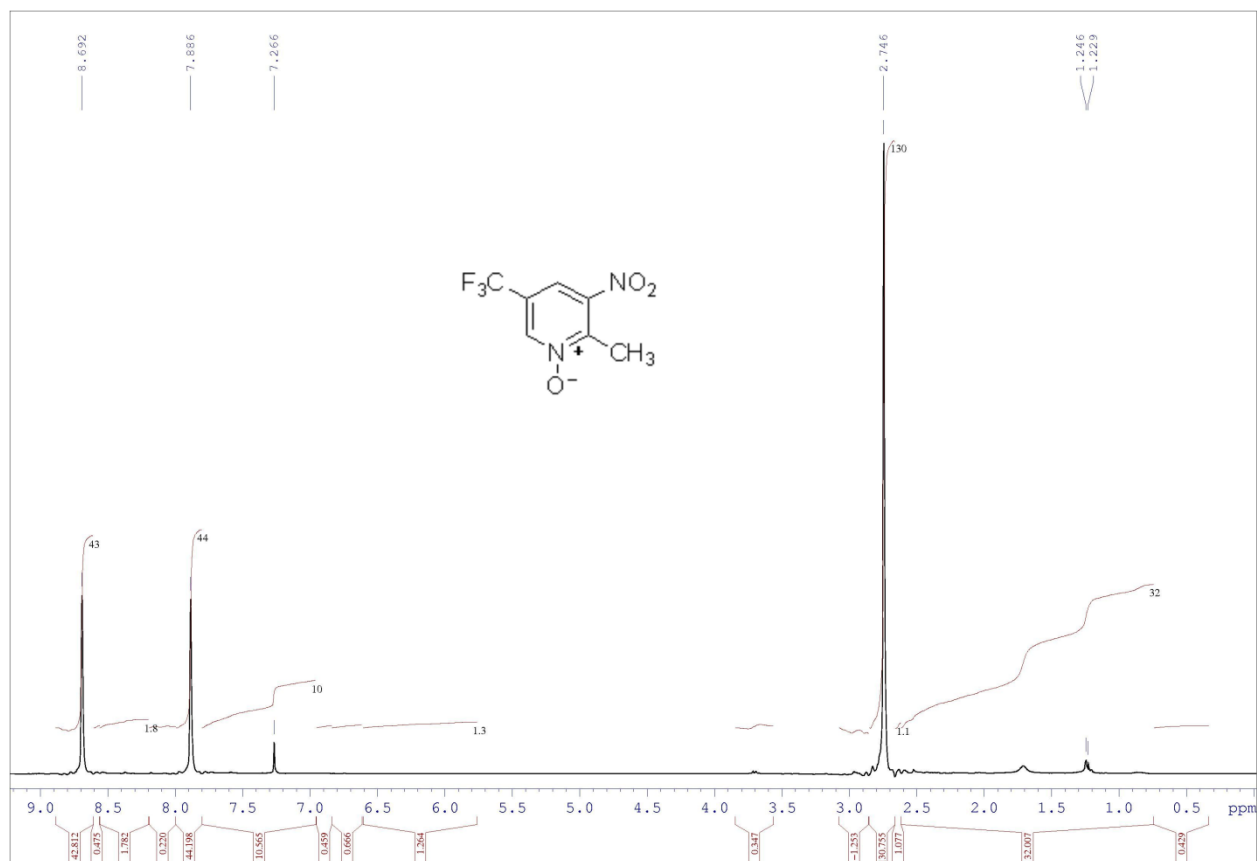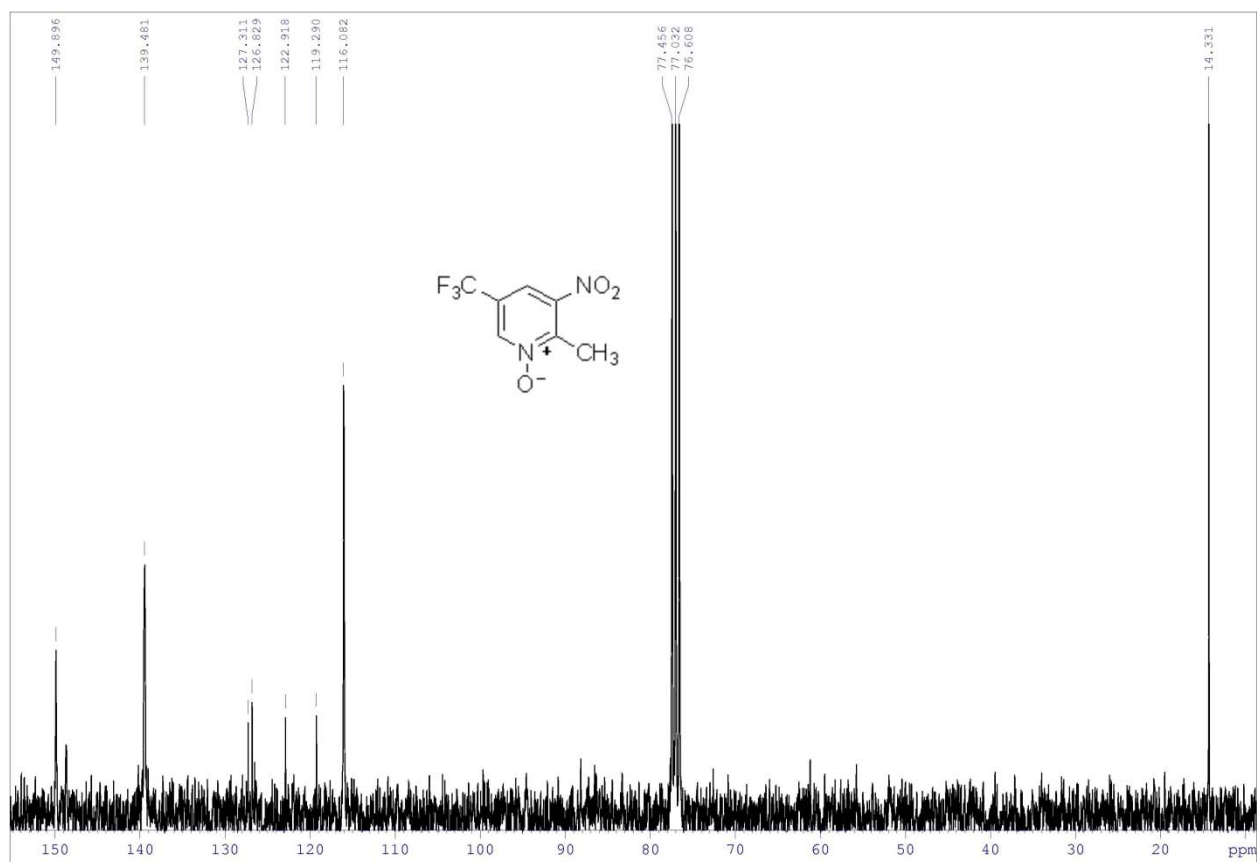

<sup>1</sup>H NMR spectrum of compound **4a** in CDCl<sub>3</sub>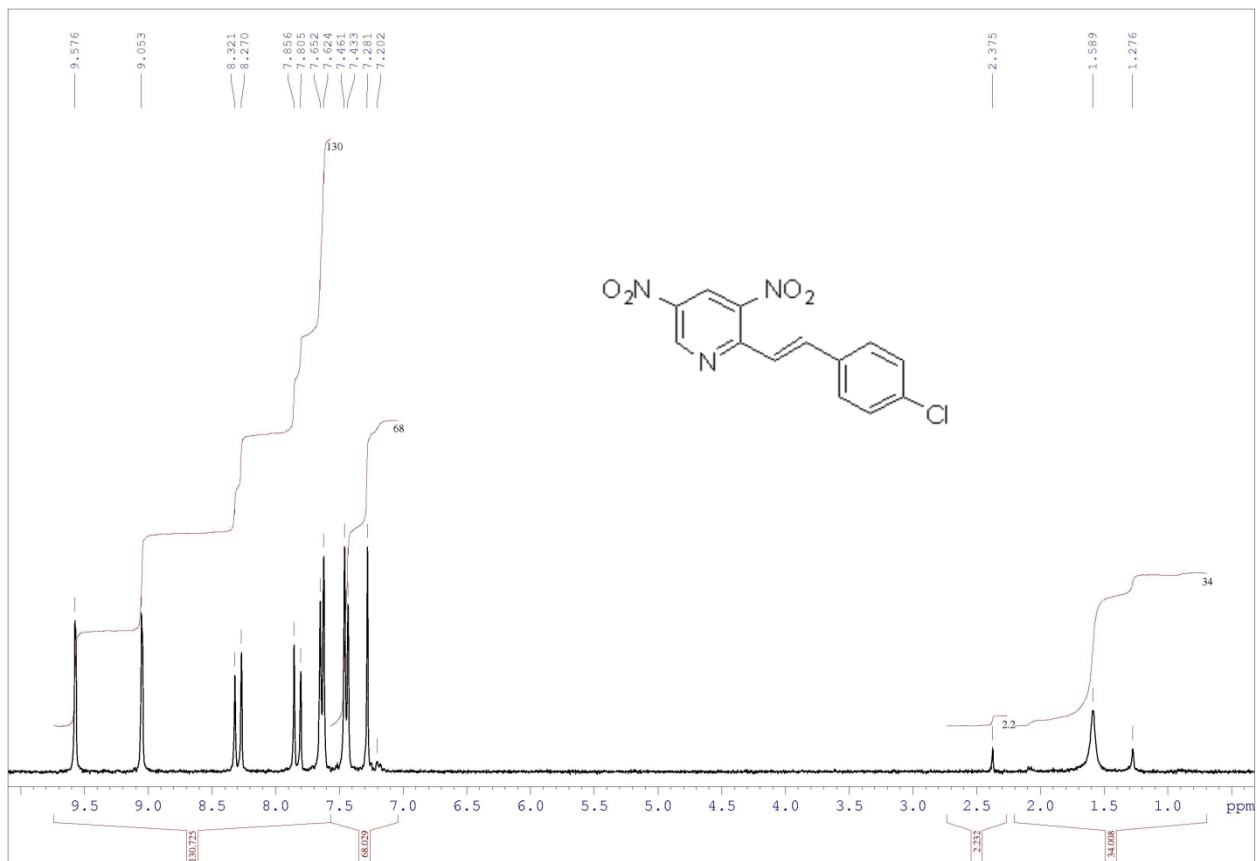 $^{13}\text{C}$  NMR spectrum of compound **4a** in DMSO- $\text{d}_6$ 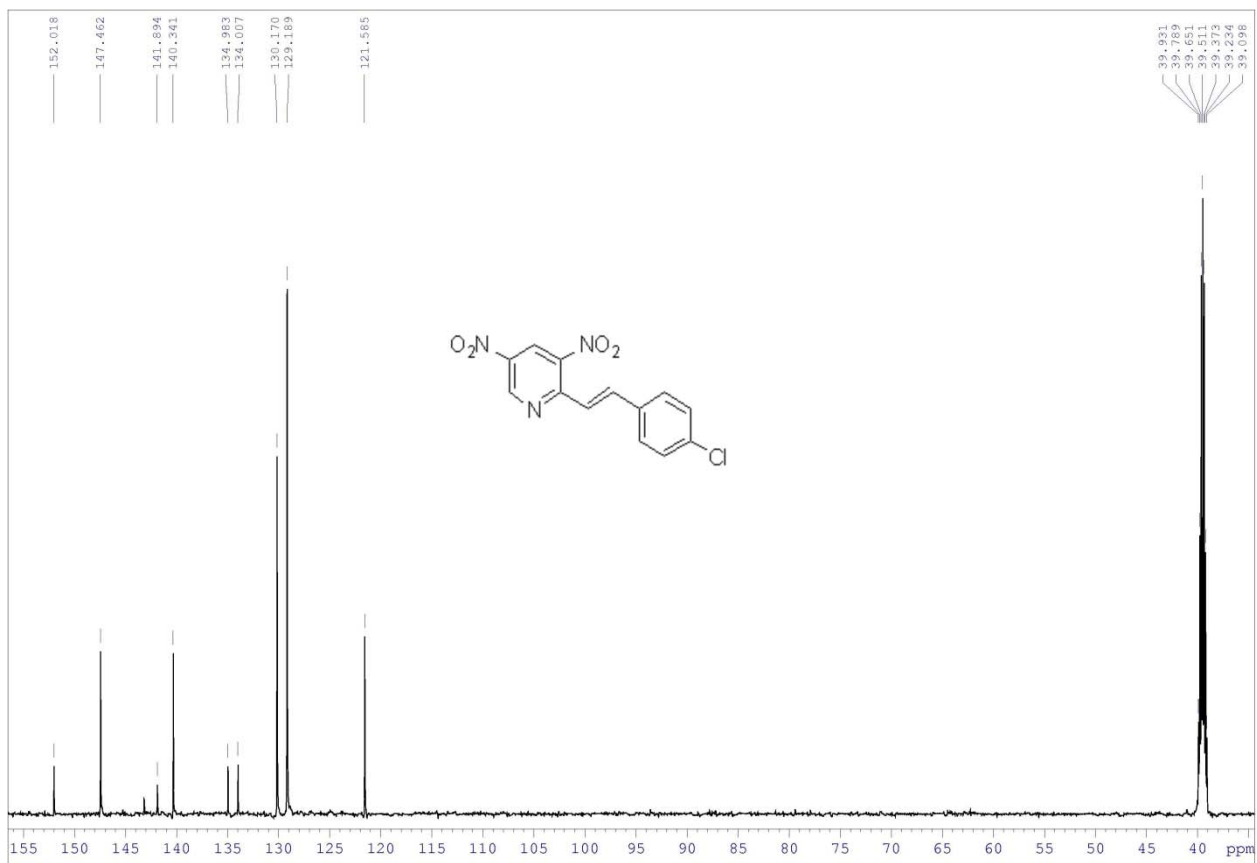



$^1\text{H}$  and  $^{13}\text{C}$  NMR spectra of compound **4b** in  $\text{CDCl}_3$

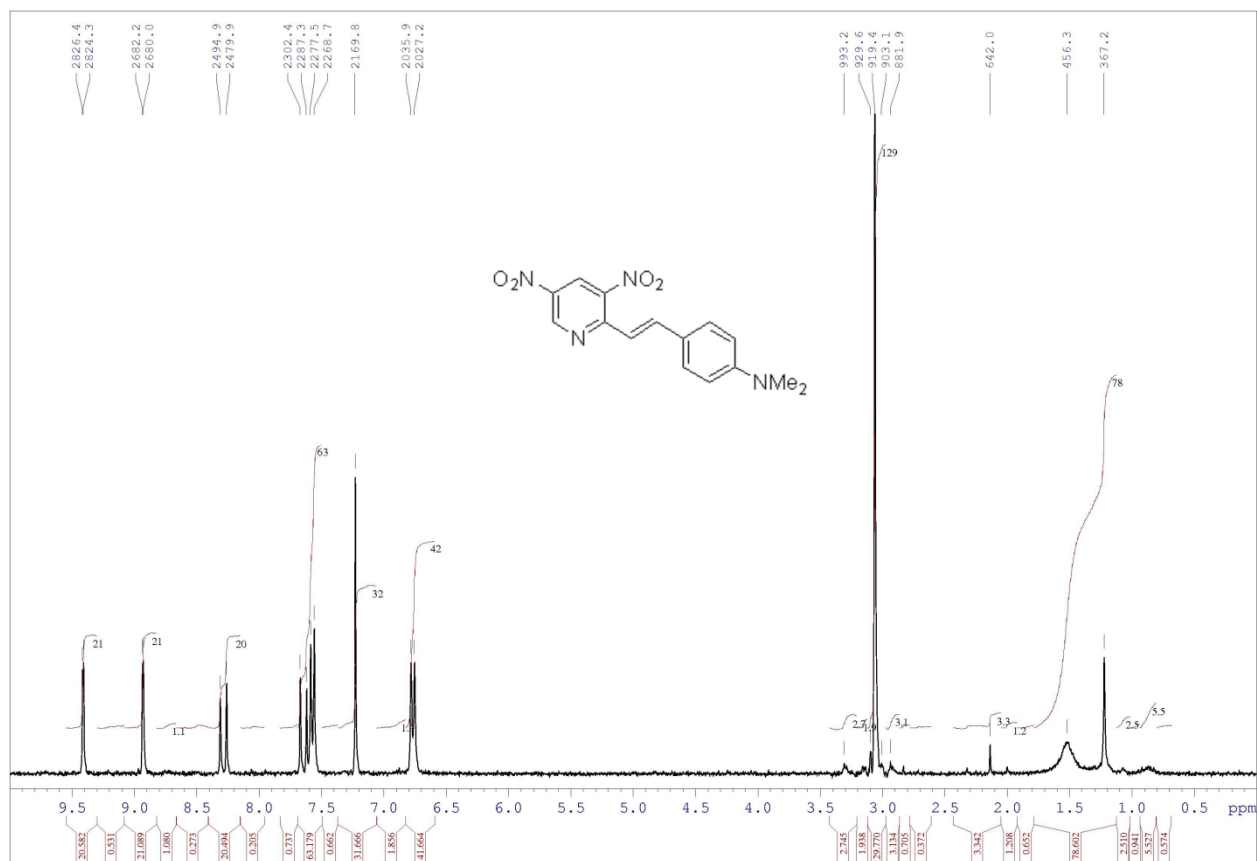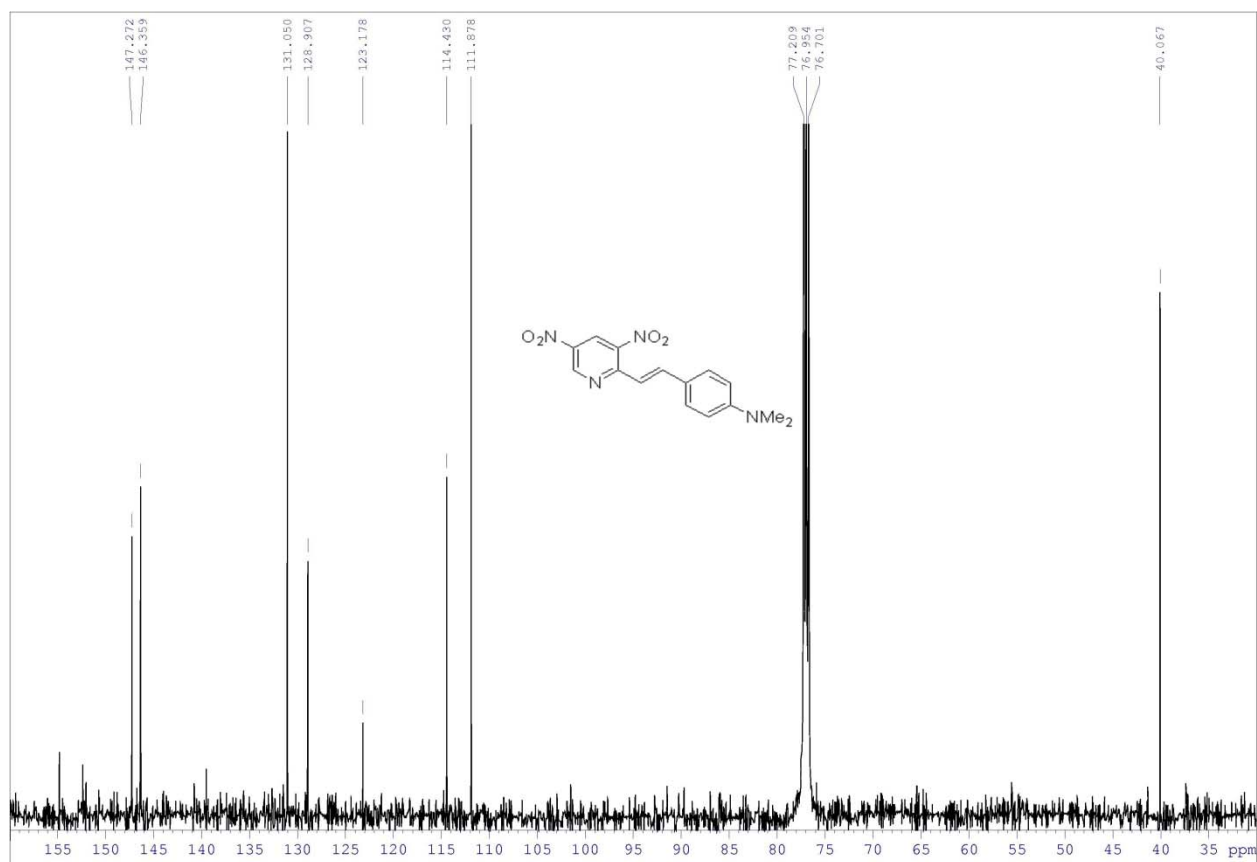

$^1\text{H}$  and  $^{13}\text{C}$  NMR spectra of compound **4c** in  $\text{CDCl}_3$

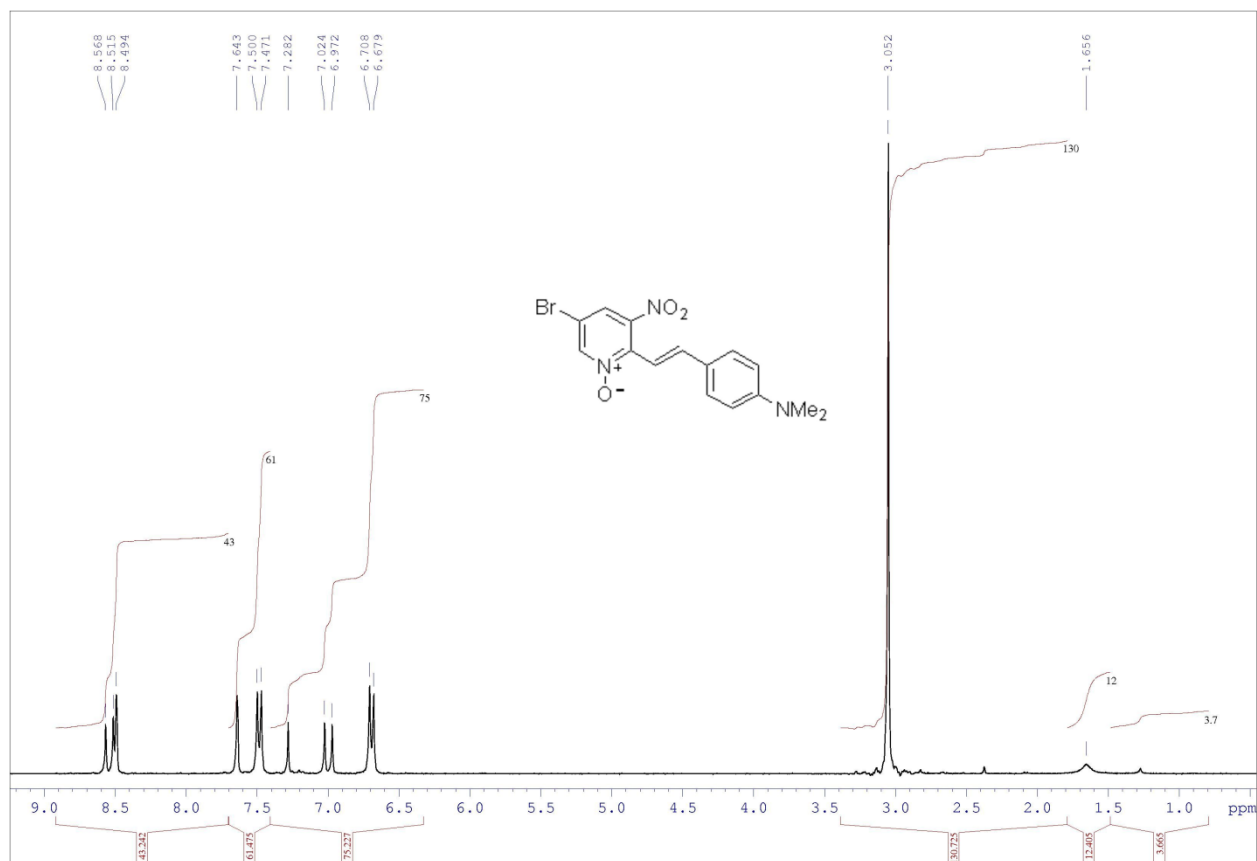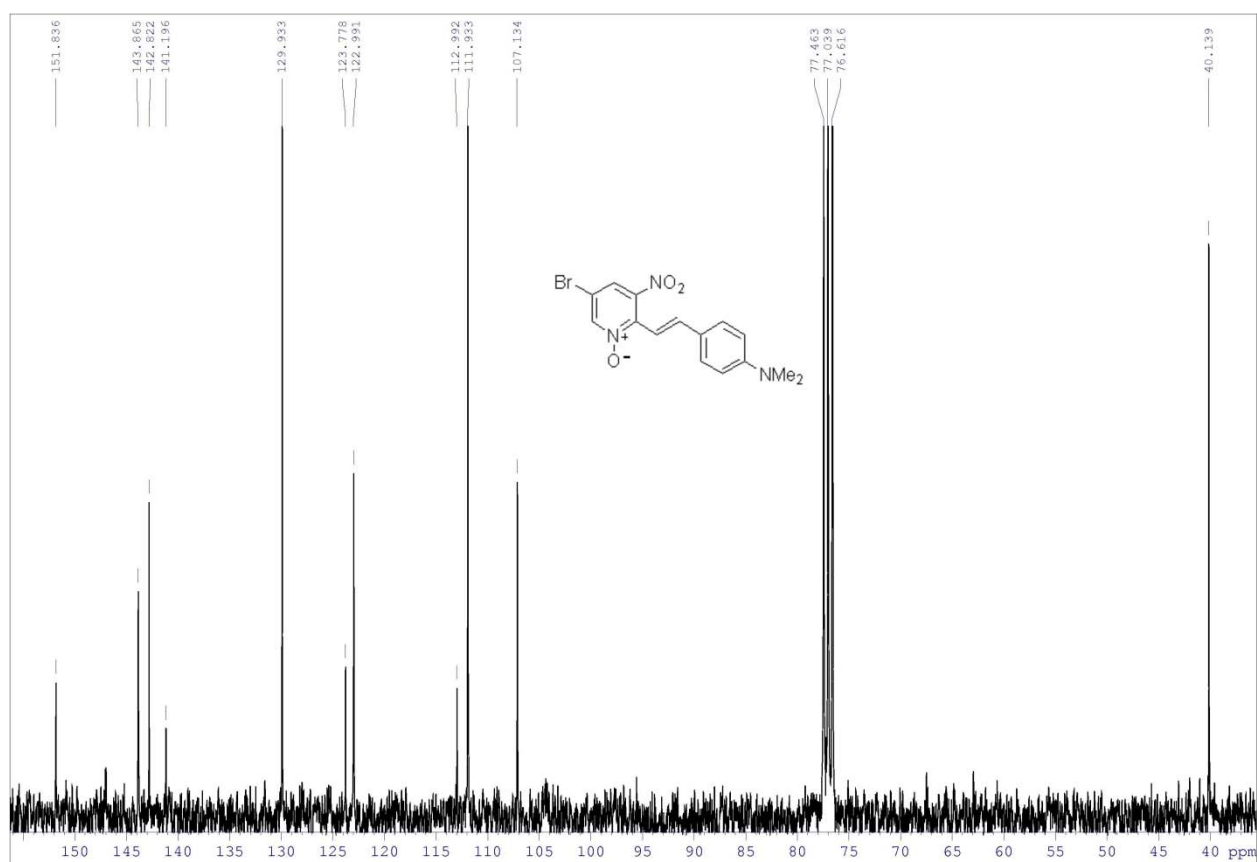

$^1\text{H}$  NMR spectrum of compound **4d** in  $\text{CDCl}_3$

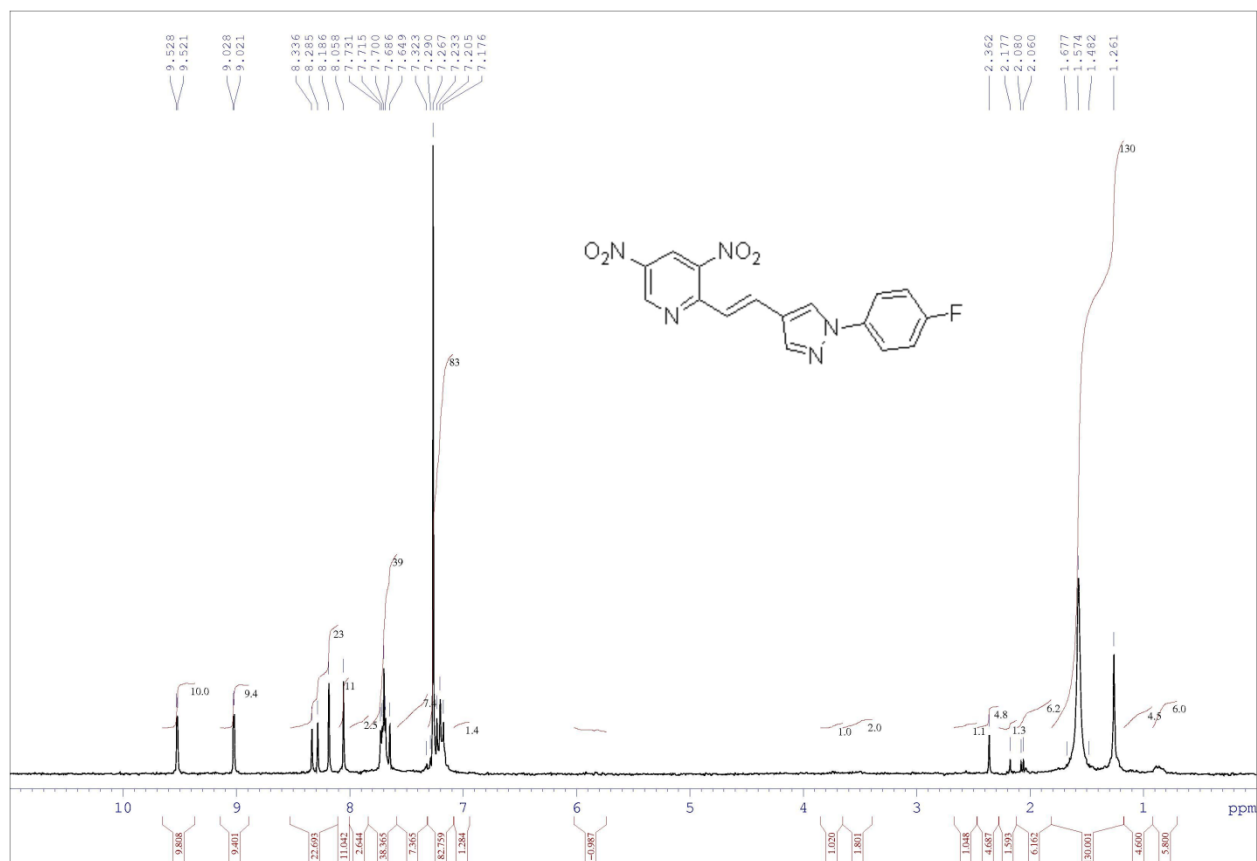

$^1\text{H}$  and  $^{13}\text{C}$  NMR spectra of compound **4e** in  $\text{CDCl}_3$

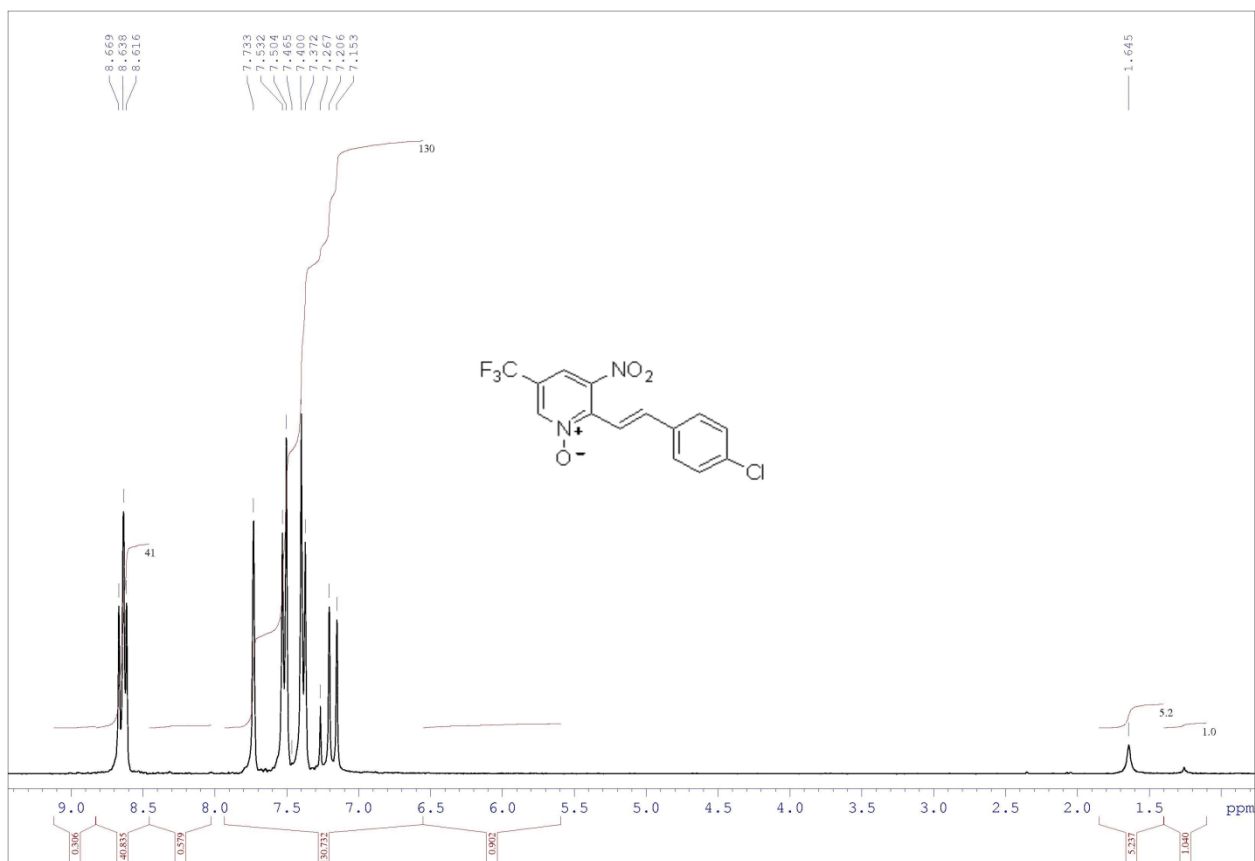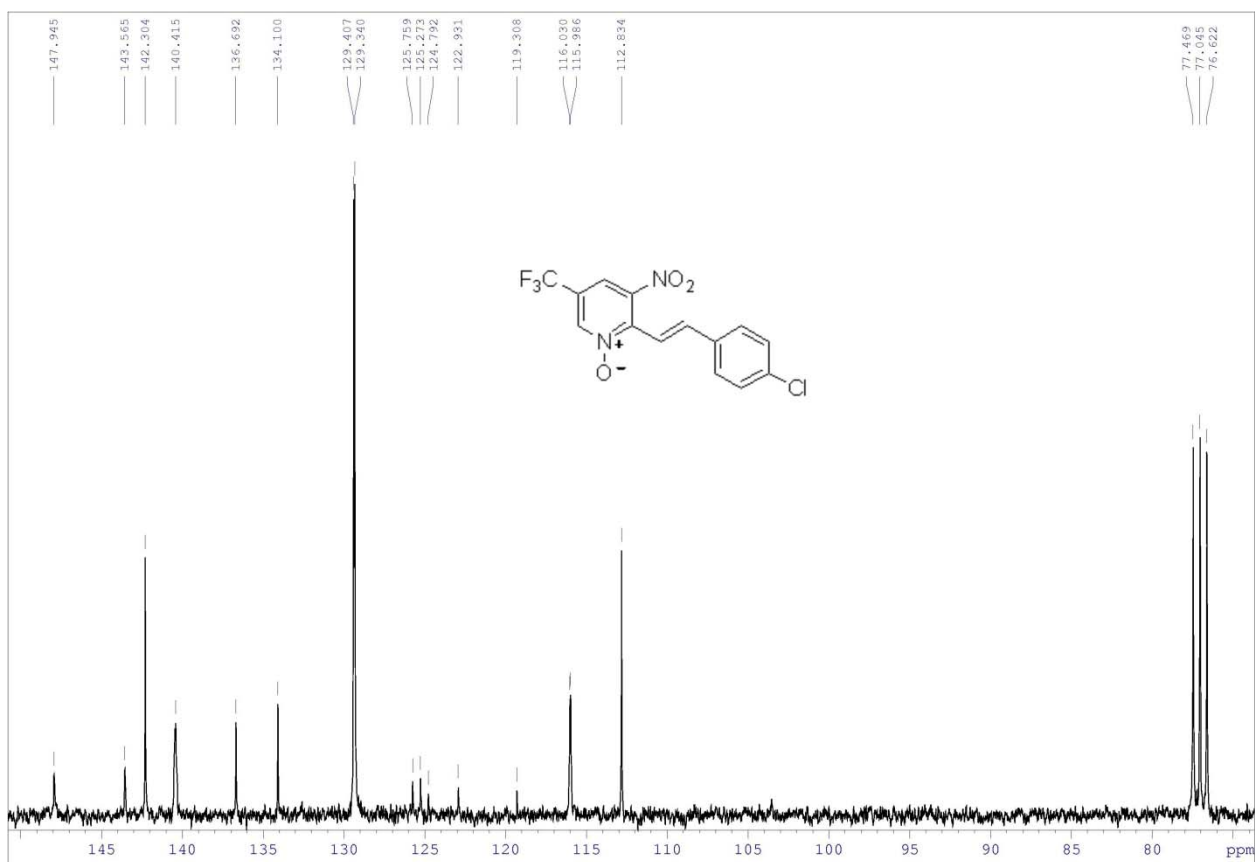

$^1\text{H}$  and  $^{13}\text{C}$  NMR spectra of compound **4f** in  $\text{CDCl}_3$

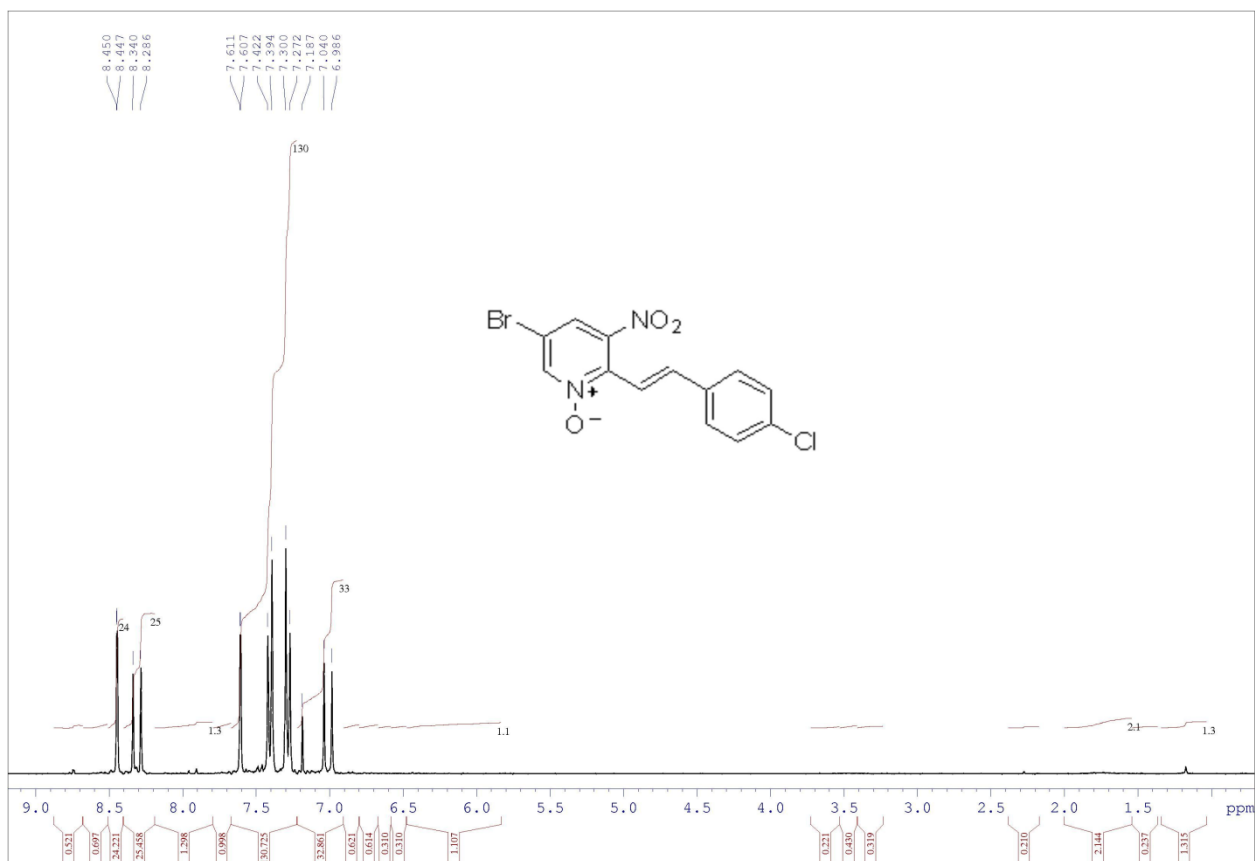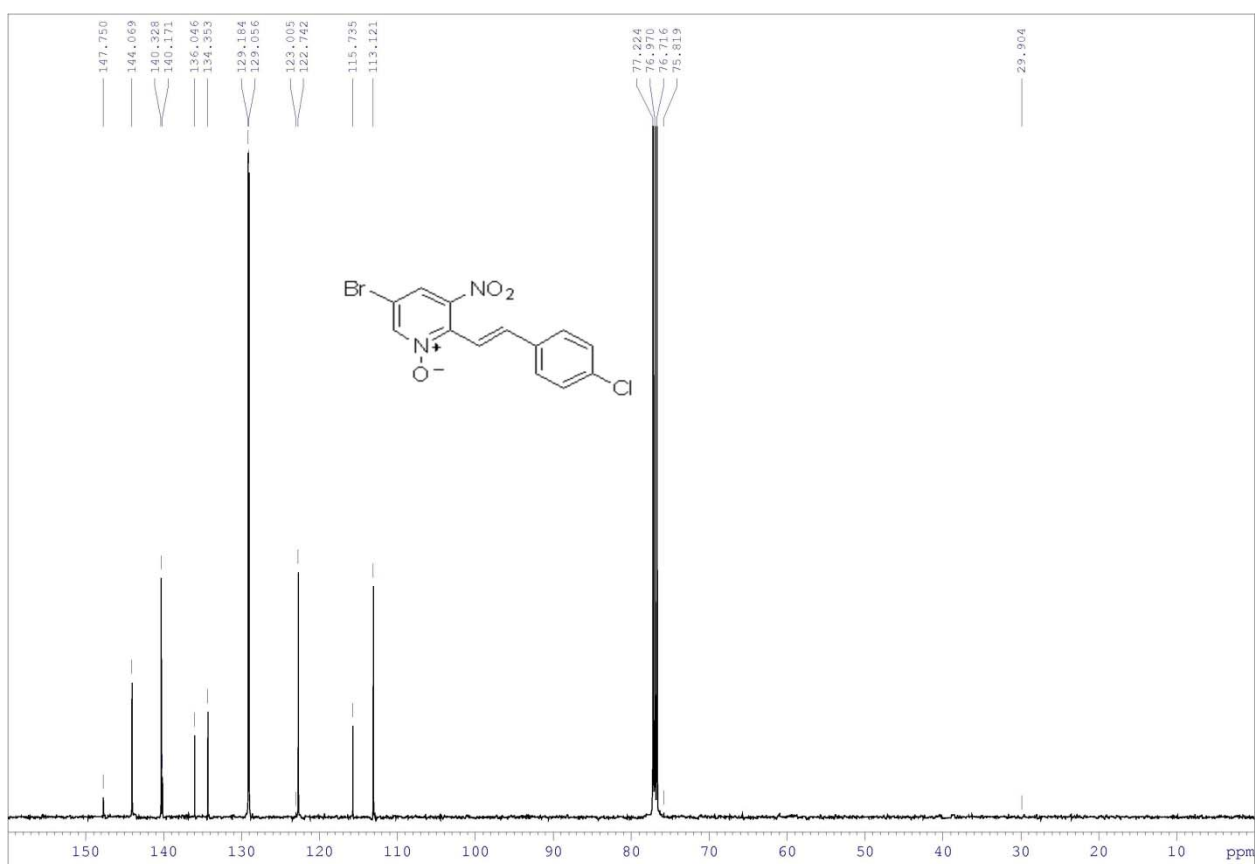

$^1\text{H}$  and  $^{13}\text{C}$  NMR spectra of compound **4g** in  $\text{CDCl}_3$

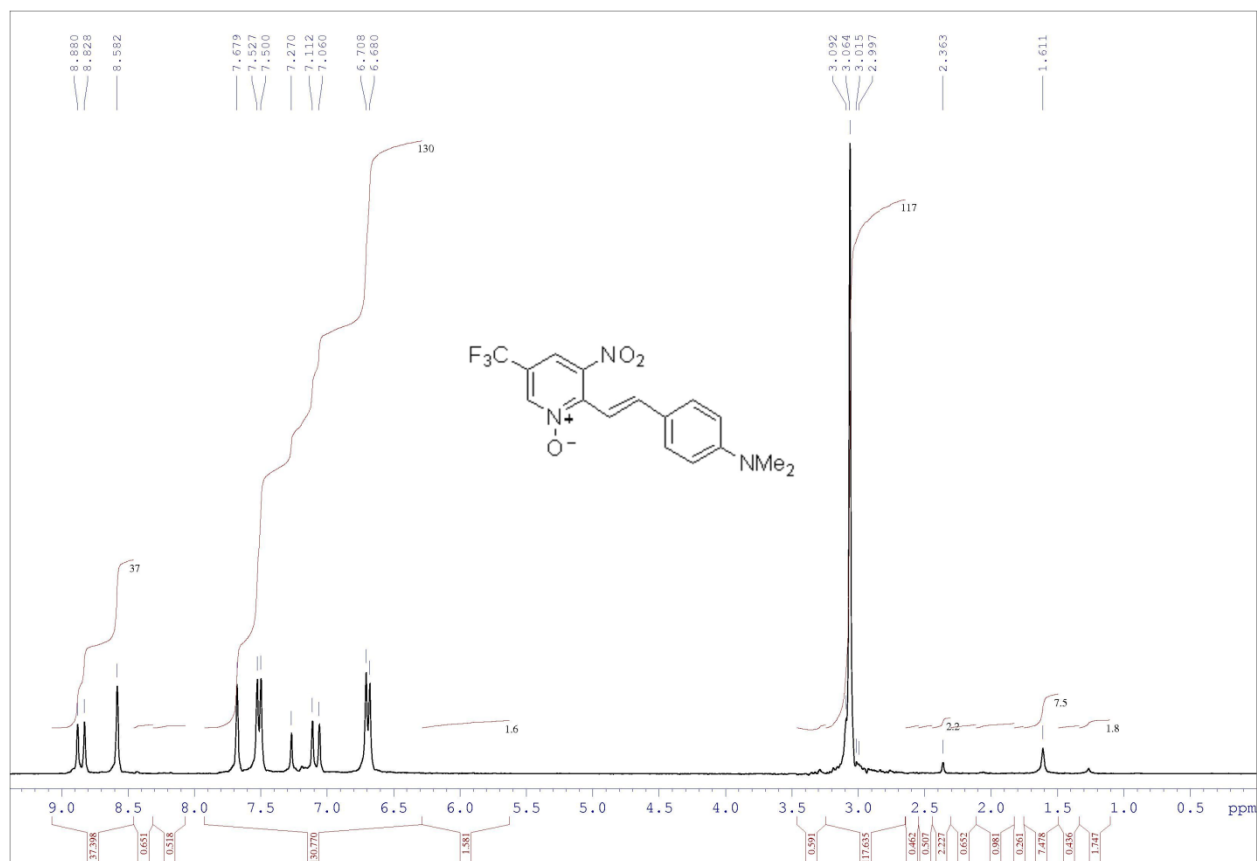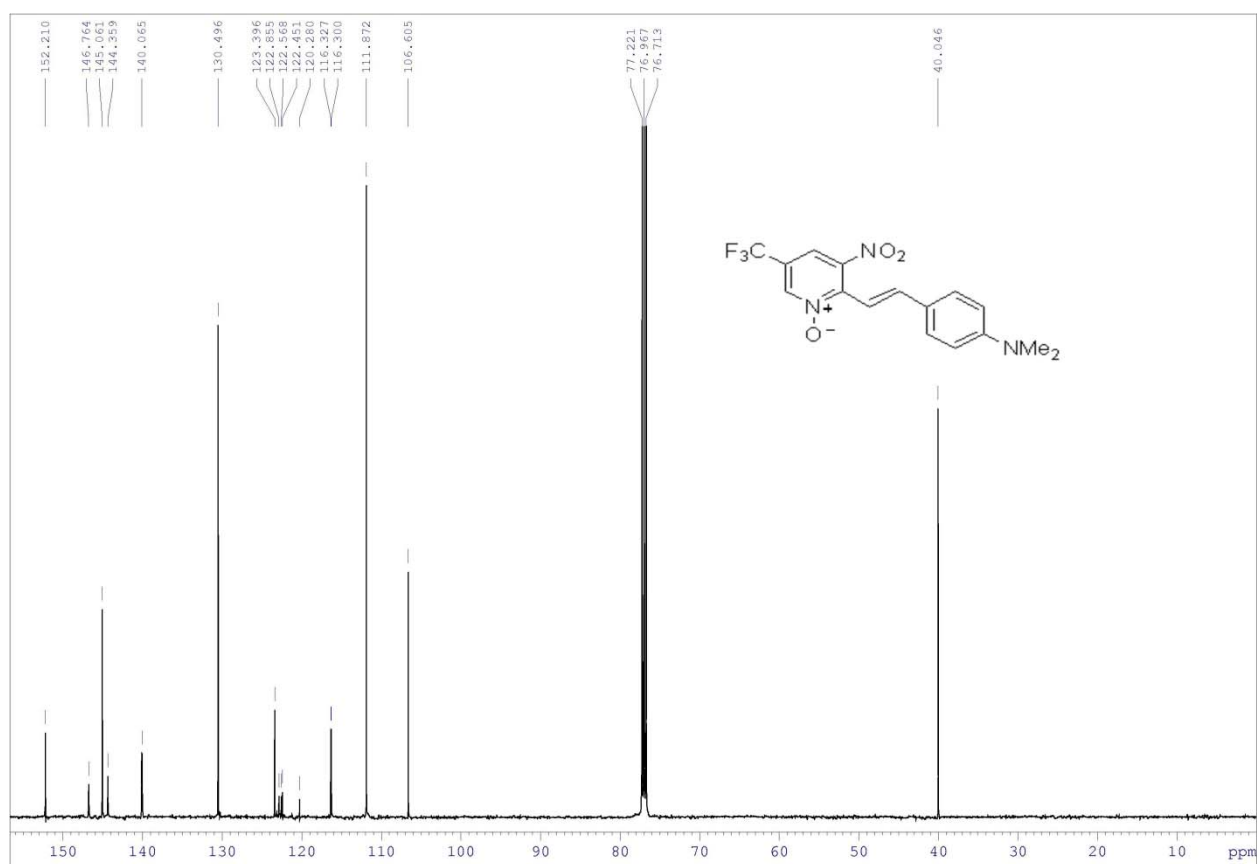

Chemical structure: CN(C)C1=CC=C(C=C1)/C=C2C=CC(=C2)Br

<sup>1</sup>H NMR spectrum (CDCl<sub>3</sub>) showing peaks and integrations:

| Chemical Shift (ppm) | Integration |
|----------------------|-------------|
| 8.748                | 20.301      |
| 8.341                | 0.394       |
| 8.091                | 20.112      |
| 8.072                | 24.079      |
| 8.021                | 0.385       |
| 7.572                | 73.037      |
| 7.548                | 0.715       |
| 7.520                | 0.588       |
| 7.268                | 45.450      |
| 6.720                | 1.455       |
| 6.692                | 0.439       |
| 4.685                | 2.993       |
| 3.040                | 1.152       |
| 2.981                | 130.783     |
| 1.265                | 0.385       |
| 1.265                | 0.893       |
| 1.265                | 0.376       |
| 1.265                | 0.429       |
| 1.265                | 0.595       |
| 1.265                | 1.583       |
| 1.265                | 18.197      |
| 1.265                | 0.625       |
| 1.265                | 1.021       |

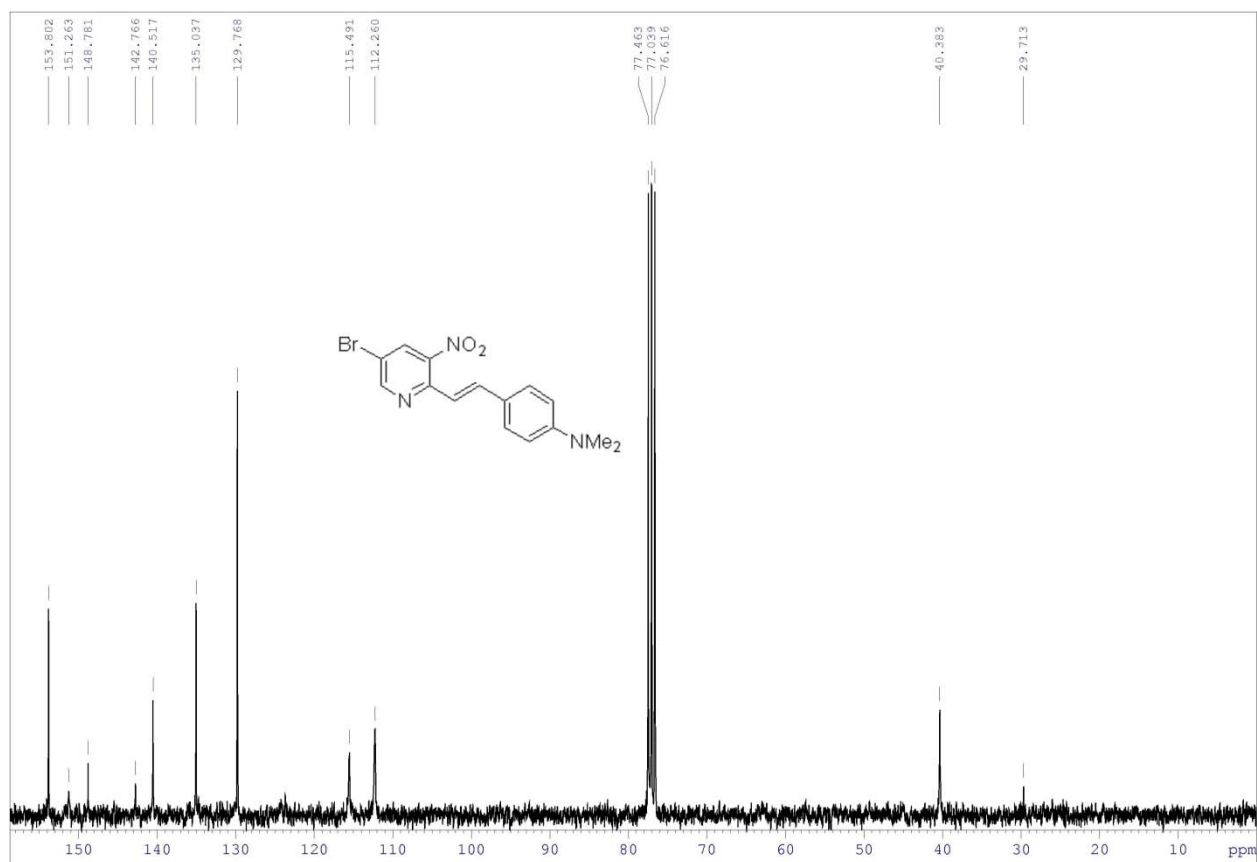

$^1\text{H}$  and  $^{13}\text{C}$  NMR spectra of compound **4i** in  $\text{CDCl}_3$

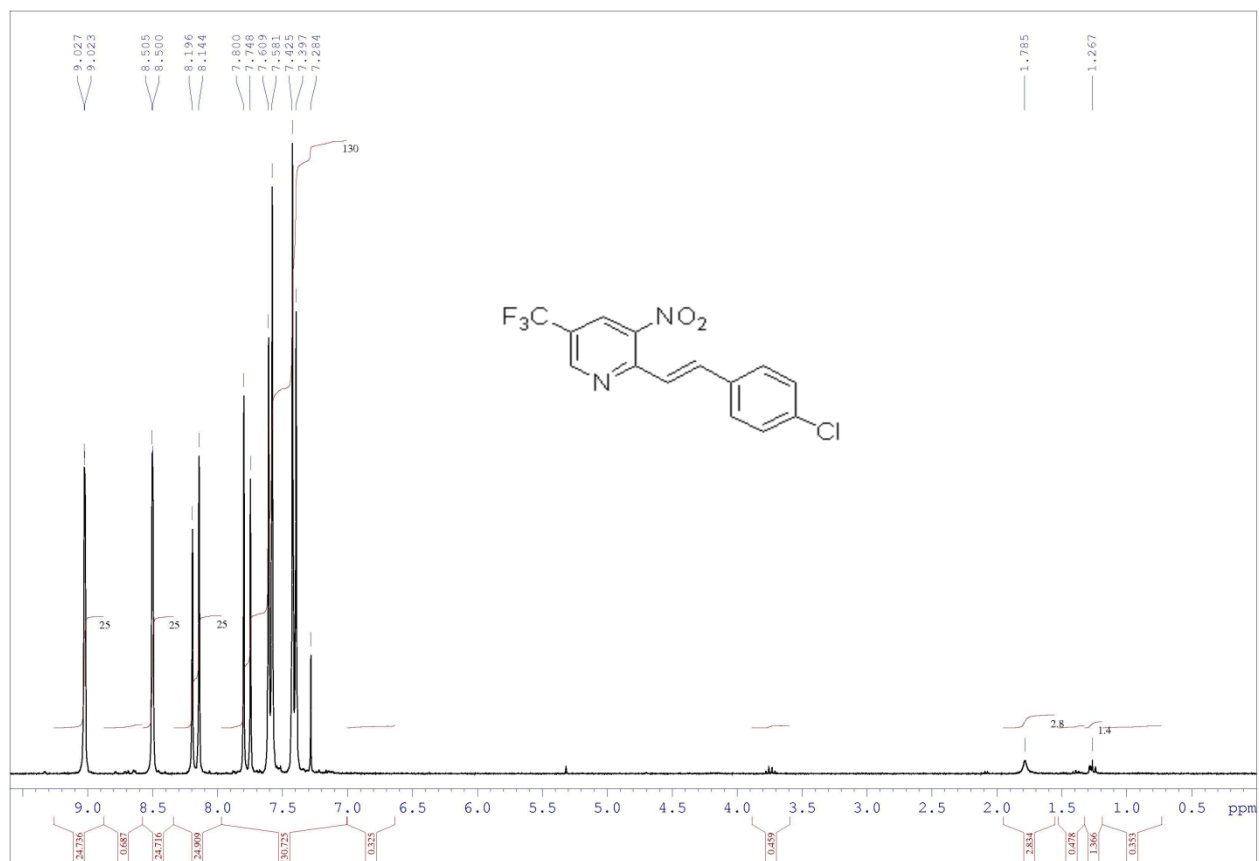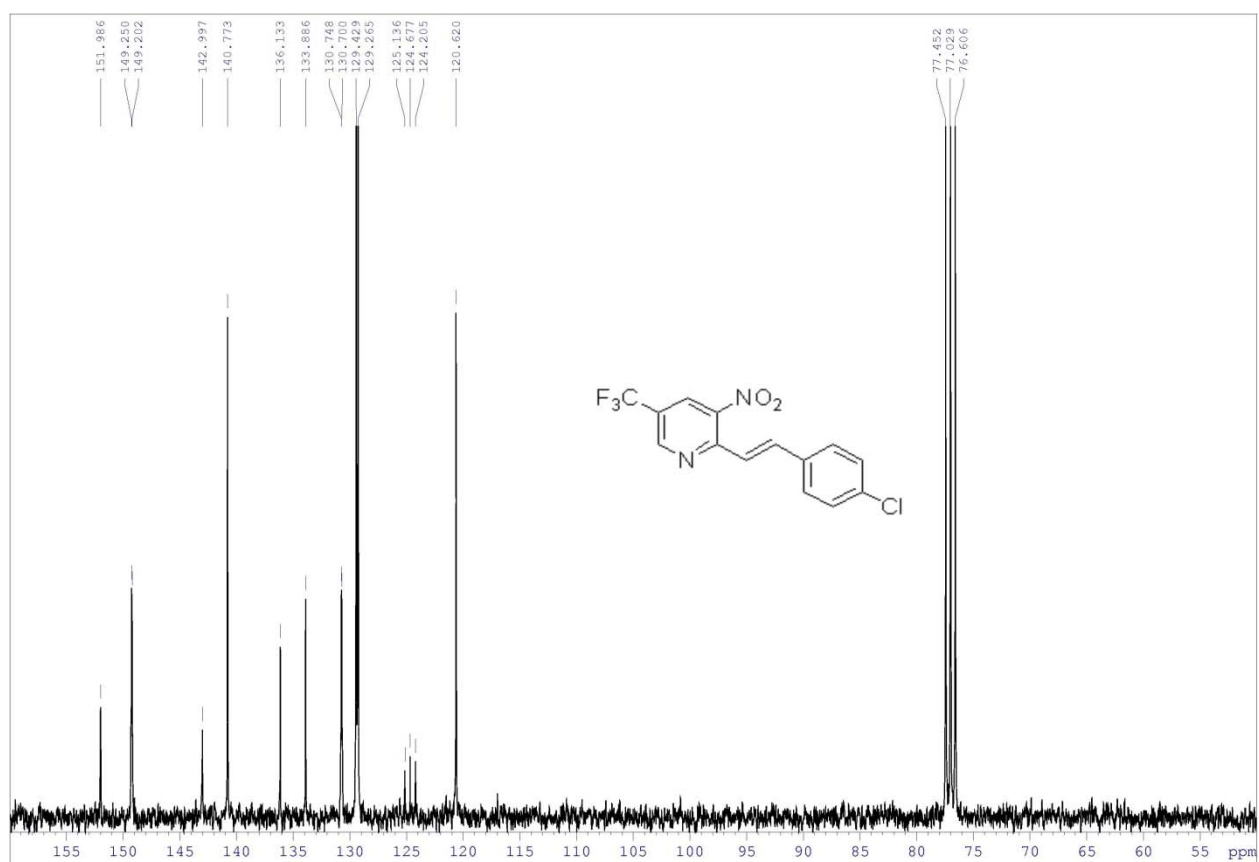



$^1\text{H}$  and  $^{13}\text{C}$  NMR spectra of compound **4j** in  $\text{CDCl}_3$

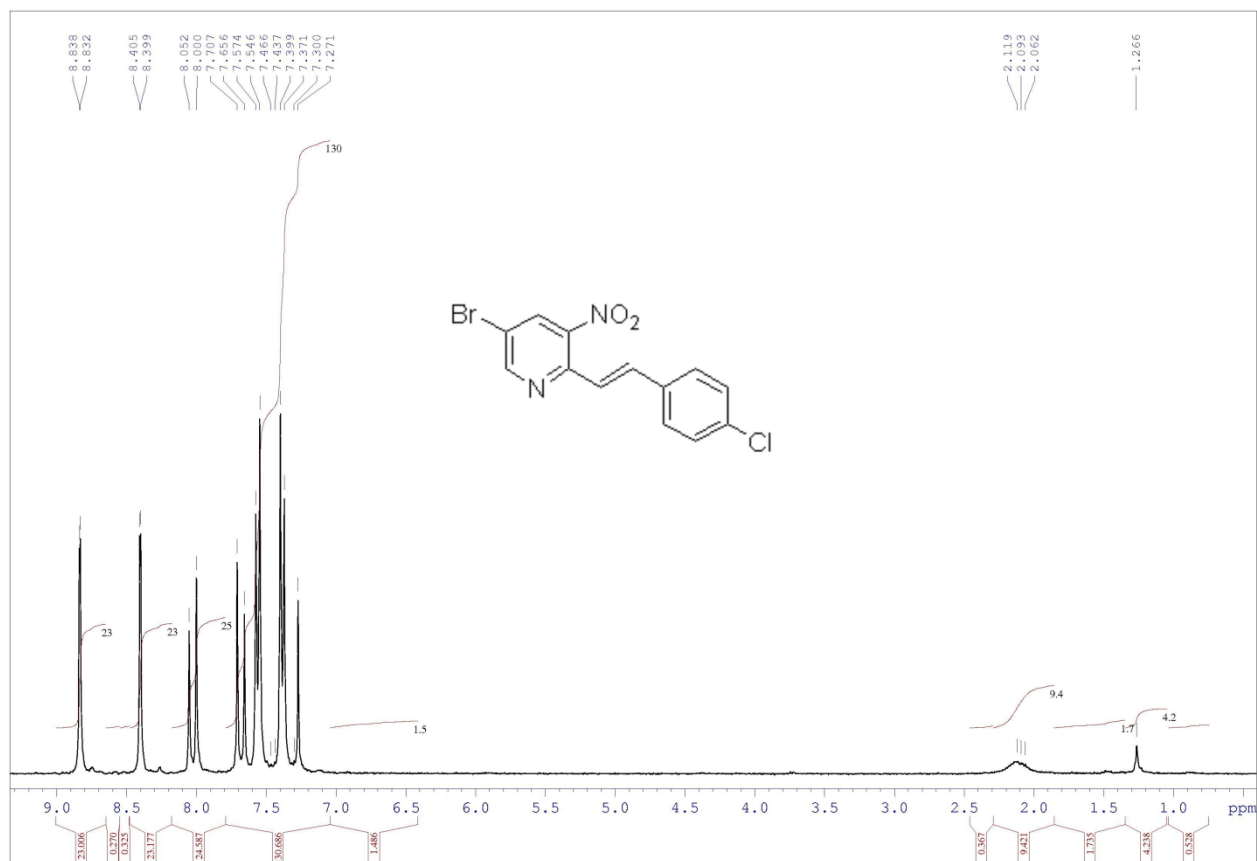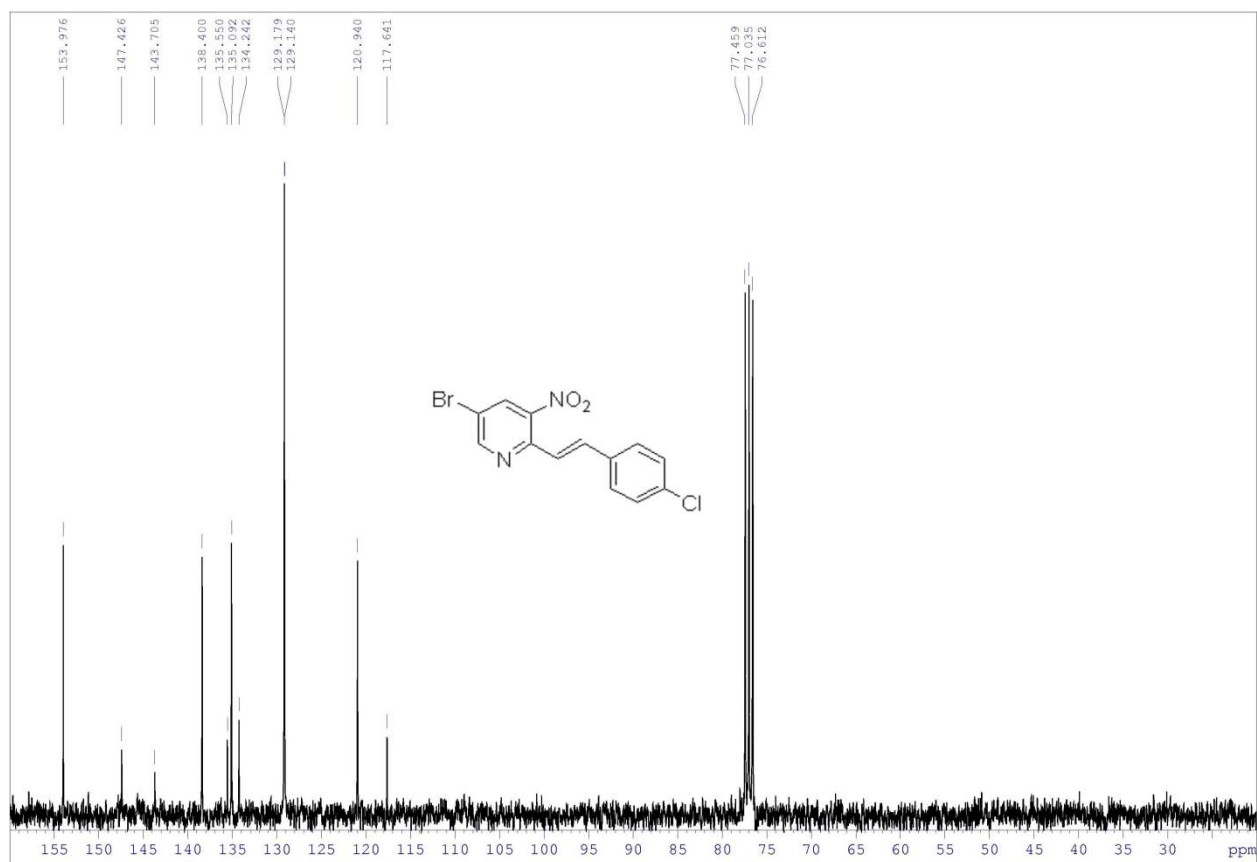

$^1\text{H}$  and  $^{13}\text{C}$  NMR spectra of compound **4k** in  $\text{CDCl}_3$

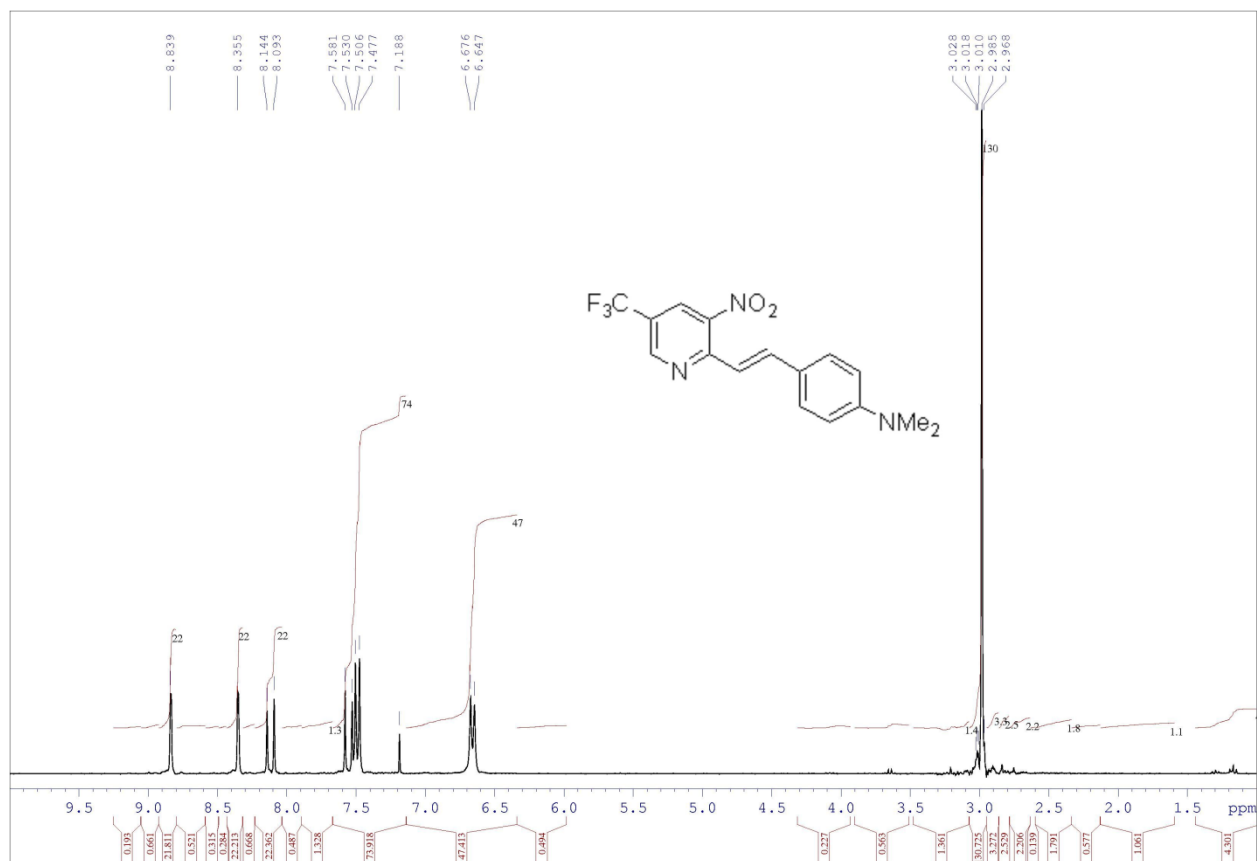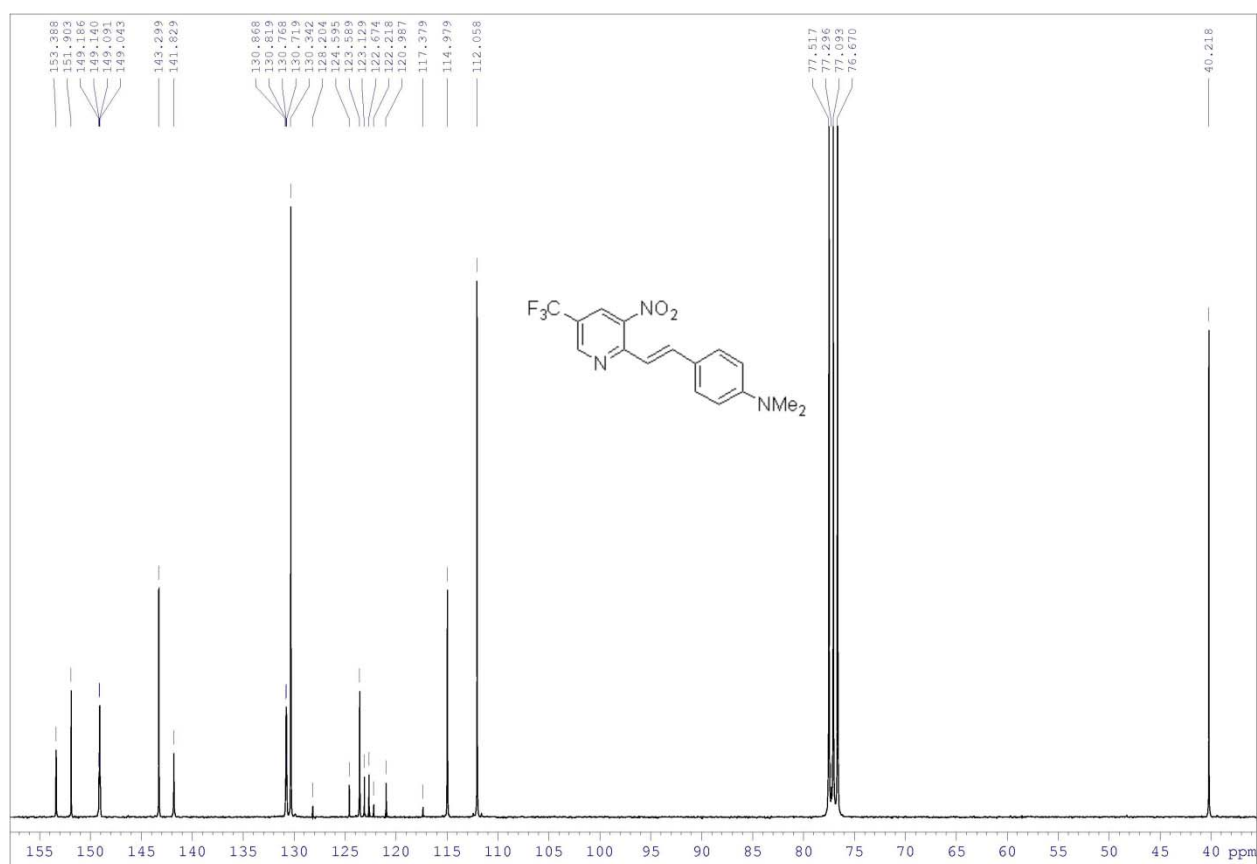

$^1\text{H}$  and  $^{13}\text{C}$  NMR spectra of compound **5a** in  $\text{CDCl}_3$

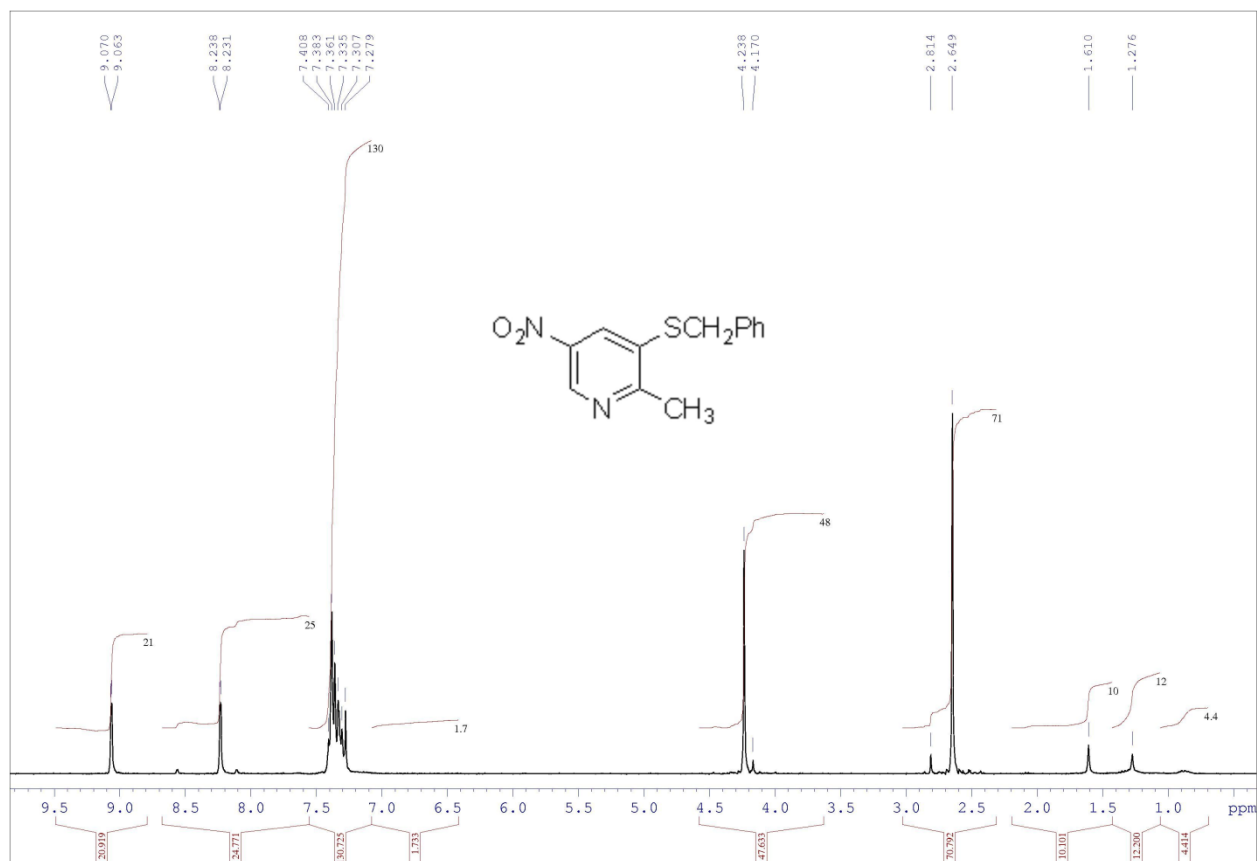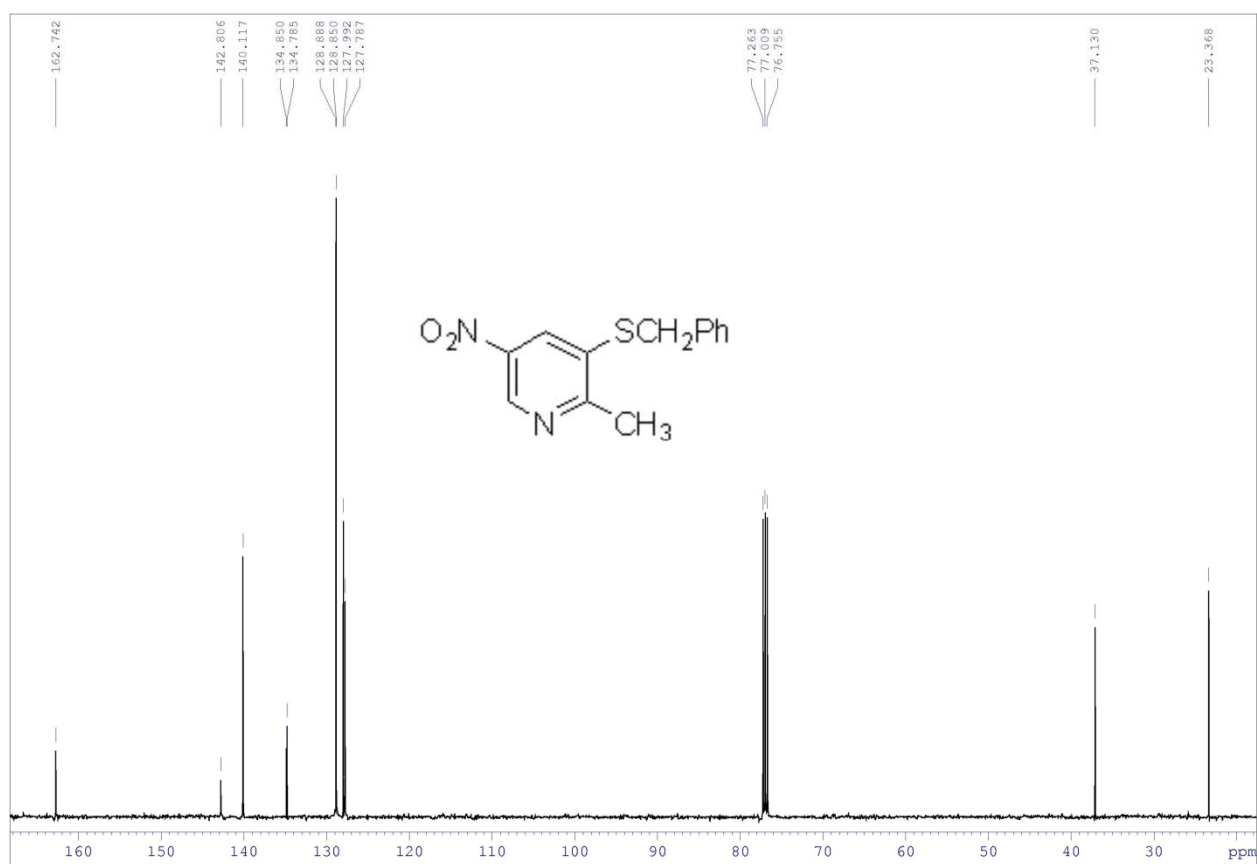

<sup>1</sup>H and <sup>13</sup>C NMR spectra of compound **5b** in CDCl<sub>3</sub>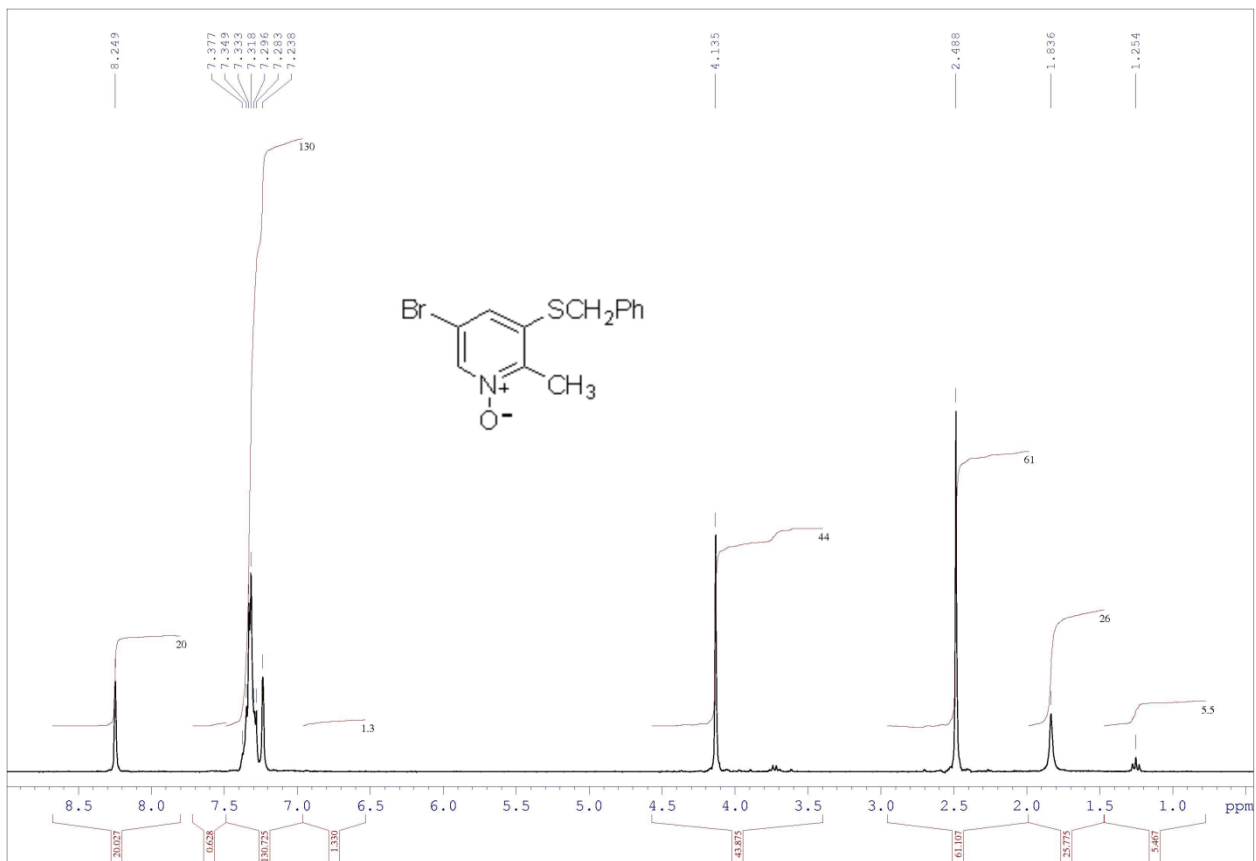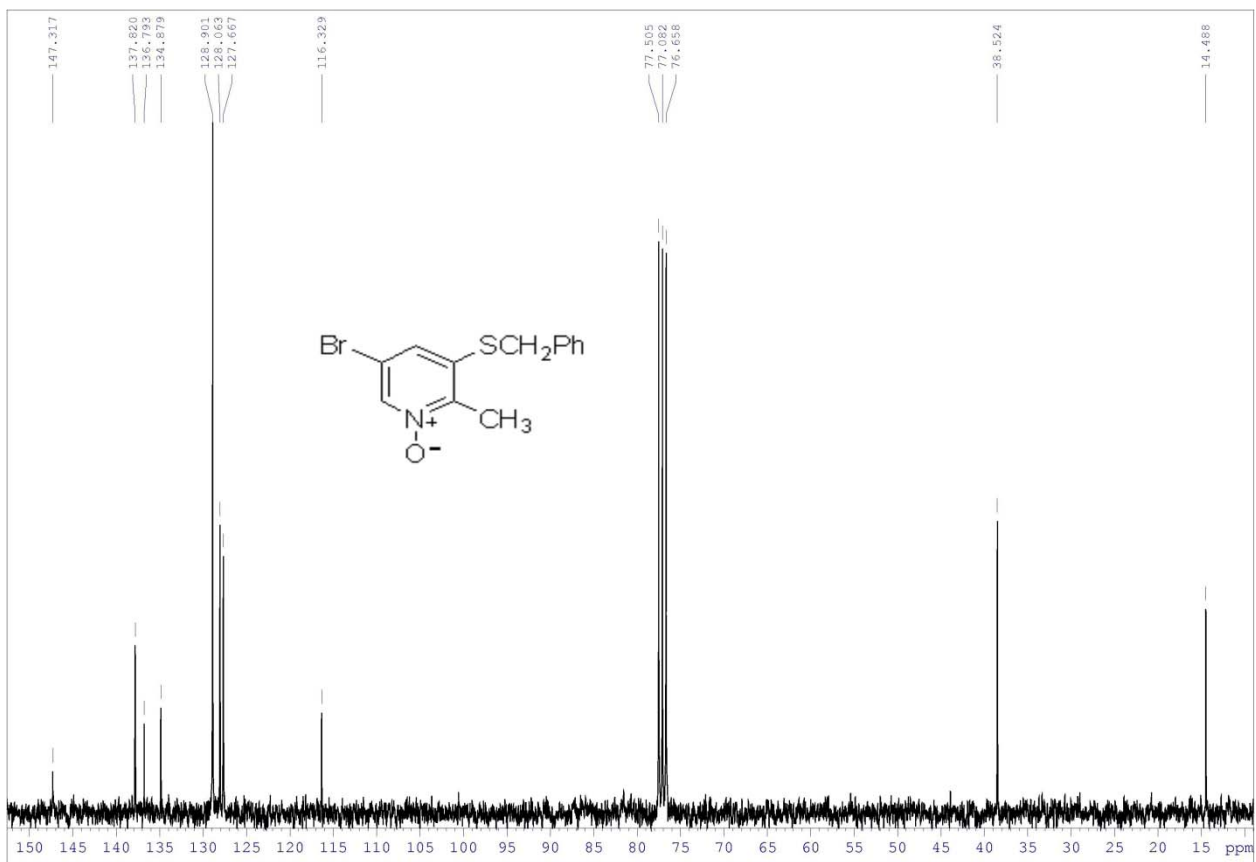

$^1\text{H}$  and  $^{13}\text{C}$  NMR spectra of compound **5c** in  $\text{CDCl}_3$

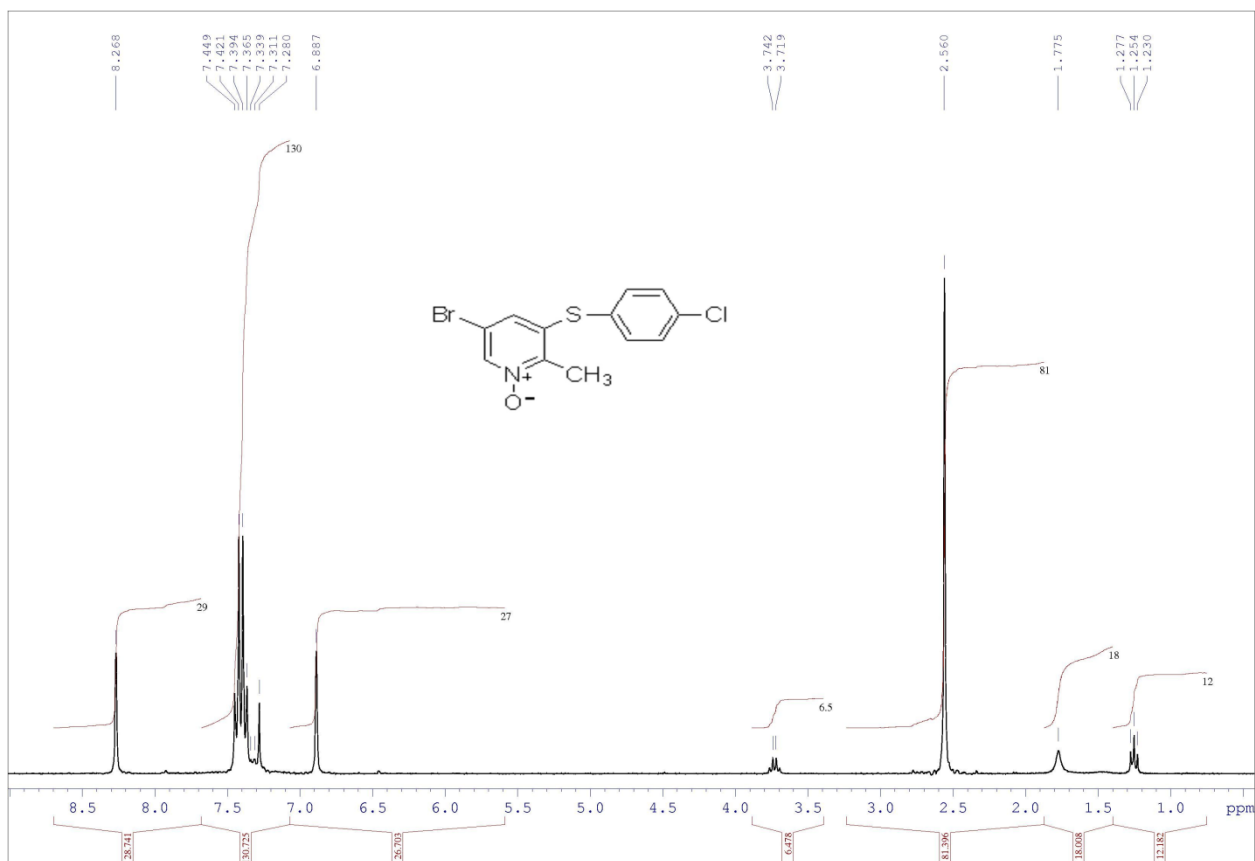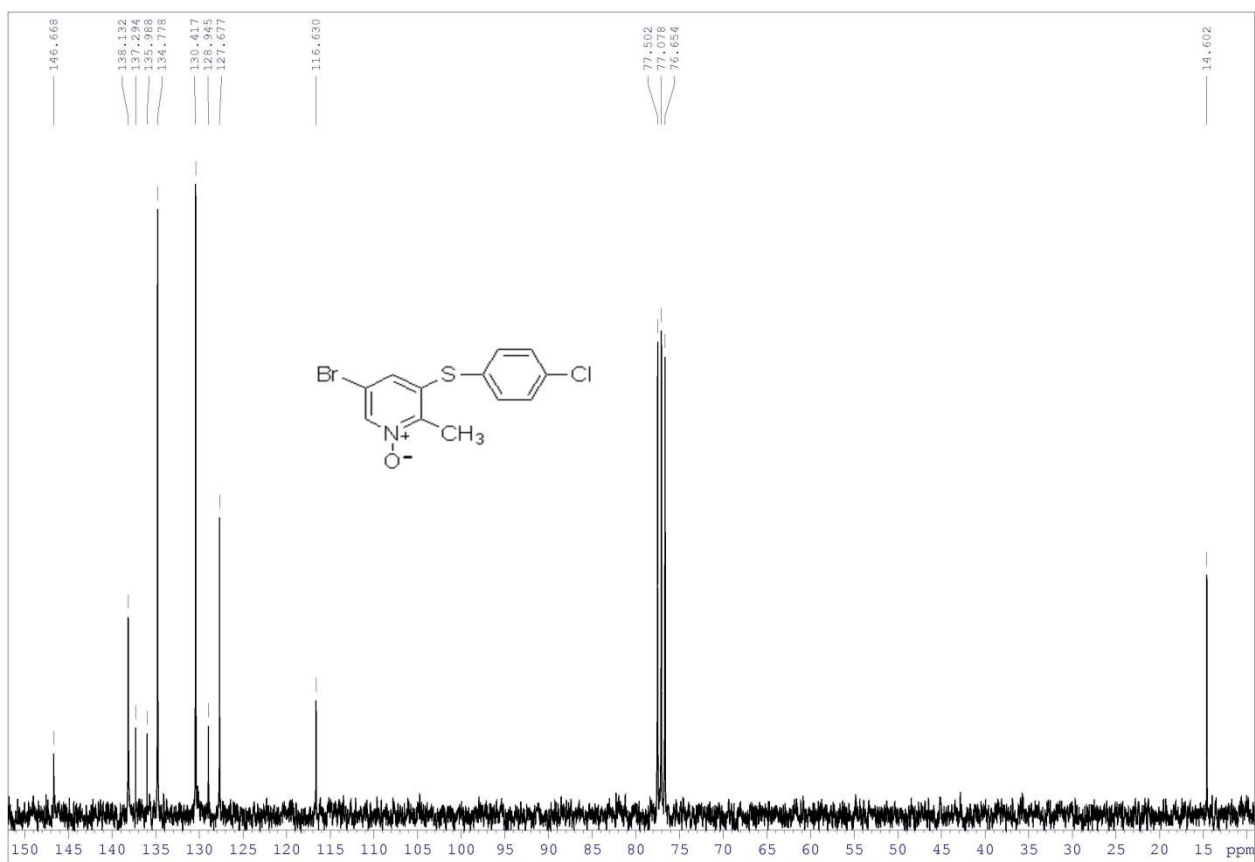

$^1\text{H}$  and  $^{13}\text{C}$  NMR spectra of compound **5d** in  $\text{CDCl}_3$

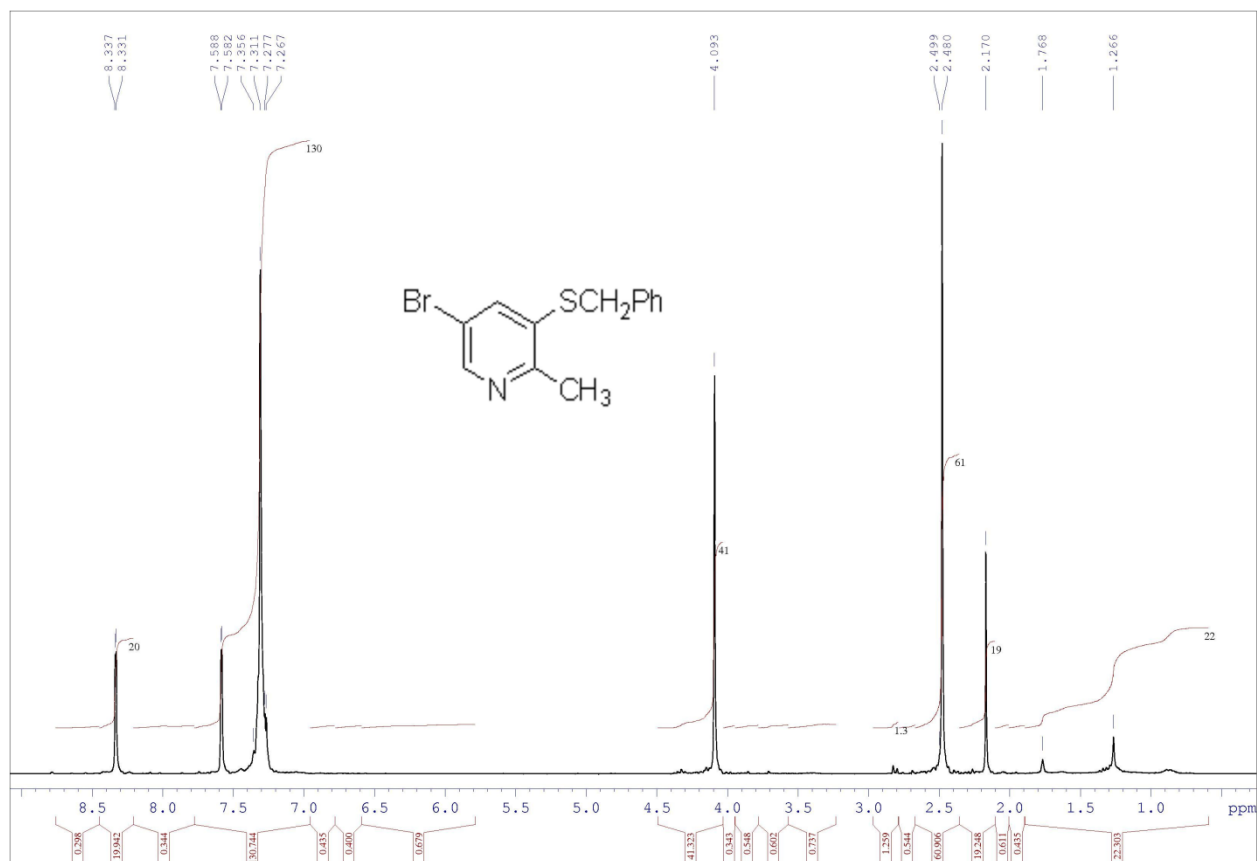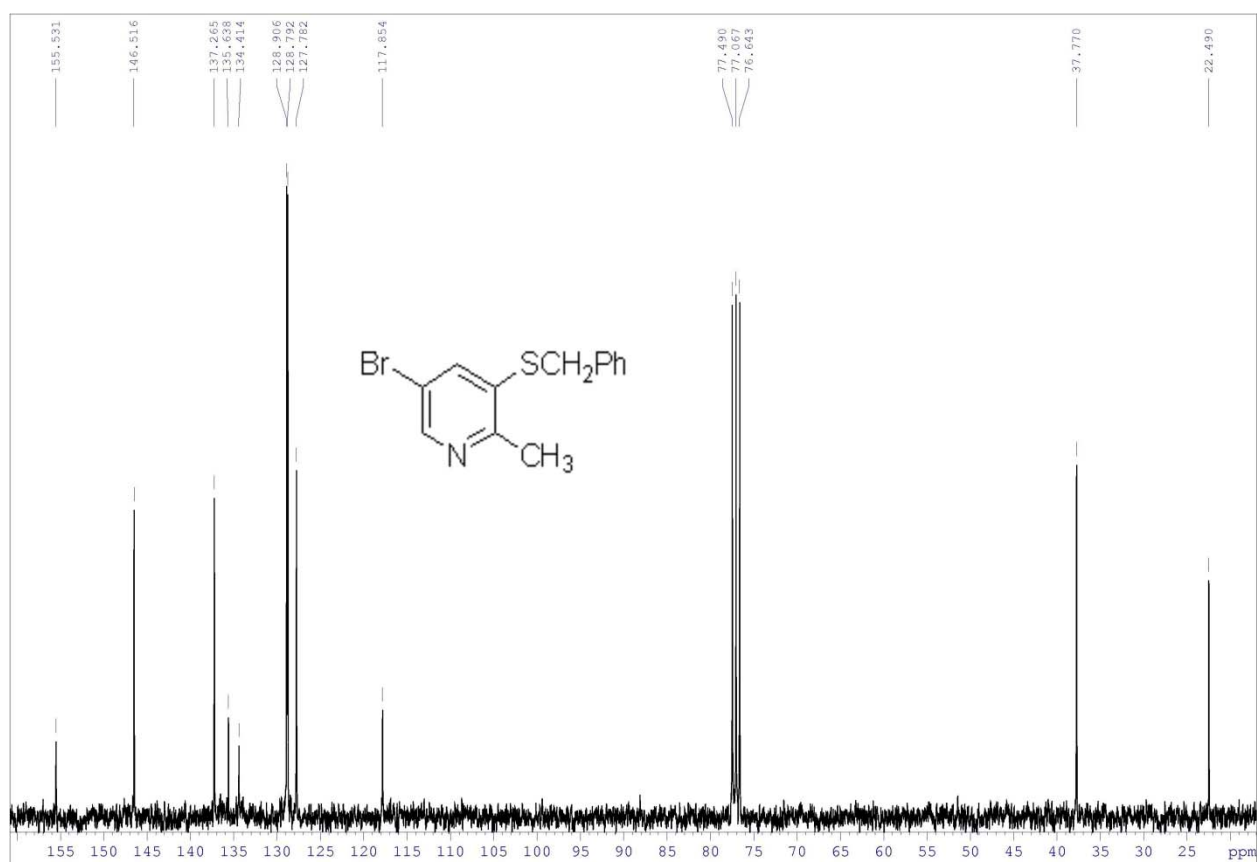

$^1\text{H}$  and  $^{13}\text{C}$  NMR spectra of compound **5e** in  $\text{CDCl}_3$

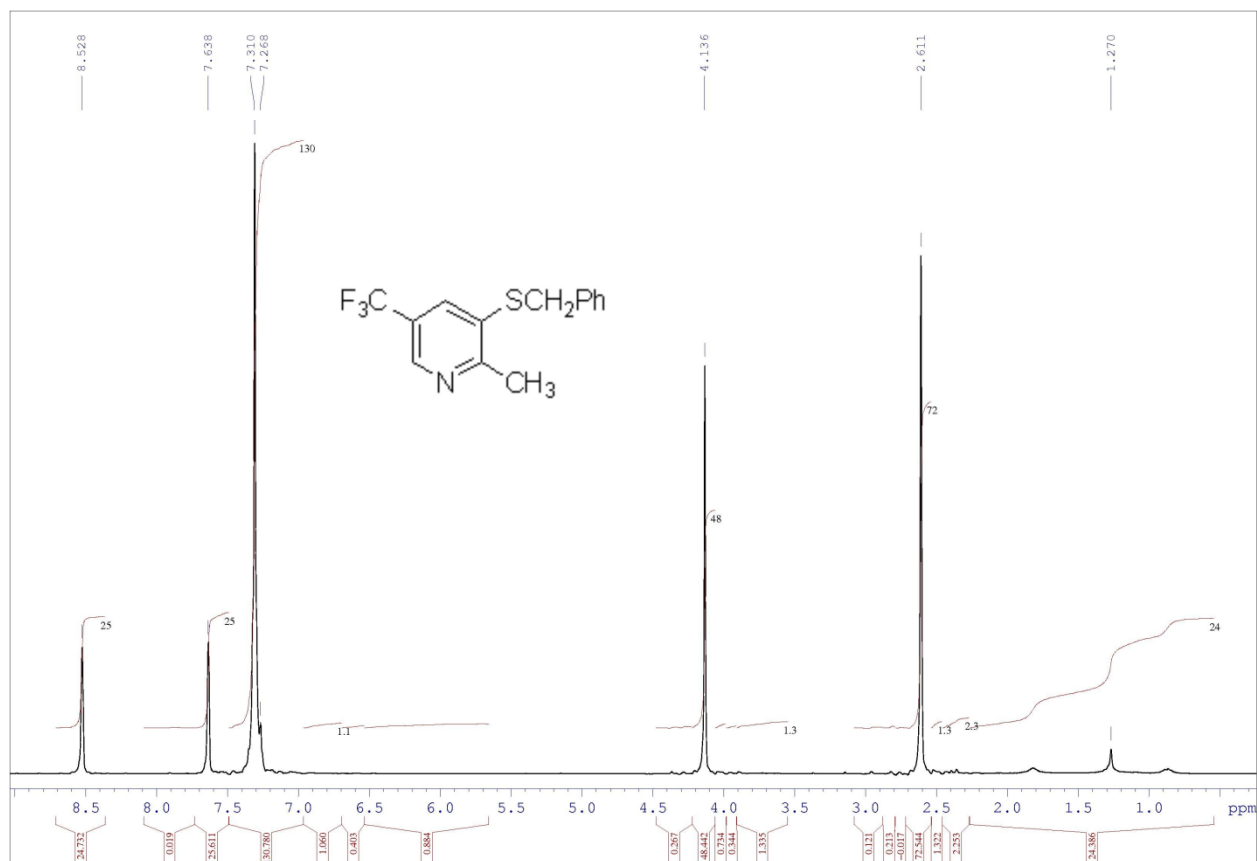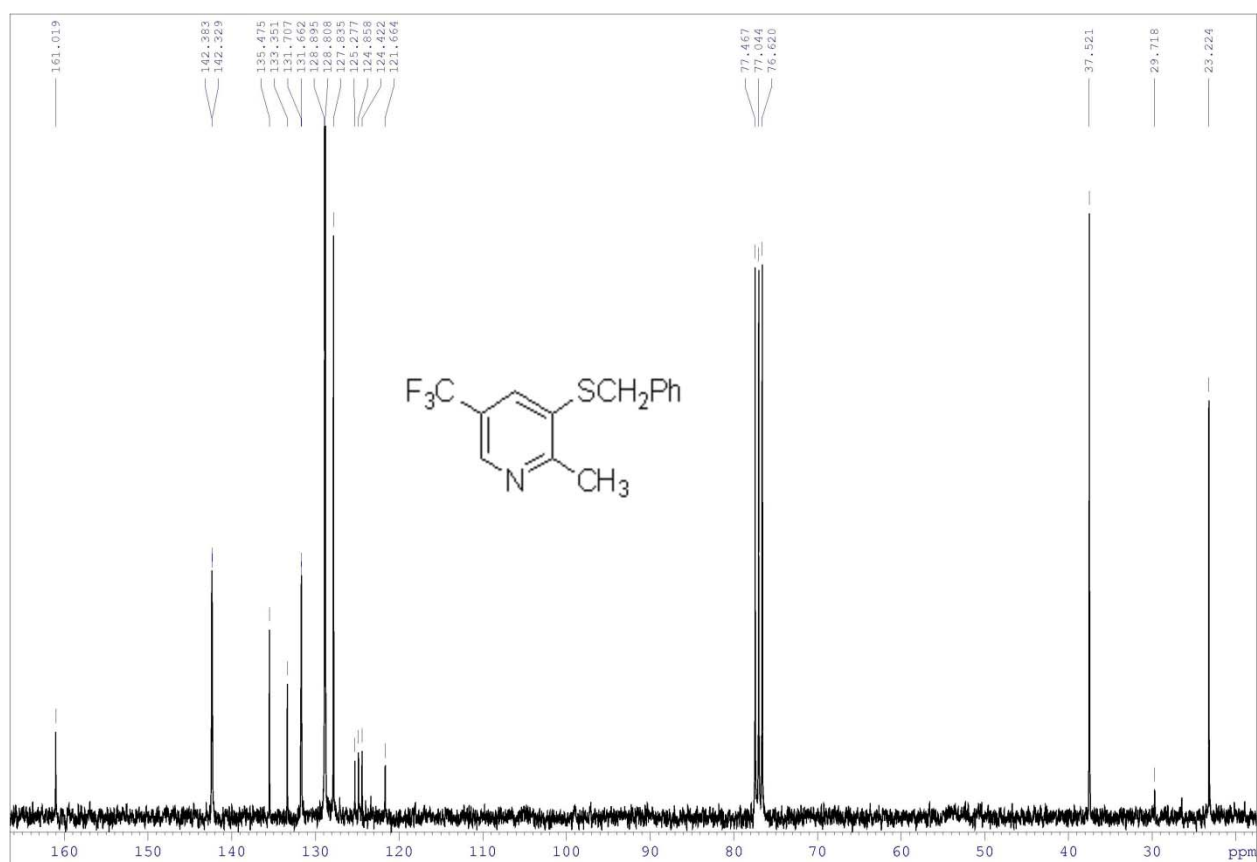

$^1\text{H}$  and  $^{13}\text{C}$  NMR spectra of compound **5f** in  $\text{CDCl}_3$

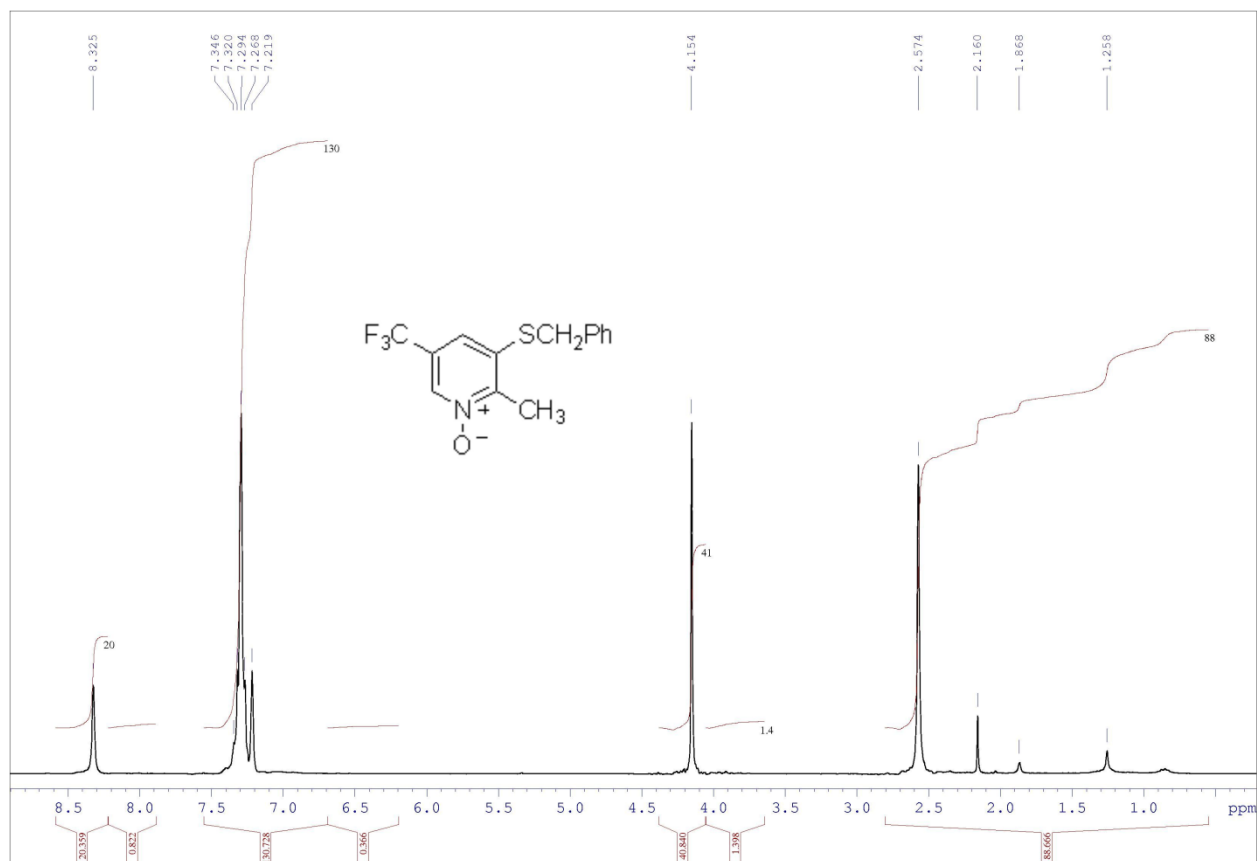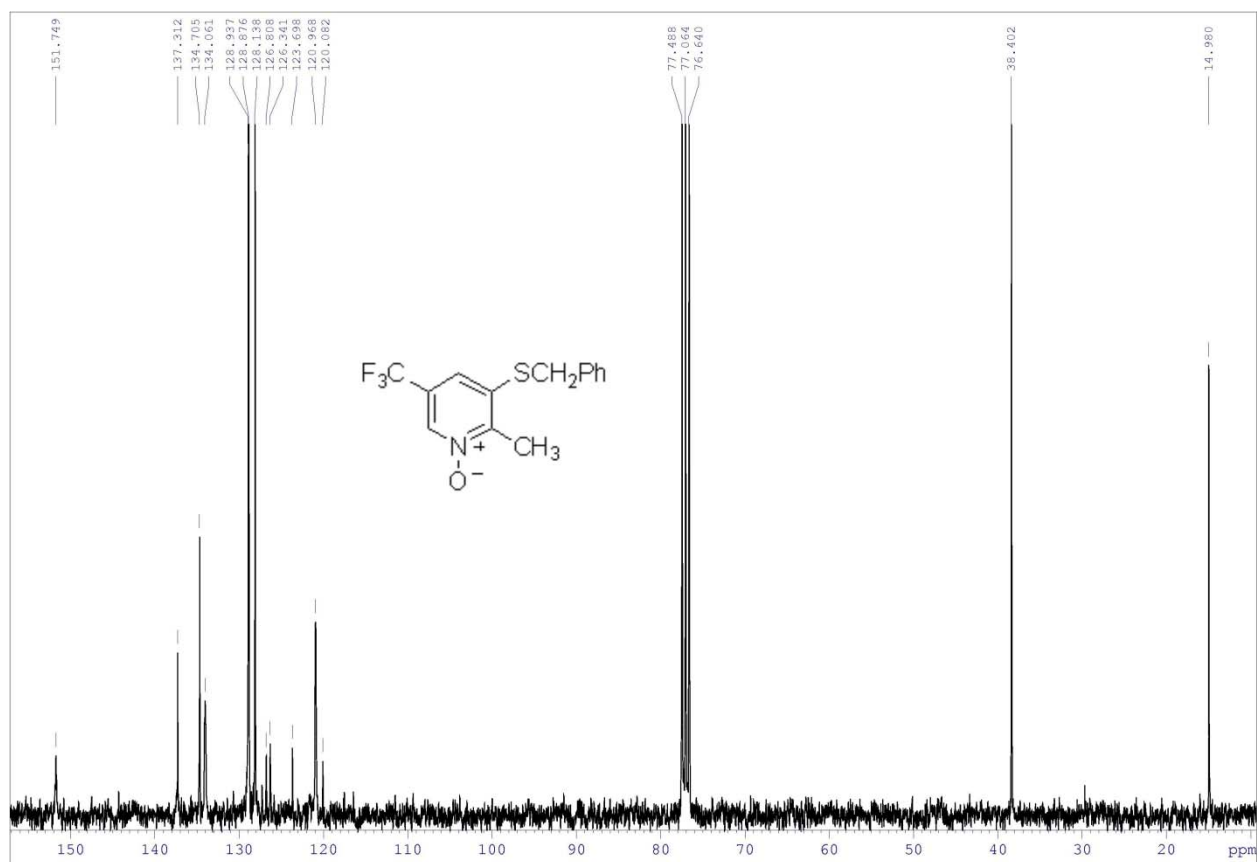



$^1\text{H}$  and  $^{13}\text{C}$  NMR spectra of compound **5g** in  $\text{CDCl}_3$

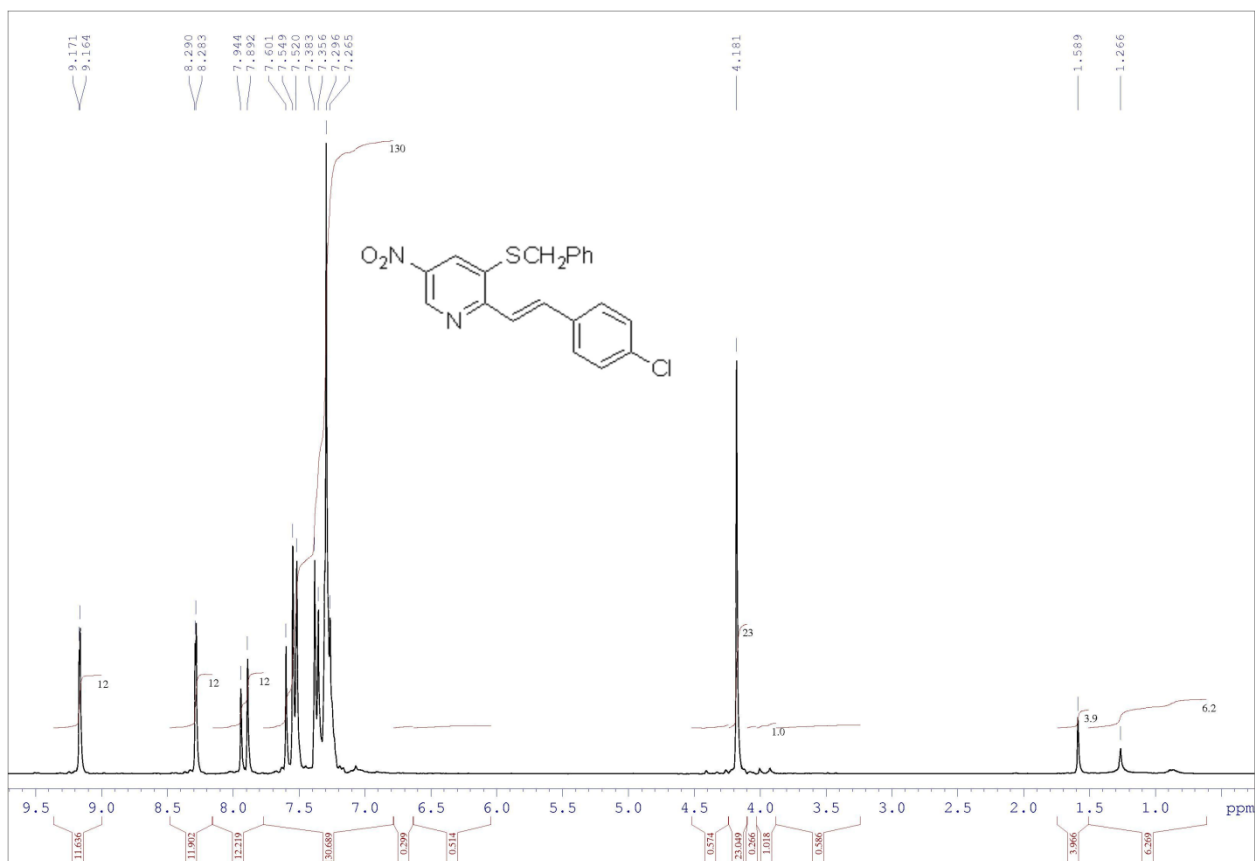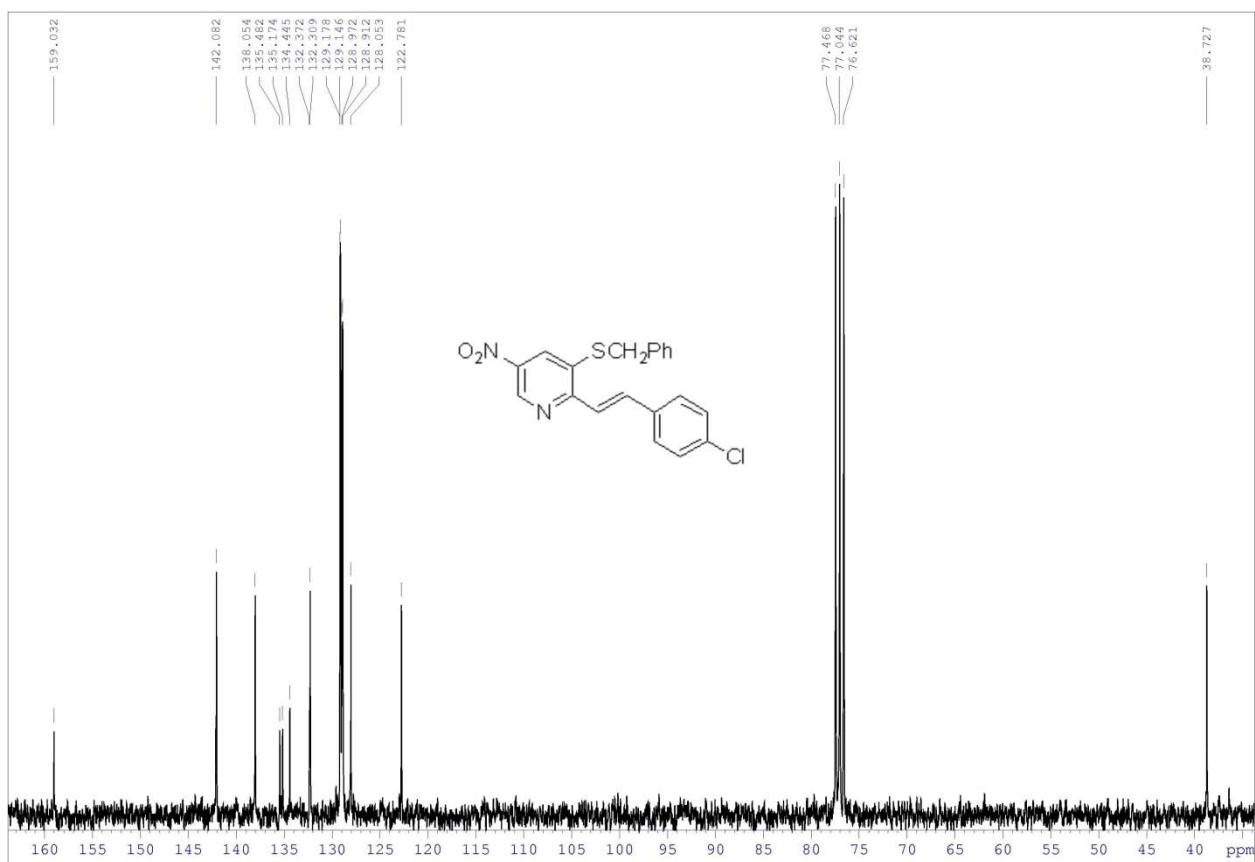

$^1\text{H}$  and  $^{13}\text{C}$  NMR spectra of compound **5h** in  $\text{CDCl}_3$

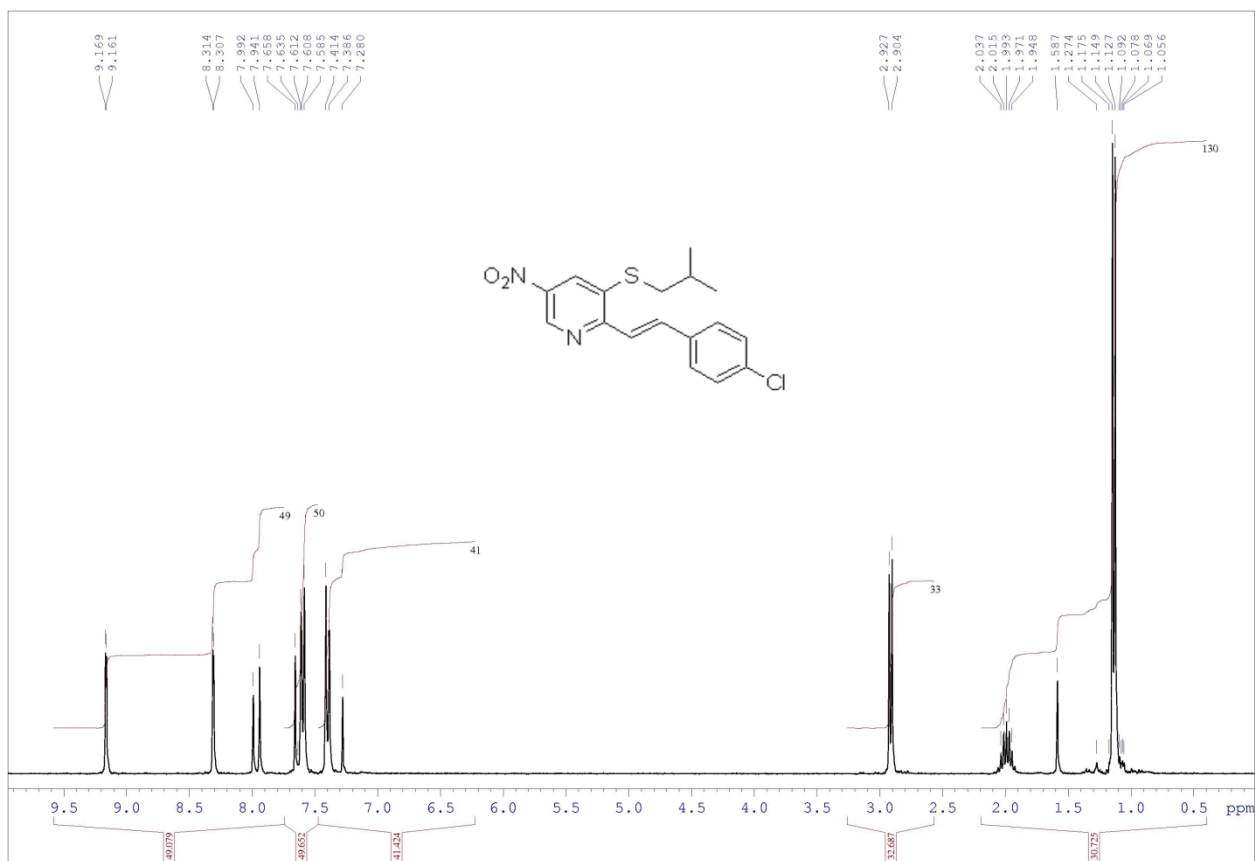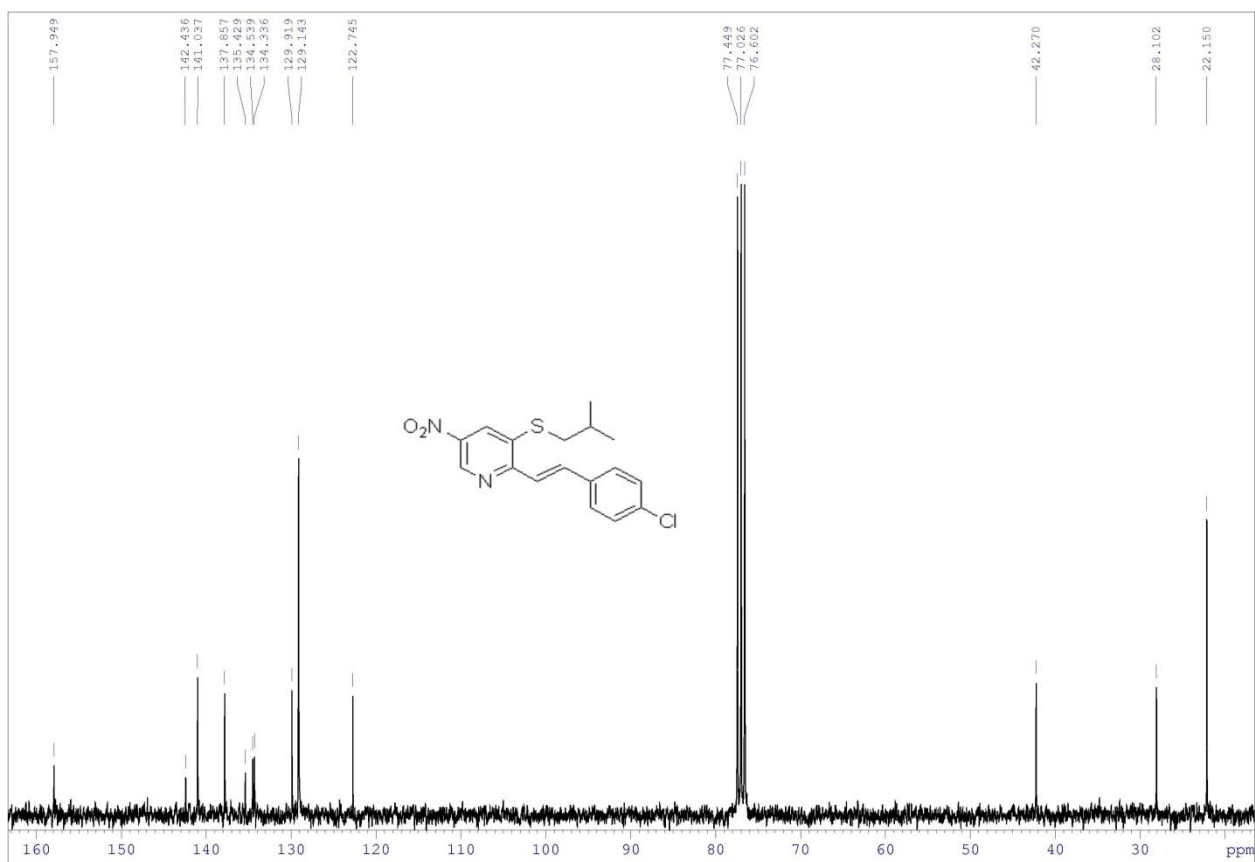

$^1\text{H}$  NMR spectrum of compound **5i** in  $\text{CDCl}_3$

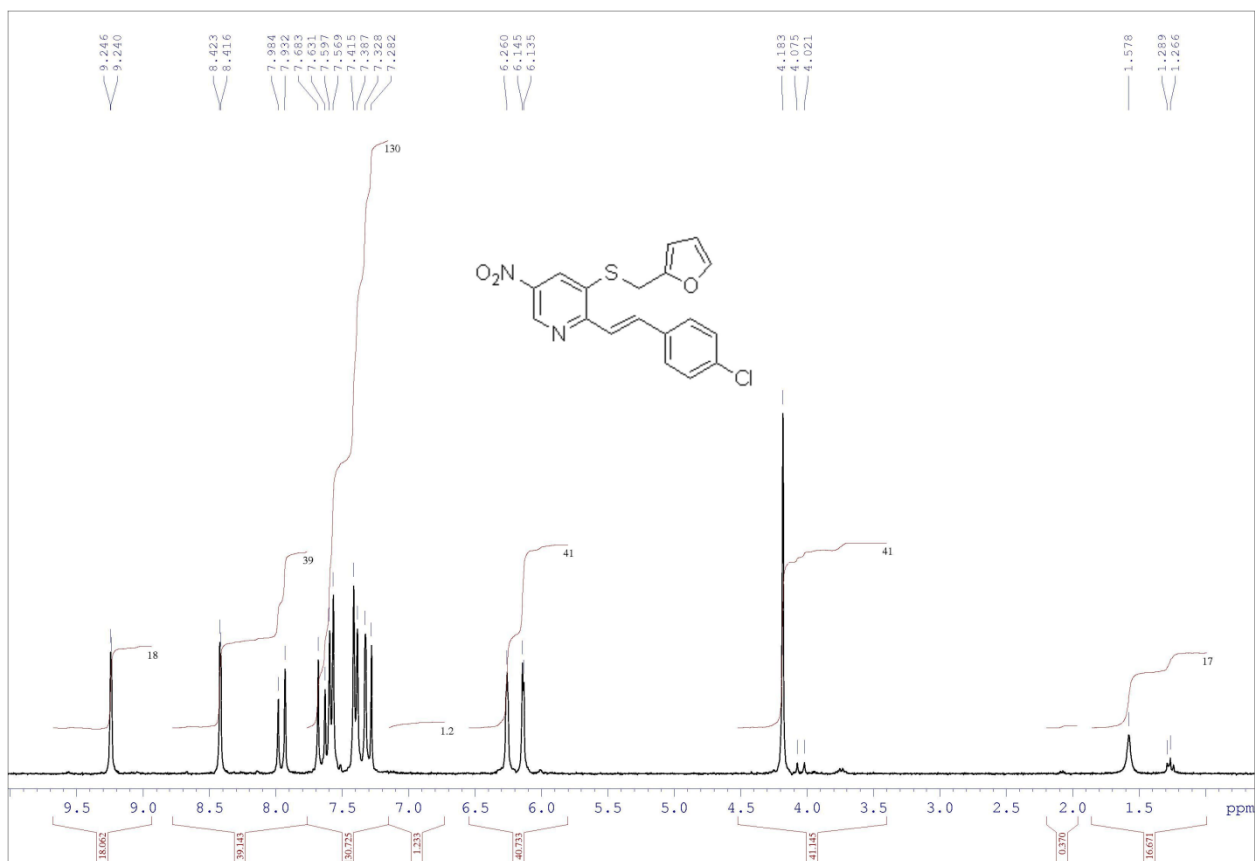

$^1\text{H}$  NMR spectrum of compound **5j** in  $\text{CDCl}_3$

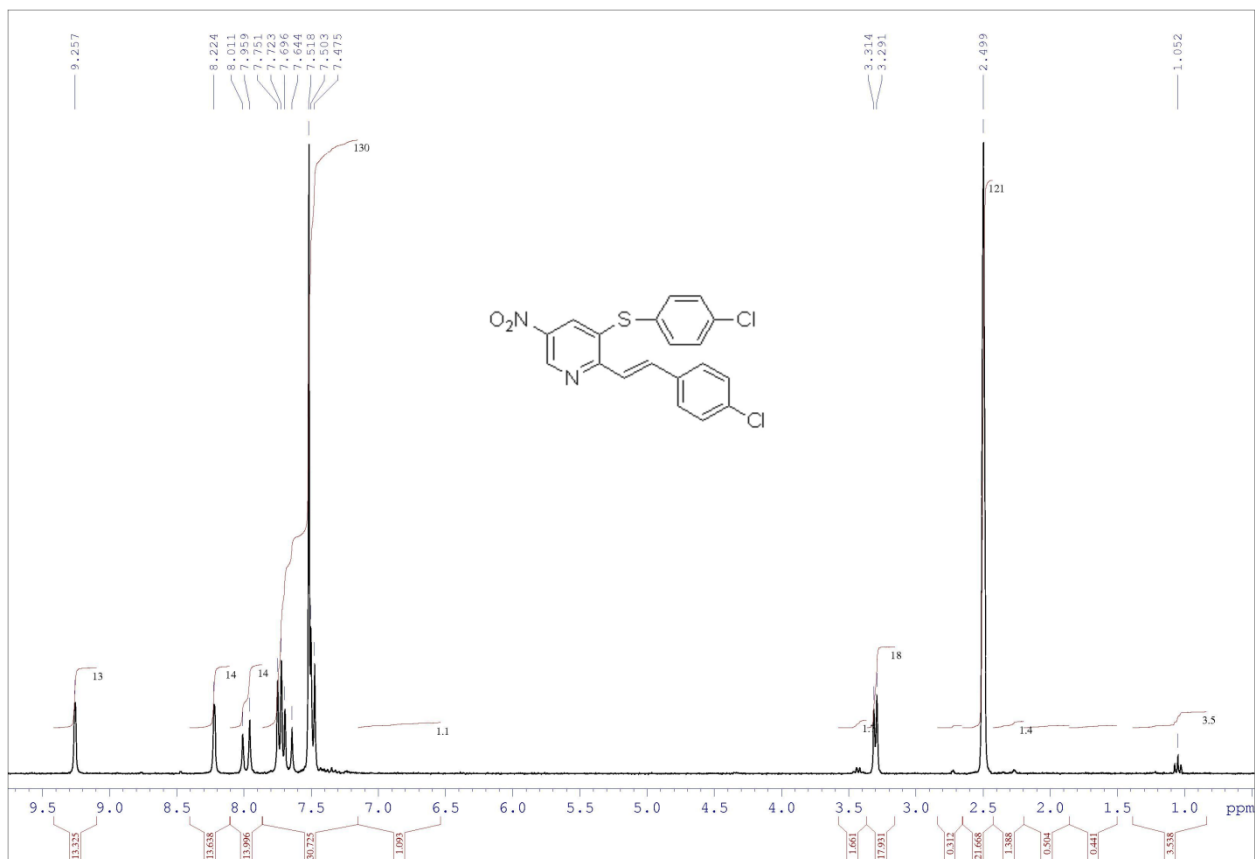

$^1\text{H}$  NMR spectrum of compound **5k** in  $\text{DMSO-d}_6$

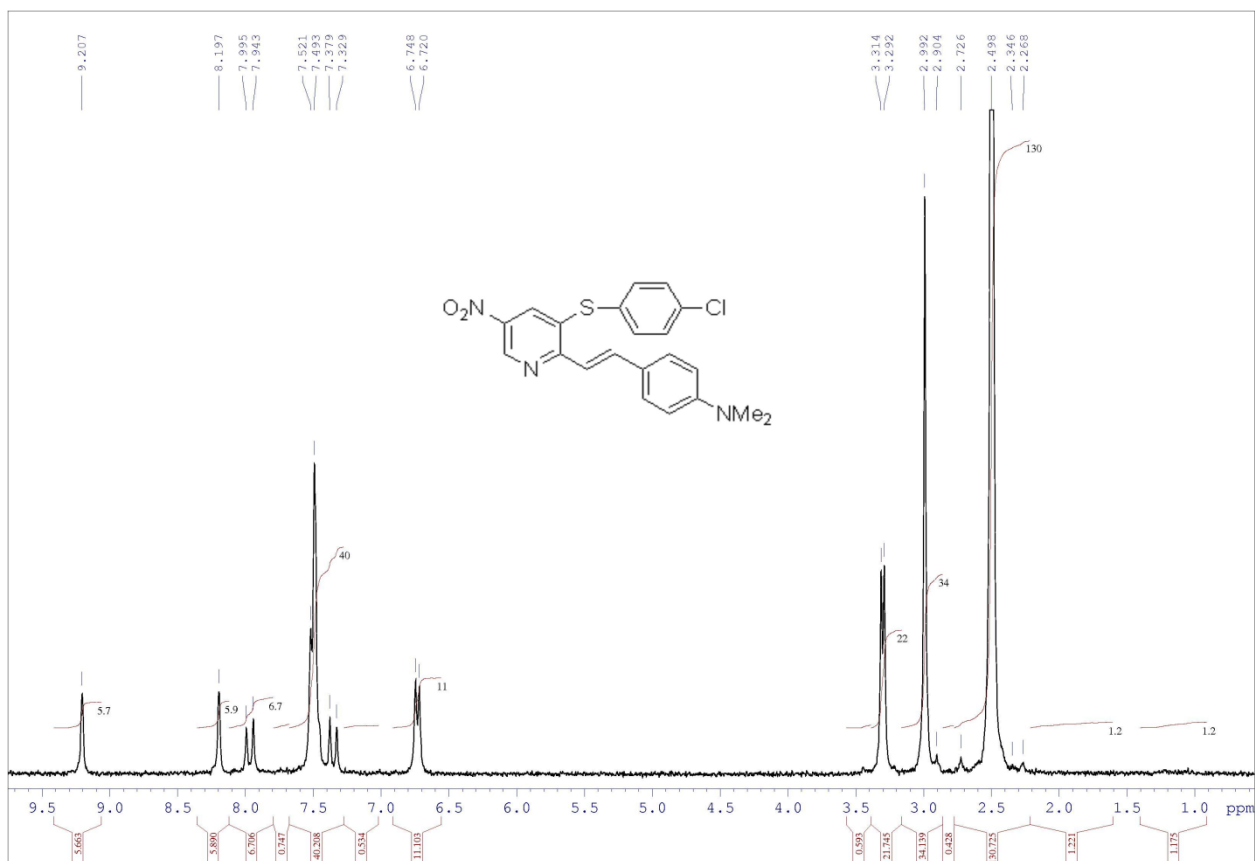

$^{13}\text{C}$  NMR spectrum of compound **5k** in  $\text{CDCl}_3$

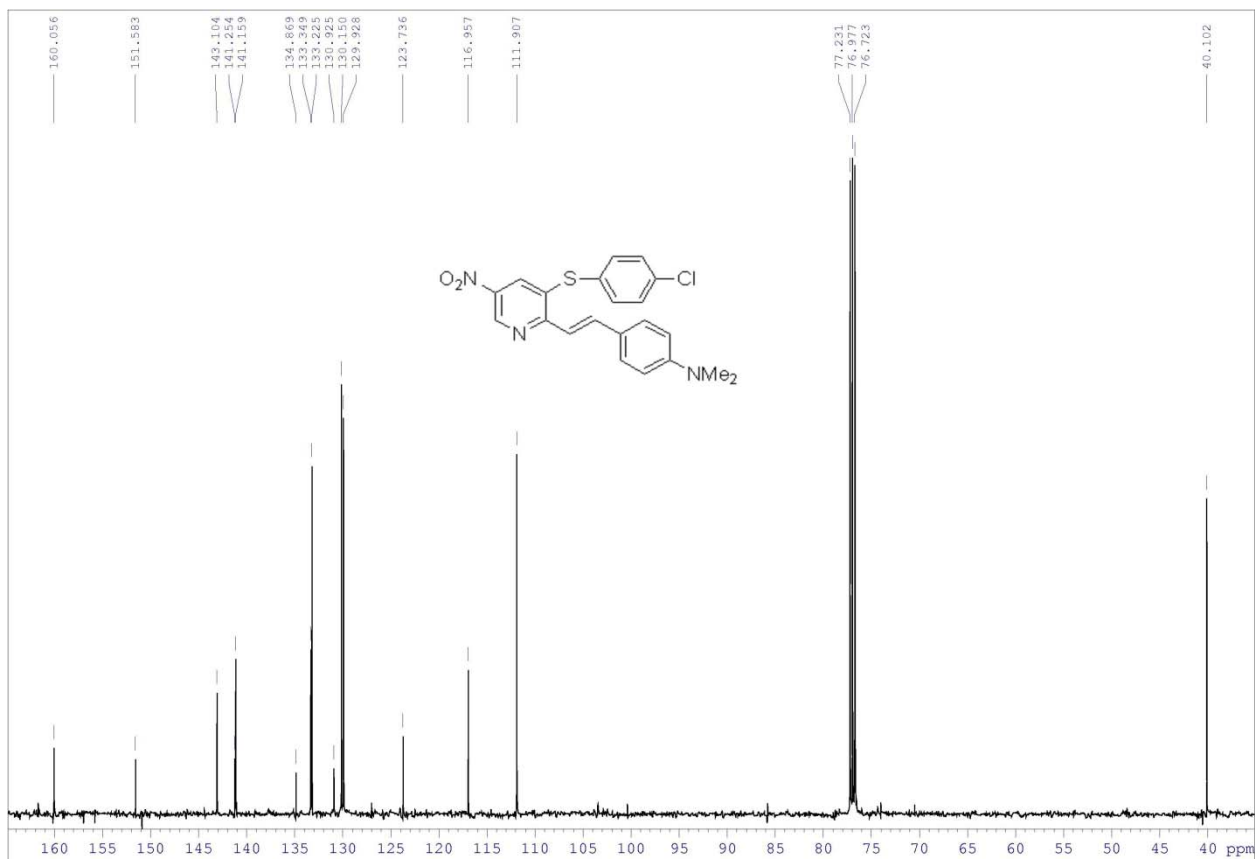

$^1\text{H}$  and  $^{13}\text{C}$  NMR spectra of compound **5I** in  $\text{CDCl}_3$

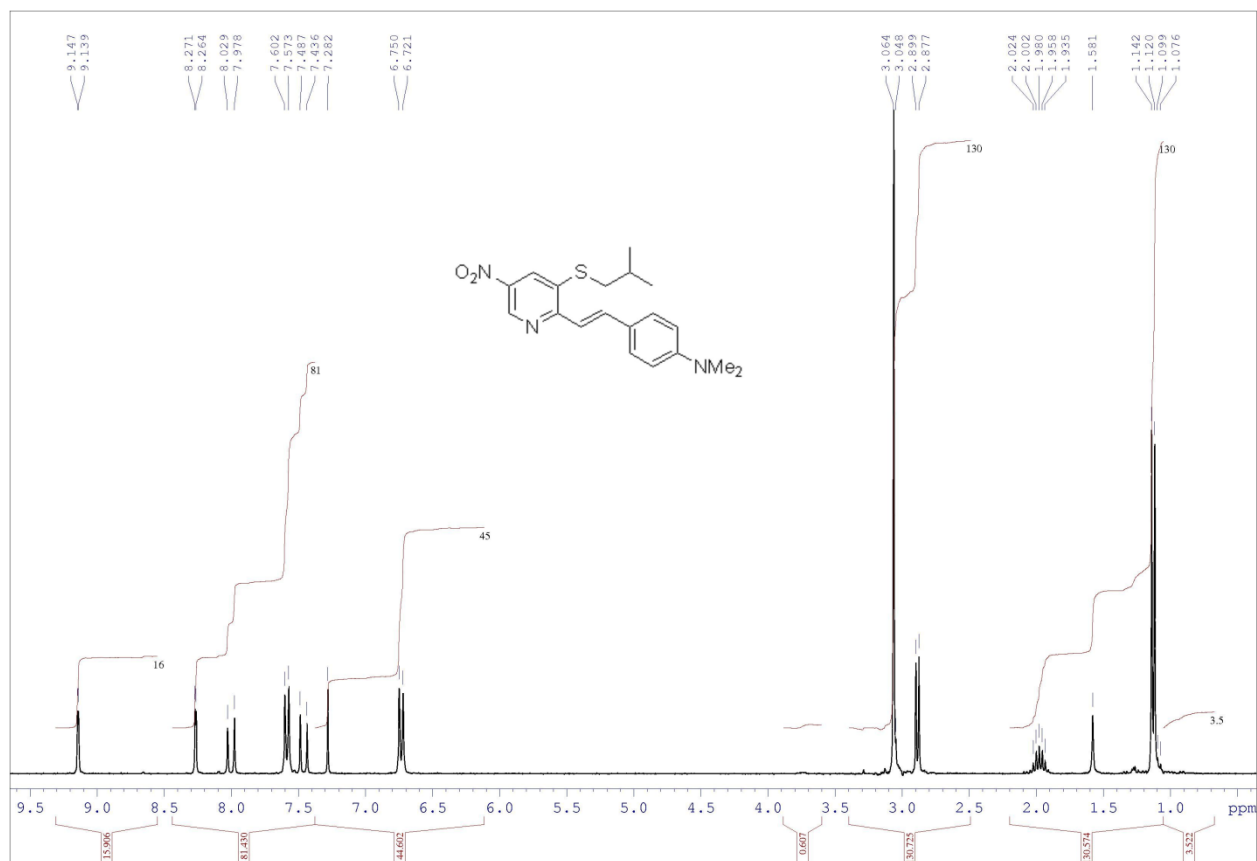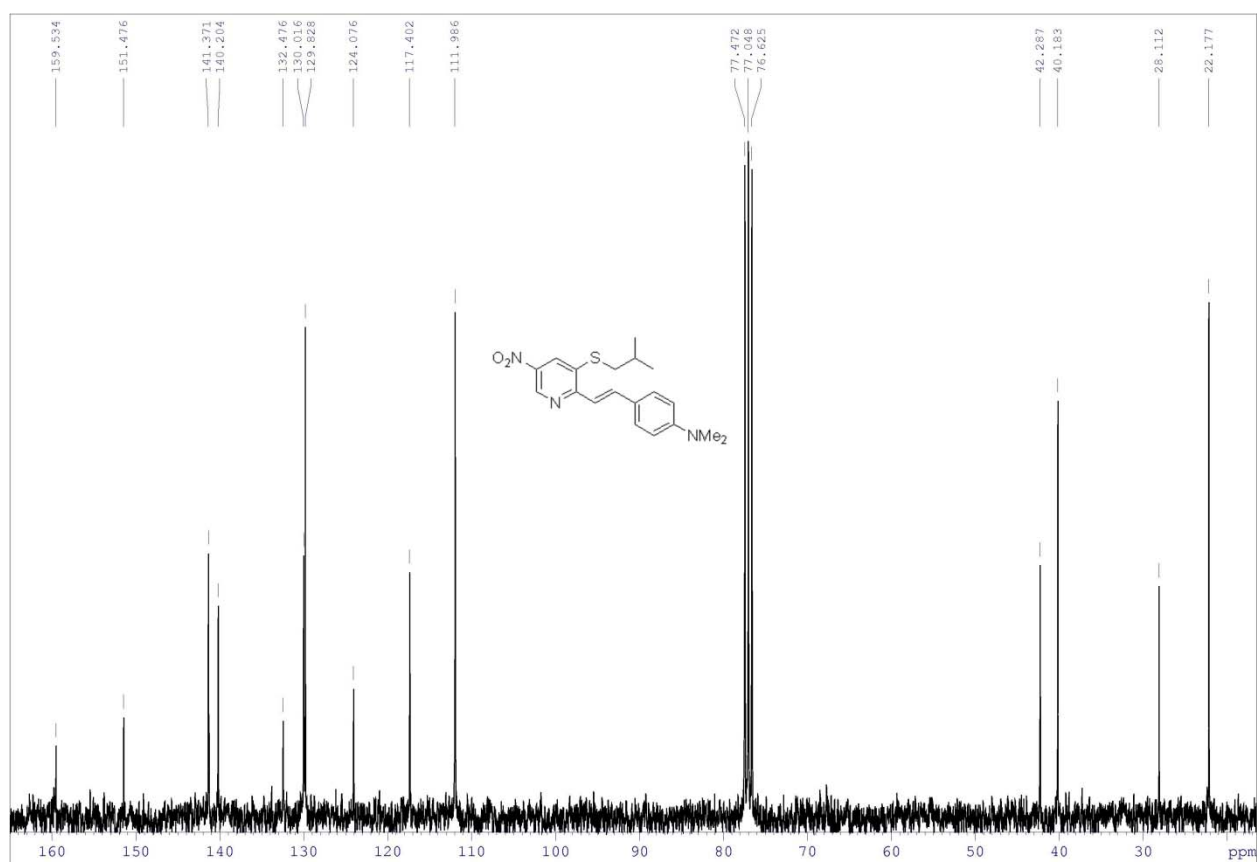

$^1\text{H}$  and  $^{13}\text{C}$  NMR spectra of compound **5m** in  $\text{CDCl}_3$

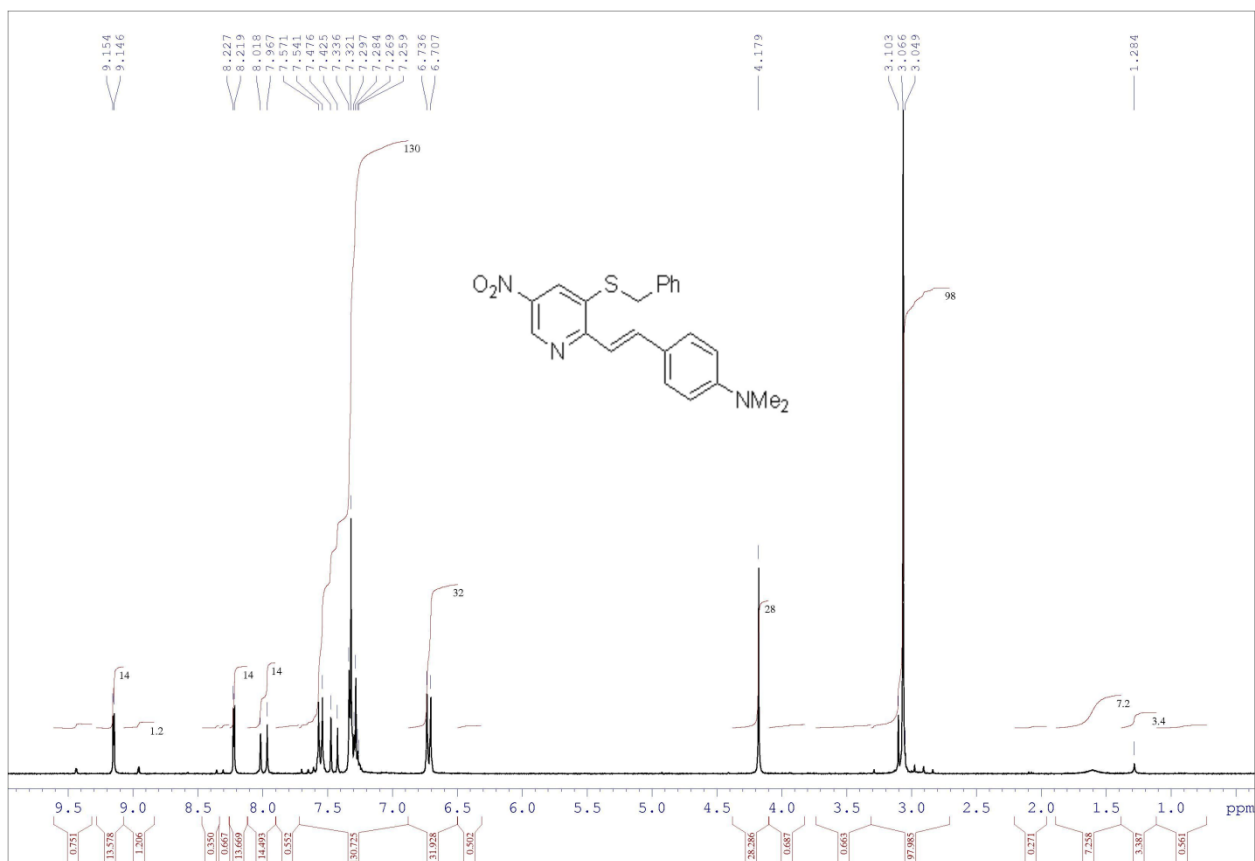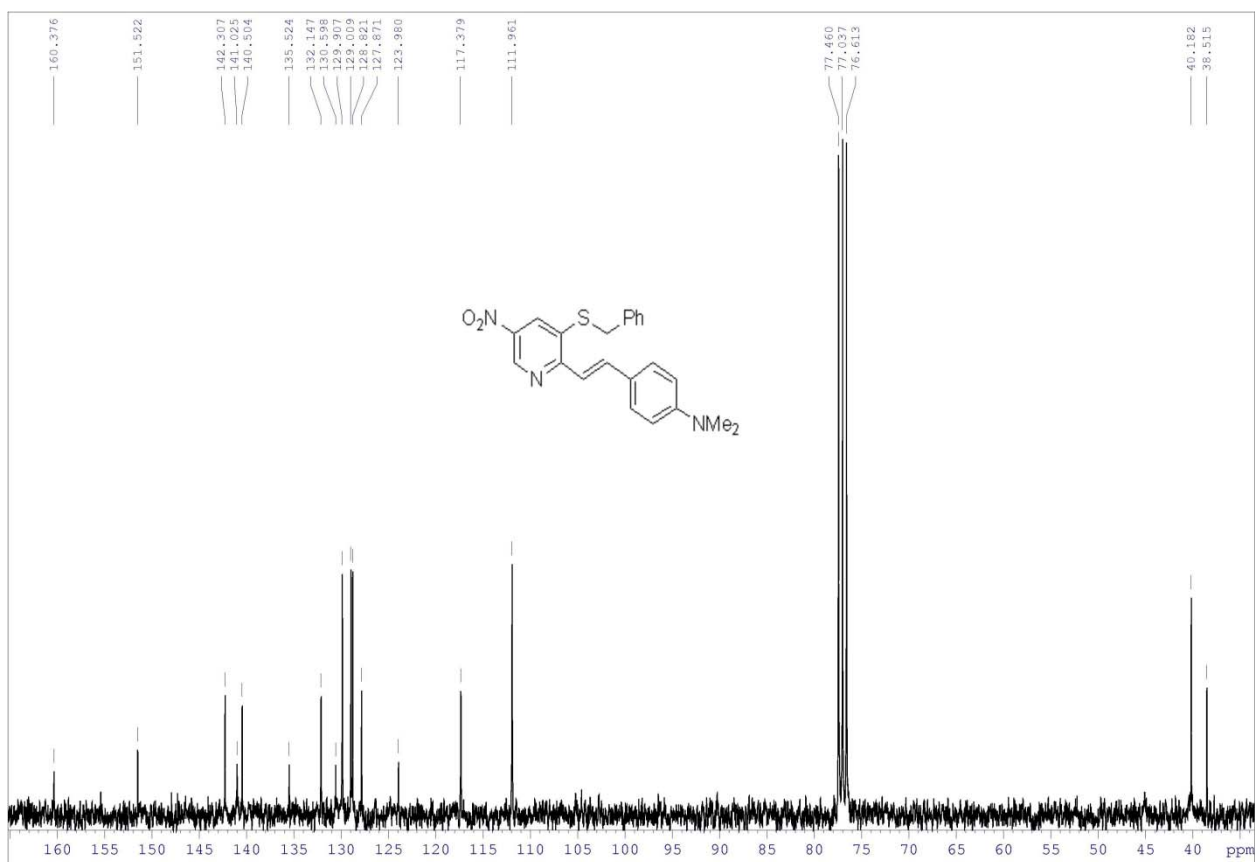

$^1\text{H}$  and  $^{13}\text{C}$  NMR spectra of compound **5n** in  $\text{CDCl}_3$

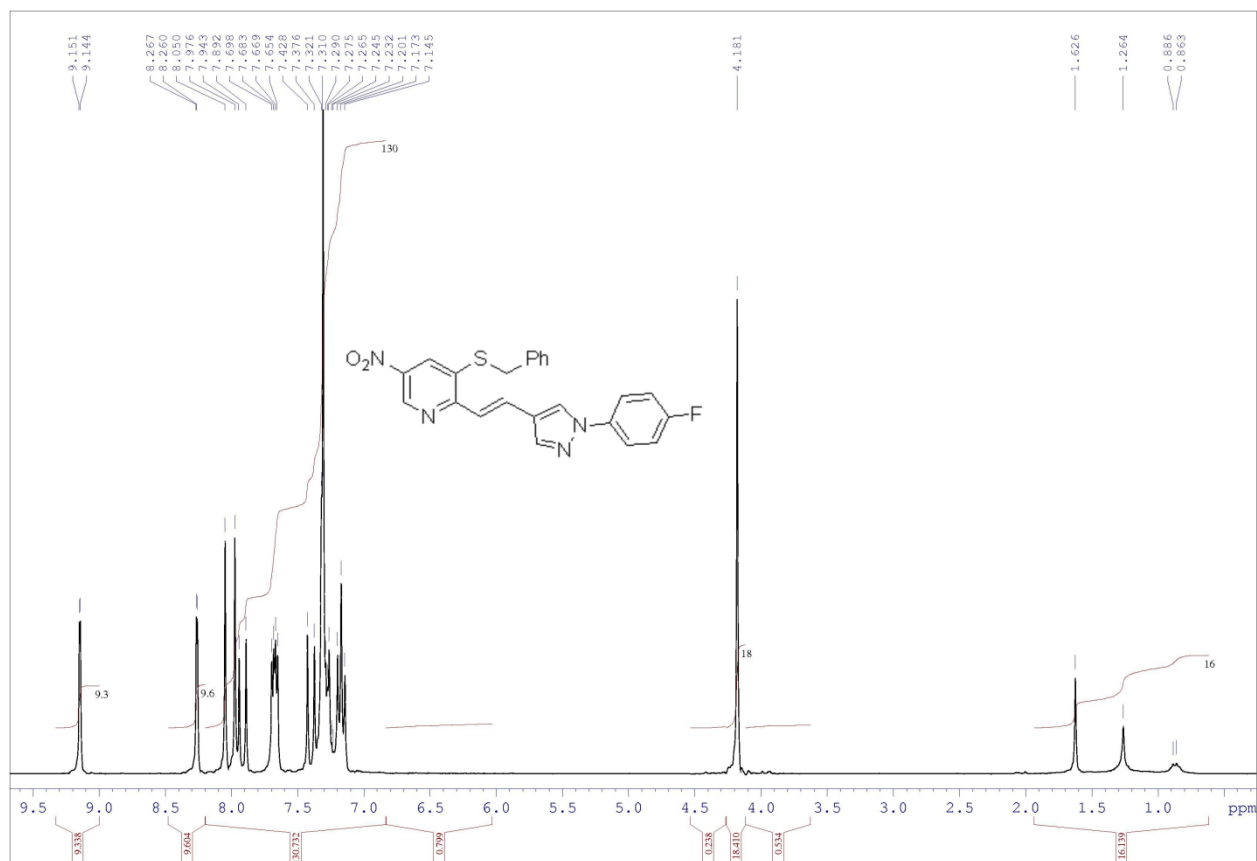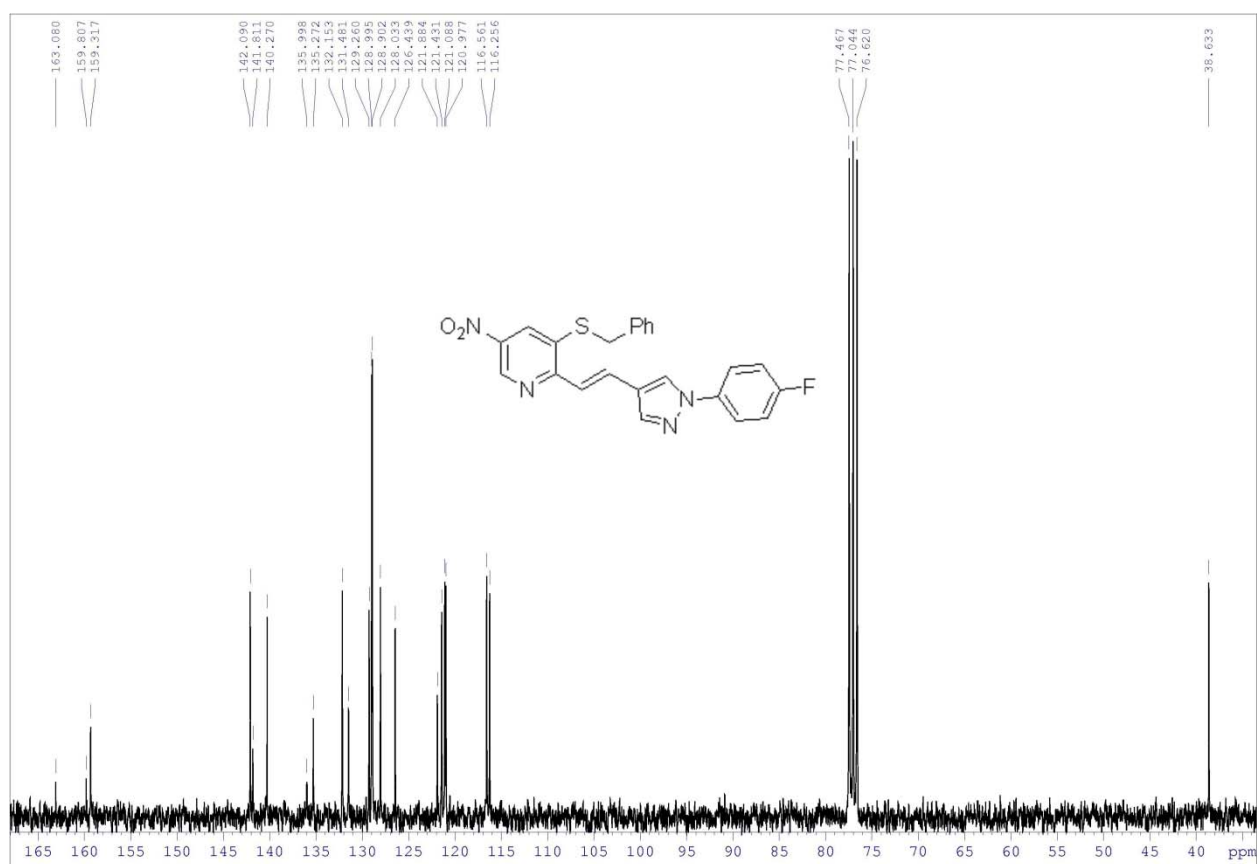

$^1\text{H}$  NMR spectrum of compound **5o** in  $\text{DMSO-d}_6$

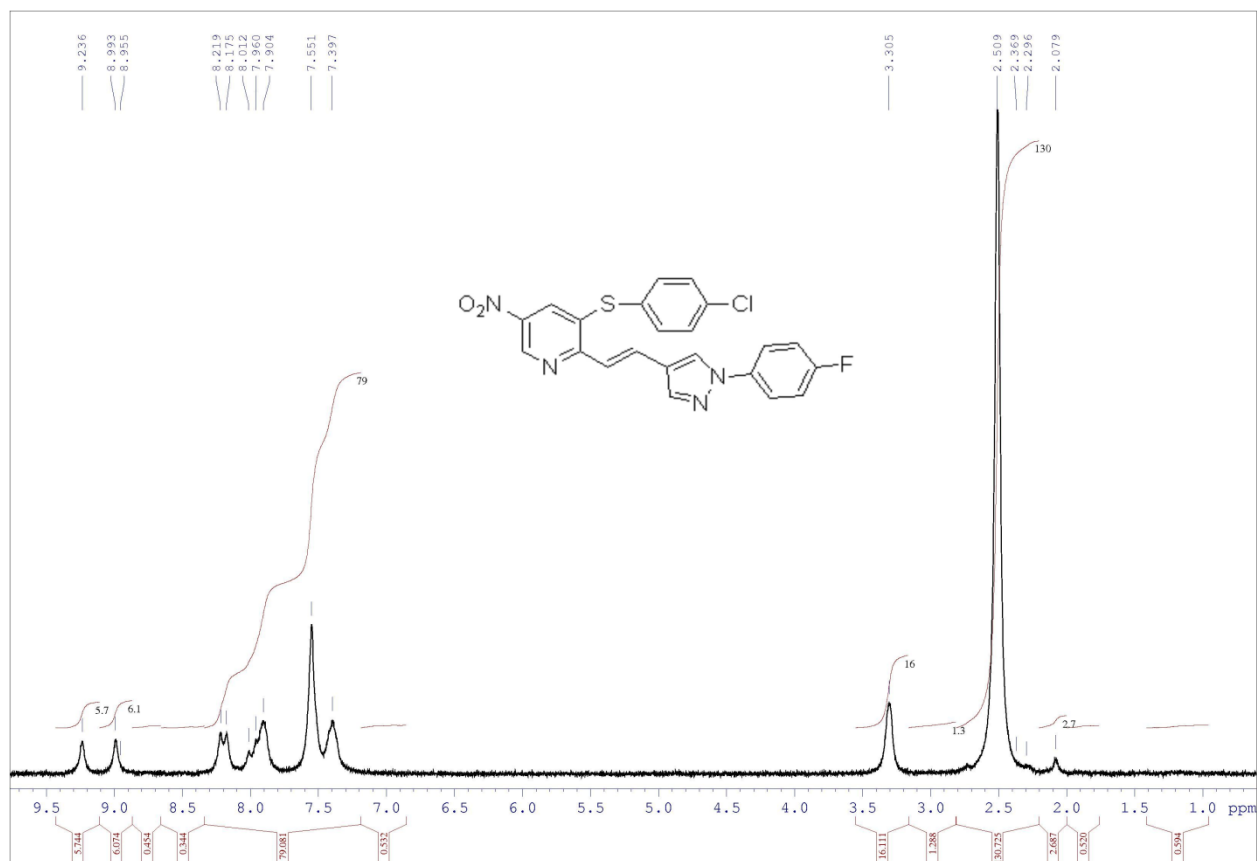



$^1\text{H}$  and  $^{13}\text{C}$  NMR spectra of compound **5p** in  $\text{CDCl}_3$

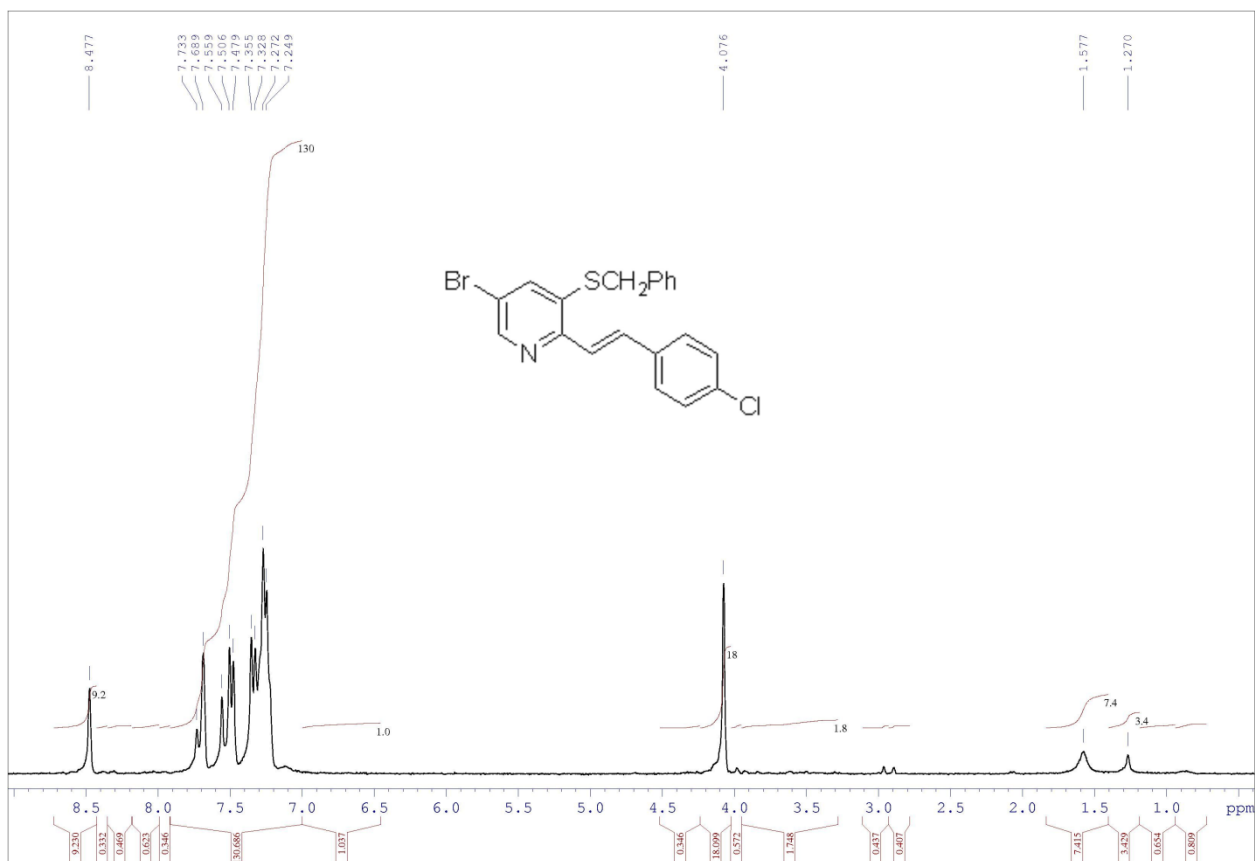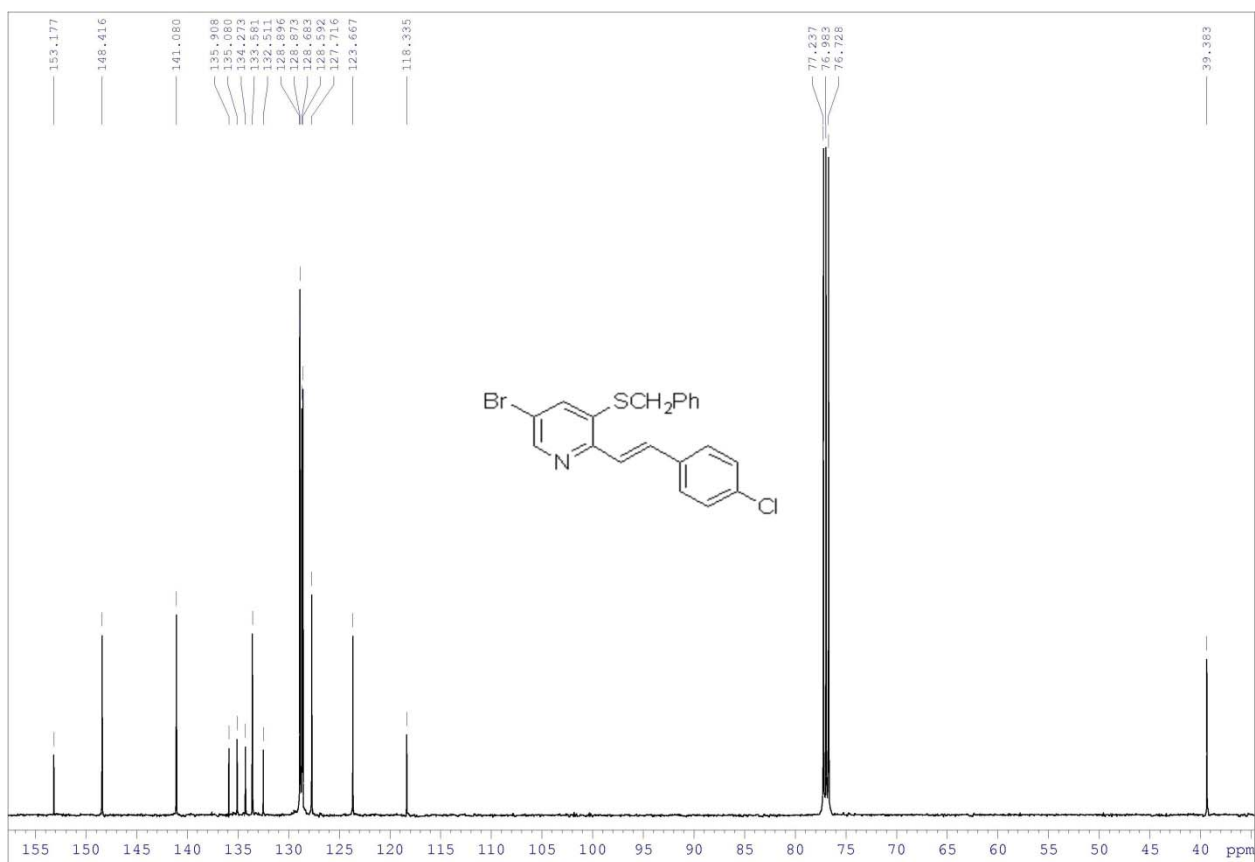

$^1\text{H}$  and  $^{13}\text{C}$  NMR spectra of compound **5q** in  $\text{CDCl}_3$

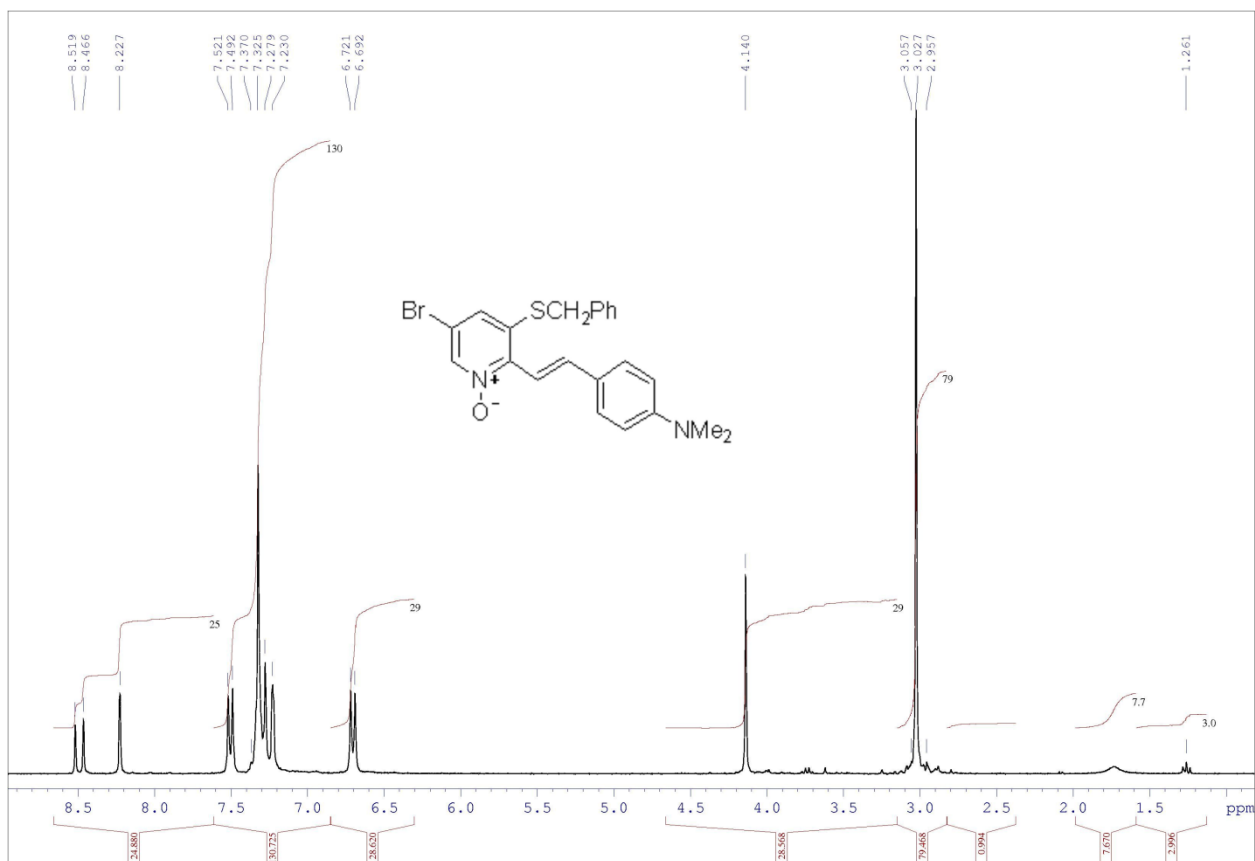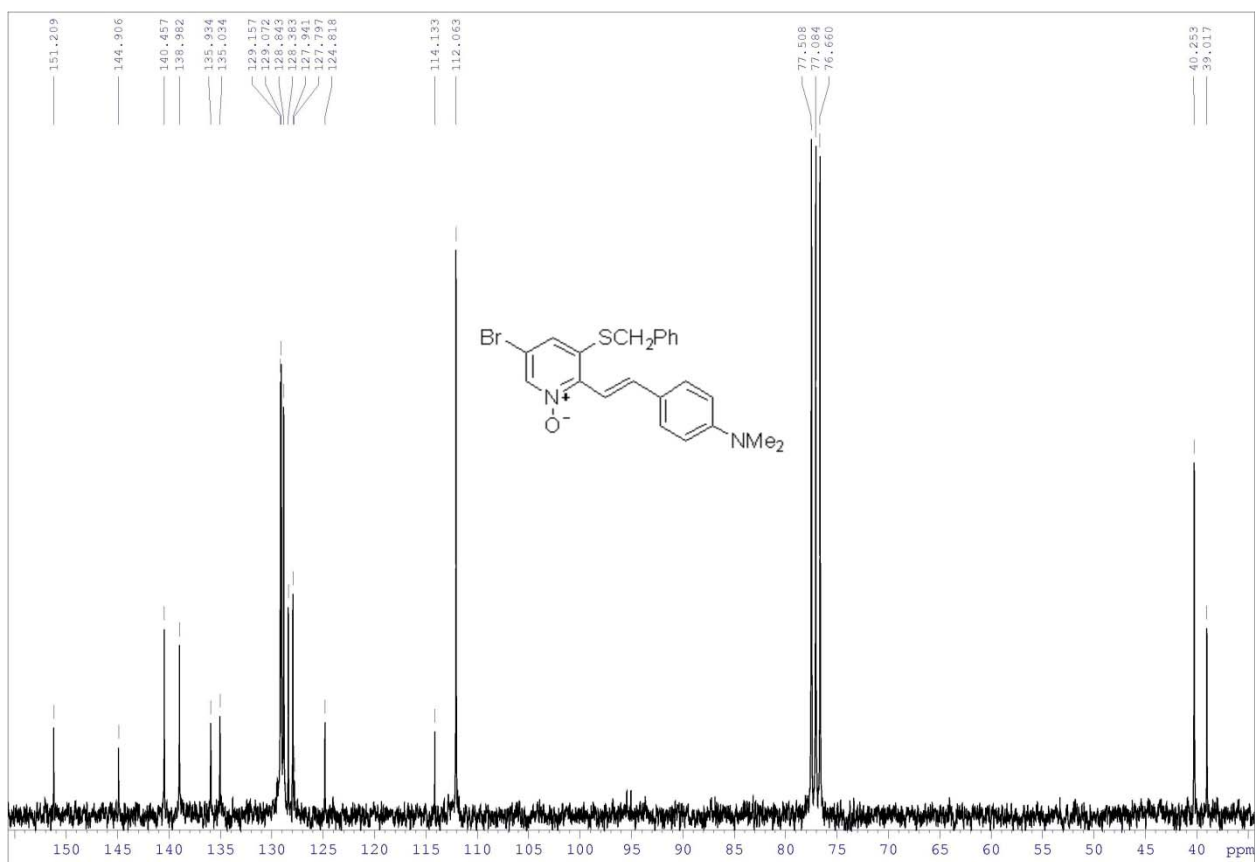

$^1\text{H}$  NMR spectrum of compound **6g** in  $\text{CDCl}_3$

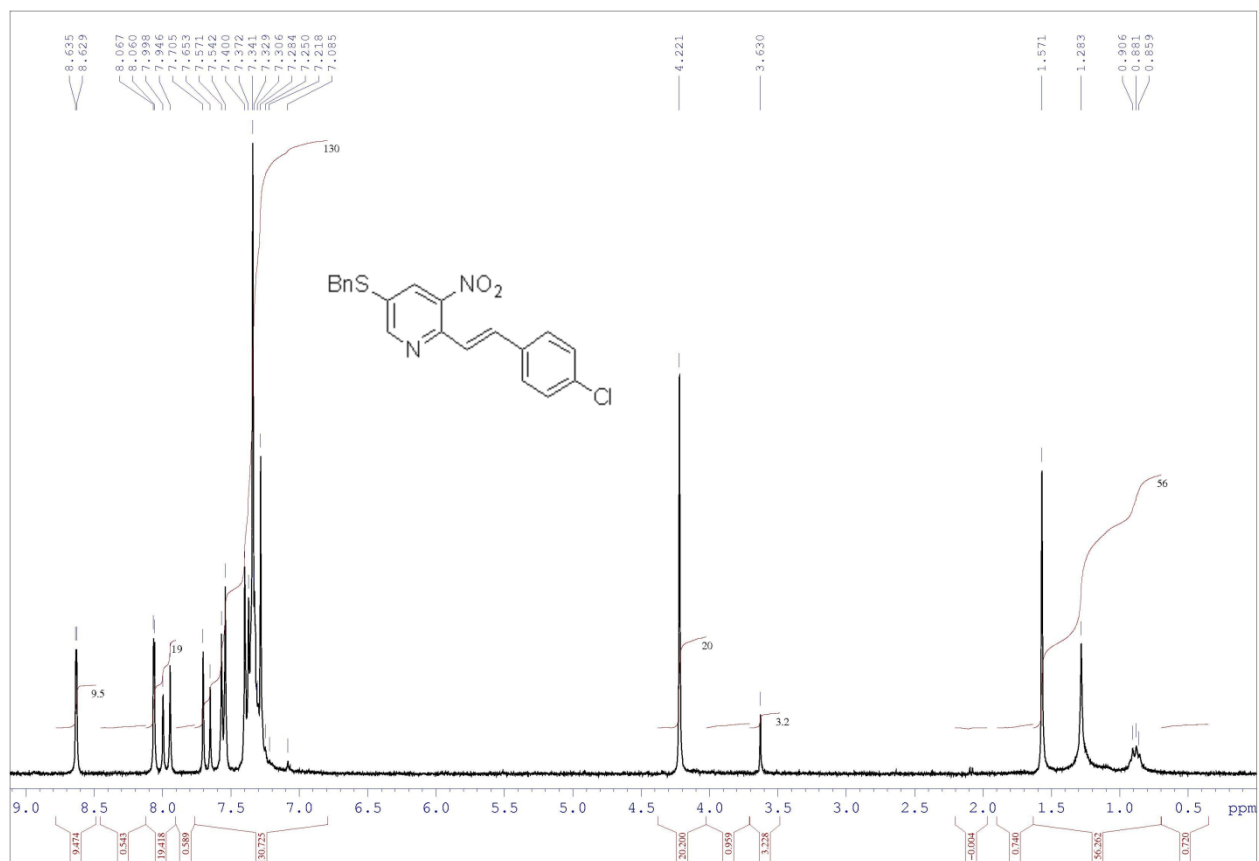

$^1\text{H}$  and  $^{13}\text{C}$  NMR spectra of compound **6h** in  $\text{CDCl}_3$

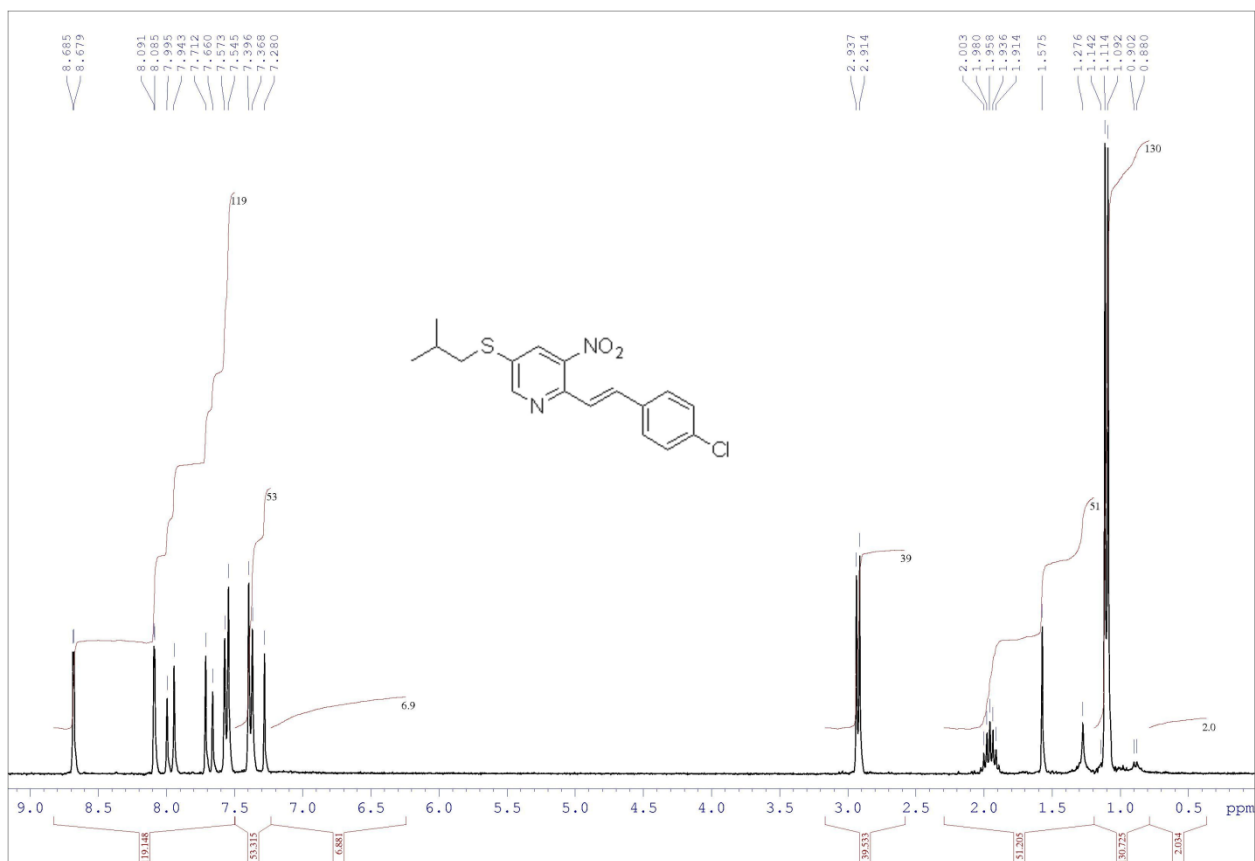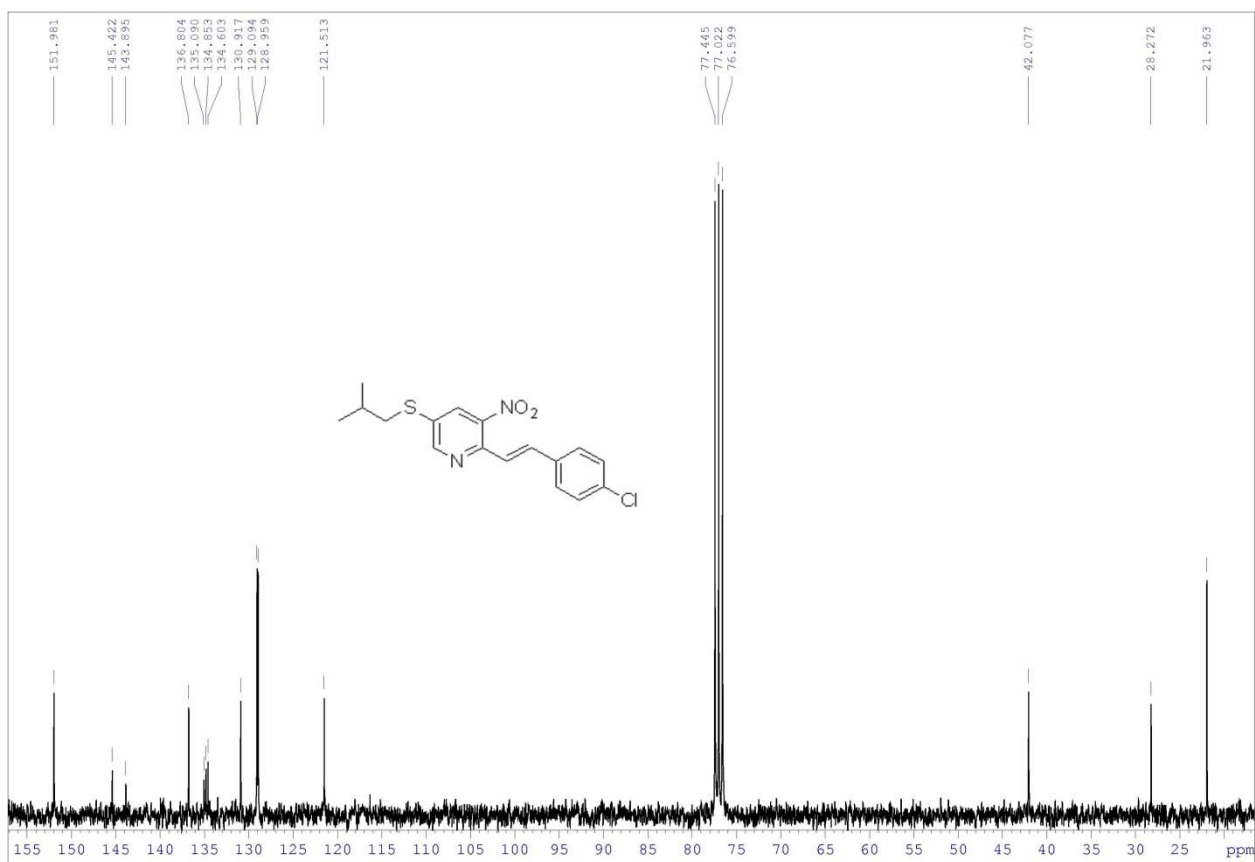

Supplement: s1 [file s1]
